# Supplementary material for: Enhanced biocompatibility of 3D printed resin parts via wet autoclave postprocessing: implications for stem cell organ-on-a-chip culture
Source: Royal Society of Chemistry journal article supplement (doi:10.1039/d4ma01191k), 2025-01-01
Supplement: d4ma01191k2.xlsx [file d4ma01191k2.xlsx]

## Sheet: PS vs D90 - 8122 DESeq2 results
GeneID	Base mean	log2(FC)	StdErr	Wald-Stats	P-value	P-adj
2002-03-01	27.1749	0.0947717	0.510903	0.185498	0.852838	0.998477
2002-09-01	352.508	-0.381382	0.355332	-1.07331	0.283132	0.998477
2005-03-01	14.2258	0.160222	0.757153	0.211611	0.832411	0.998477
2006-09-01	21.8163	-1.40234	0.831382	-1.68676	0.0916504	0.812647
2007-03-01	49.7382	-0.411465	0.792455	-0.519228	0.603602	0.998477
2007-09-01	63.0134	-0.596158	0.411717	-1.44798	0.147623	0.916392
2008-09-01	4.69372	-0.609306	1.08501	-0.561566	0.574411	0.998477
2009-09-01	26.3062	2.12927	0.76172	2.79534	0.00518447	0.211599
2010-09-01	8.66694	0.786617	0.846211	0.929575	0.352591	0.998477
2011-09-01	126.417	0.149427	0.484674	0.308304	0.757851	0.998477
AAAS	15.3883	0.218666	0.588204	0.371752	0.710077	0.998477
AACS	19.3235	-1.83161	0.885206	-2.06913	0.0385338	0.610579
AADAT	11.5455	0.823559	3.50358	0.235063	0.81416	0.998477
AAGAB	51.2291	0.518765	0.392199	1.32271	0.185933	0.958624
AAMDC	2.77928	1.95525	1.82846	1.06934	0.284915	0.998477
AAMP	48.1331	-0.0532795	0.366869	-0.145228	0.884531	0.998477
AAR2	29.3158	-0.290235	0.620868	-0.467466	0.640166	0.998477
AARS	219.087	-0.513341	0.394477	-1.30132	0.193149	0.96228
AASDH	9.60199	1.15721	1.38033	0.838357	0.40183	0.998477
AASDHPPT	15.7471	0.0669608	0.498171	0.134413	0.893076	0.998477
AASS	14.2022	0.432084	1.53814	0.280914	0.778776	0.998477
AATF	51.6526	0.91416	0.449365	2.03434	0.0419175	0.622402
AB019441.29	5.66011	1.05004	0.920973	1.14014	0.254229	0.998477
ABAT	5.69934	5.01465	2.42478	2.06808	0.0386322	0.610579
ABBA01000934.1	3.0088	0.115352	1.52003	0.0758875	0.939509	0.998477
ABCA6	8.15759	-3.56043	1.72855	-2.05978	0.0394199	0.613349
ABCA8	11.7679	1.96753	1.24873	1.57563	0.115112	0.862488
ABCA9	3.84563	-2.61044	2.28917	-1.14034	0.254144	0.998477
ABCB7	13.4852	1.78648	1.28229	1.3932	0.16356	0.936217
ABCB8	11.9626	0.0156529	0.728252	0.0214938	0.982852	0.998477
ABCC1	10.3481	1.28157	0.869504	1.47391	0.140505	0.905068
ABCC3	19.8051	3.29435	1.15901	2.84239	0.00447769	0.19448
ABCC4	4.90384	-5.14768	2.87439	-1.79088	0.0733127	0.747009
ABCC5	10.5295	0.0695133	0.644509	0.107855	0.914111	0.998477
ABCD3	33.3923	2.46354	0.955489	2.57831	0.00992861	0.298693
ABCD4	25.0803	0.0990055	0.482951	0.205001	0.837571	0.998477
ABCF1	5.27027	0.338956	0.991854	0.341739	0.732547	0.998477
ABCF2	13.6322	0.322518	0.548835	0.587642	0.556773	0.998477
ABCF2P1	11.638	0.0805861	0.58789	0.137077	0.89097	0.998477
ABCF3	11.4188	0.374462	0.904769	0.413876	0.678965	0.998477
ABHD10	16.225	0.588276	0.697813	0.843028	0.399213	0.998477
ABHD12	18.2748	0.348603	1.04264	0.334347	0.738117	0.998477
ABHD13	3.74934	0.238733	1.28785	0.185374	0.852936	0.998477
ABHD14B	27.0098	0.565831	0.402198	1.40684	0.159474	0.934106
ABHD18	3.20116	5.13563	2.25394	2.27852	0.0226958	0.477553
ABHD2	22.3742	1.10863	1.42658	0.777126	0.437084	0.998477
ABHD3	4.51886	1.56106	1.87527	0.832445	0.405158	0.998477
ABHD4	102.408	0.172312	0.211903	0.813164	0.416124	0.998477
ABHD5	23.0044	0.40599	0.730917	0.555453	0.578585	0.998477
ABHD6	7.21348	1.07622	1.82202	0.590674	0.554739	0.998477
ABI1	43.6705	-0.243077	0.603729	-0.402626	0.687223	0.998477
ABI1P1	2.82579	-0.136401	1.26256	-0.108035	0.913968	0.998477
ABI2	42.3915	0.279027	0.529955	0.52651	0.598534	0.998477
ABI3BP	98.6163	2.00846	0.395961	5.07238	3.92877e-07	0.000167944
ABL1	4.22452	1.10774	1.23868	0.894288	0.371168	0.998477
ABL2	3.63729	2.17368	1.7561	1.23779	0.215794	0.989097
ABLIM3	10.4759	0.999663	1.41268	0.707636	0.479171	0.998477
ABR	3.22705	-2.4672	1.42184	-1.73522	0.0827016	0.781049
ABRACL	7.37525	0.855497	0.745304	1.14785	0.251031	0.998477
ABT1	8.07795	-0.767999	0.731604	-1.04975	0.293834	0.998477
ABTB1	9.24837	0.477058	1.13277	0.421141	0.673652	0.998477
AC000089.3	71.0985	1.26565	0.516978	2.44818	0.0143581	0.357532
AC002056.3	4.12982	-0.283145	0.973929	-0.290724	0.771262	0.998477
AC004057.1	3.03084	-0.209333	1.0381	-0.20165	0.84019	0.998477
AC004381.6	12.6812	0.810413	1.42569	0.568436	0.569739	0.998477
AC004386.4	21.8644	-0.186166	0.466539	-0.399035	0.689867	0.998477
AC004453.8	10.5371	0.530256	0.616493	0.860116	0.389725	0.998477
AC004951.5	3.17382	0.279109	1.28519	0.217173	0.828073	0.998477
AC005077.7	4.89919	0.25963	1.08934	0.238337	0.81162	0.998477
AC005154.6	6.45819	-0.365168	1.07622	-0.339306	0.734379	0.998477
AC005251.3	3.49386	0.270049	1.19548	0.225892	0.821285	0.998477
AC005539.2	3.84182	-0.248008	1.09221	-0.227069	0.82037	0.998477
AC005795.1	35.4169	-0.39105	0.356318	-1.09748	0.272433	0.998477
AC005822.1	14.3604	-0.361092	0.567982	-0.635746	0.524942	0.998477
AC006026.9	7.28417	0.676924	0.866914	0.780844	0.434894	0.998477
AC006028.11	4.05784	-0.255787	0.94855	-0.269661	0.787421	0.998477
AC006042.8	3.40225	0.528961	1.39052	0.380405	0.703645	0.998477
AC007041.2	20.6941	-0.0367094	0.507515	-0.0723317	0.942338	0.998477
AC007229.3	8.36251	-0.126423	0.754148	-0.167636	0.866869	0.998477
AC007246.3	9.90198	0.0798261	0.785571	0.101615	0.919062	0.998477
AC007318.5	52.9083	0.500547	0.379752	1.31809	0.187474	0.959572
AC007383.6	7.10861	-0.05588	0.710224	-0.0786795	0.937288	0.998477
AC007560.1	25.9317	0.263735	0.420176	0.627678	0.530215	0.998477
AC007881.4	6.41506	-0.788857	1.05533	-0.747496	0.454764	0.998477
AC007969.4	4.96131	-0.243568	0.894751	-0.272219	0.785454	0.998477
AC007969.5	5.86602	-1.17659	0.870825	-1.35112	0.176658	0.955557
AC008427.2	8.30379	0.528155	0.749159	0.704998	0.480812	0.998477
AC009245.3	374.137	-0.325752	0.184307	-1.76744	0.0771543	0.760055
AC009299.5	3.74432	0.388863	1.08857	0.357223	0.720925	0.998477
AC009948.5	3.75698	-0.0302119	1.38023	-0.021889	0.982536	0.998477
AC009948.7	12.041	-0.313745	0.64605	-0.485636	0.627225	0.998477
AC009963.6	19.9158	-0.30986	0.500257	-0.619402	0.535651	0.998477
AC010240.3	3.33112	-0.146901	1.09226	-0.134492	0.893013	0.998477
AC010468.1	191.544	8.09037e-05	0.305808	0.000264557	0.999789	0.999979
AC010492.5	5.20283	-0.741644	1.03596	-0.715903	0.474051	0.998477
AC010878.3	57.2678	0.20348	0.292889	0.694737	0.48722	0.998477
AC012066.1	12.4194	-0.377878	0.628063	-0.601656	0.547403	0.998477
AC013461.1	10.1082	0.0889701	1.11944	0.0794772	0.936653	0.998477
AC013470.6	20.9505	-0.0191694	0.43977	-0.0435896	0.965232	0.998477
AC015849.14	6.80798	-0.359282	0.760009	-0.472733	0.636403	0.998477
AC016292.3	32.7726	0.687552	0.559937	1.22791	0.219481	0.991059
AC016577.1	3.24561	1.4002	1.21974	1.14795	0.250988	0.998477
AC016716.1	8.94152	-0.471775	0.650165	-0.725623	0.46807	0.998477
AC016734.2	23.7194	-0.207373	0.421188	-0.492352	0.622471	0.998477
AC016739.2	23.6475	-0.241575	0.415877	-0.58088	0.561322	0.998477
AC018696.4	5.85333	-0.178098	0.798696	-0.222986	0.823547	0.998477
AC018804.6	4.62736	1.21703	1.06548	1.14223	0.253357	0.998477
AC022182.2	4.49475	-0.12086	1.26019	-0.095906	0.923595	0.998477
AC022210.2	11.1218	-0.382605	0.668587	-0.572259	0.567146	0.998477
AC023128.2	4.54406	-0.537441	1.04937	-0.512155	0.608542	0.998477
AC024560.3	11.2669	-0.0218781	0.657784	-0.0332604	0.973467	0.998477
AC026271.5	10.6279	-0.327623	0.61886	-0.529398	0.59653	0.998477
AC027612.6	10.1033	-0.559711	0.662265	-0.845147	0.398029	0.998477
AC064850.4	18.8281	0.0916391	0.475431	0.19275	0.847155	0.998477
AC068657.2	13.5441	-0.423911	0.571098	-0.742273	0.457922	0.998477
AC074019.2	16.2417	-0.304249	0.496994	-0.612179	0.540419	0.998477
AC078899.1	5.26846	0.168474	0.853606	0.197367	0.84354	0.998477
AC079248.1	13.4834	-0.122419	0.694418	-0.176291	0.860066	0.998477
AC079250.1	21.3126	-0.623445	0.497575	-1.25297	0.210218	0.98627
AC079922.2	4.83045	0.00721585	0.93289	0.00773494	0.993828	0.999601
AC083862.6	5.96789	0.264908	0.813624	0.32559	0.744735	0.998477
AC083873.4	70.9158	0.226573	0.327127	0.692616	0.488551	0.998477
AC083899.3	20.7907	-0.375499	0.942555	-0.398384	0.690347	0.998477
AC090498.1	5.41116	0.333462	0.882833	0.377718	0.70564	0.998477
AC092106.1	15.2656	-0.319467	0.578292	-0.552433	0.580652	0.998477
AC092610.12	4.90736	0.17775	0.887751	0.200225	0.841304	0.998477
AC092638.2	2.82629	-0.905974	1.26191	-0.71794	0.472795	0.998477
AC092646.2	6.886	-0.828235	0.737378	-1.12322	0.261346	0.998477
AC092664.1	8.98831	0.168533	0.631868	0.266721	0.789684	0.998477
AC093616.4	17.6626	0.0613743	0.702616	0.0873512	0.930392	0.998477
AC093642.5	6.26142	0.17222	0.87116	0.197691	0.843287	0.998477
AC097533.1	8.47221	-0.238529	0.685719	-0.347852	0.727952	0.998477
AC098614.2	55.9756	-0.0747423	0.29585	-0.252636	0.80055	0.998477
AC104297.1	18.9361	0.583698	0.537077	1.0868	0.277123	0.998477
AC104651.2	49.6967	0.363893	0.358507	1.01502	0.310095	0.998477
AC108479.2	8.2578	0.199992	0.791208	0.252768	0.800448	0.998477
AC111200.7	9.14277	0.14477	0.76771	0.188573	0.850427	0.998477
AC113404.1	19.6294	0.264796	0.433871	0.61031	0.541657	0.998477
AC114776.1	5.15367	0.0379482	1.02864	0.0368914	0.970572	0.998477
AC115617.2	4.55663	0.502665	0.95809	0.524653	0.599825	0.998477
AC125232.1	7.76905	-0.573966	0.925234	-0.620347	0.535029	0.998477
AC125238.2	16.2421	0.111201	0.583612	0.190539	0.848886	0.998477
AC126365.1	13.0547	-0.10226	0.763357	-0.13396	0.893434	0.998477
AC138969.4	3.23191	-0.577169	1.25017	-0.461674	0.644315	0.998477
AC144530.1	3.86628	0.252524	0.95428	0.264622	0.7913	0.998477
ACAA1	20.2553	-0.723753	0.518037	-1.39711	0.162381	0.934806
ACAA2	15.1715	0.360885	0.49207	0.733402	0.463313	0.998477
ACACA	5.95789	-1.38336	1.4829	-0.932871	0.350887	0.998477
ACAD10	3.95108	0.187931	2.35107	0.0799341	0.93629	0.998477
ACAD8	24.5978	-0.596289	0.488207	-1.22139	0.22194	0.99262
ACAD9	64.6423	0.533404	0.497328	1.07254	0.283478	0.998477
ACADM	40.7066	0.53026	0.820648	0.646147	0.518184	0.998477
ACADSB	15.3946	0.927883	1.07834	0.860473	0.389528	0.998477
ACADVL	15.4174	0.597771	0.512026	1.16746	0.243024	0.998477
ACAP2	6.0015	1.39449	1.49249	0.934339	0.350129	0.998477
ACAT1	116.817	0.452023	0.460947	0.980641	0.32677	0.998477
ACAT2	246.107	1.213	0.255096	4.75508	1.98366e-06	0.000555563
ACBD3	7.24694	0.105075	1.0596	0.0991652	0.921007	0.998477
ACBD5	9.46309	0.485255	0.738491	0.65709	0.511123	0.998477
ACBD6	47.7453	0.536033	0.447111	1.19888	0.230575	0.998477
ACCS	11.7888	-1.45215	1.55295	-0.935095	0.349739	0.998477
ACER3	3.35449	5.18756	2.13106	2.43427	0.014922	0.364032
ACIN1	2.98605	1.74923	1.51471	1.15483	0.248159	0.998477
ACKR3	12.6642	0.0494229	0.605071	0.0816811	0.9349	0.998477
ACKR4	6.86596	0.707227	1.026	0.689303	0.490633	0.998477
ACLY	258.18	0.909246	0.513248	1.77155	0.076469	0.760055
ACO1	153.146	0.514046	0.20357	2.52516	0.0115647	0.318401
ACOT13	4.11407	0.103435	1.00135	0.103296	0.917728	0.998477
ACOT2	5.92518	-0.167132	1.01785	-0.164202	0.869572	0.998477
ACOT7	9.195	-0.554442	0.913318	-0.607063	0.543809	0.998477
ACOT8	17.0706	0.147756	0.550621	0.268344	0.788434	0.998477
ACOT9	64.8235	-0.813763	0.302823	-2.68726	0.0072041	0.25663
ACOX1	9.62833	-0.77044	0.975041	-0.790161	0.429433	0.998477
ACOX2	55.4153	0.196296	0.576399	0.340556	0.733438	0.998477
ACOX3	49.1282	-0.00149728	0.979691	-0.00152831	0.998781	0.999979
ACP1	75.7507	-0.158635	0.382911	-0.414286	0.678665	0.998477
ACP2	15.281	0.296265	0.539447	0.549202	0.582867	0.998477
ACP6	2.89108	-2.40243	2.23848	-1.07324	0.283163	0.998477
ACSF2	10.5628	-0.516301	0.650316	-0.793924	0.42724	0.998477
ACSF3	16.9475	-0.906671	1.09511	-0.827925	0.407713	0.998477
ACSL1	43.1216	-1.01924	0.564139	-1.80672	0.0708067	0.747009
ACSL3	141.252	0.733021	0.253949	2.88649	0.00389571	0.181592
ACSL4	31.5169	2.39773	0.589755	4.06564	4.79017e-05	0.00972644
ACSL5	5.88928	1.53974	2.363	0.651603	0.514657	0.998477
ACSS2	22.6279	1.30133	0.81495	1.59682	0.110305	0.853772
ACTA2	95.0604	-0.898005	0.30567	-2.93783	0.00330522	0.164693
ACTB	762.018	0.280469	0.168279	1.6667	0.095575	0.817773
ACTBP11	3.95574	-0.154046	0.935541	-0.16466	0.869212	0.998477
ACTG1	531.648	0.489564	0.271492	1.80324	0.0713511	0.747009
ACTL6A	57.9644	-0.77113	0.487174	-1.58286	0.113452	0.859851
ACTN1	279.245	-0.473939	0.376467	-1.25891	0.208062	0.981915
ACTN4	23.722	0.075879	0.545154	0.139188	0.889301	0.998477
ACTN4P1	3.32674	0.0561752	1.10114	0.0510154	0.959313	0.998477
ACTR10	286.365	-0.0412341	0.140237	-0.294031	0.768734	0.998477
ACTR1A	82.3939	0.385266	0.277169	1.39	0.164528	0.936217
ACTR1B	11.0829	-0.776519	0.814512	-0.953355	0.34041	0.998477
ACTR2	74.6641	-0.294309	0.432343	-0.680731	0.496042	0.998477
ACTR3	51.4799	-0.199385	0.402262	-0.49566	0.620134	0.998477
ACTR3B	3.56289	1.18205	2.41437	0.489587	0.624426	0.998477
ACTR3P2	33.784	-0.399154	0.384369	-1.03846	0.299054	0.998477
ACTR5	6.13602	1.08361	1.46511	0.73961	0.459537	0.998477
ACTR6	40.5045	0.0135085	0.403862	0.0334483	0.973317	0.998477
ACTR8	24.3157	0.657328	0.873706	0.752345	0.451844	0.998477
ACVR1	68.276	0.586255	0.488375	1.20042	0.229976	0.998477
ACVR2A	6.61096	0.373424	1.40887	0.265053	0.790969	0.998477
ACVRL1	4.09263	-0.738601	1.2854	-0.574608	0.565557	0.998477
ACY1	3.45605	1.12851	1.05171	1.07302	0.283261	0.998477
ACYP2	22.1147	0.662121	0.689648	0.960085	0.337013	0.998477
ADA	25.901	-0.964389	1.02397	-0.941811	0.34629	0.998477
ADAL	3.17167	-0.749511	1.73202	-0.432738	0.665205	0.998477
ADAM10	49.7246	0.622213	0.420426	1.47996	0.138884	0.903547
ADAM12	56.2629	-1.88353	0.590635	-3.189	0.00142768	0.0923546
ADAM15	11.3134	0.836101	1.17889	0.70923	0.478182	0.998477
ADAM17	22.239	0.254376	0.934419	0.272229	0.785446	0.998477
ADAM32	3.40074	-1.39303	1.71874	-0.810496	0.417655	0.998477
ADAM9	136.464	-0.323561	0.296566	-1.09102	0.275263	0.998477
ADAMTS12	22.9137	0.116198	0.729578	0.159267	0.873458	0.998477
ADAMTS2	8.29579	-0.348583	1.27599	-0.273185	0.784711	0.998477
ADAMTSL1	37.1488	-0.642331	0.941765	-0.68205	0.495207	0.998477
ADAR	5.70948	-0.379677	0.957936	-0.396348	0.691848	0.998477
ADAT1	6.43499	-2.15812	1.25251	-1.72304	0.0848813	0.783015
ADCK1	10.7709	0.450589	1.30282	0.345857	0.72945	0.998477
ADCK2	2.83517	2.10884	3.24665	0.649541	0.515989	0.998477
ADCY3	8.01336	1.70664	1.43367	1.1904	0.233889	0.998477
ADCY9	3.08232	-2.08216	2.17293	-0.958224	0.33795	0.998477
ADD1	31.3508	-0.177238	0.635429	-0.278926	0.780301	0.998477
ADD2	6.27578	1.31048	1.8776	0.697952	0.485207	0.998477
ADD3	38.8362	-0.134935	0.7873	-0.171389	0.863918	0.998477
ADGRA3	3.0597	-3.33708	1.81853	-1.83504	0.0664993	0.73222
ADGRE2	6.11118	2.04394	0.942352	2.16898	0.0300841	0.549086
ADGRE5	15.457	1.35984	0.781956	1.73903	0.0820296	0.778035
ADGRL4	33.1979	-0.450526	0.578862	-0.778297	0.436394	0.998477
ADH1A	13.9448	-1.64817	0.624863	-2.63766	0.00834812	0.2765
ADH1B	79.1473	-1.3547	0.416949	-3.24907	0.00115782	0.0847188
ADH1C	19.2907	-1.3191	0.608056	-2.16937	0.0300546	0.549086
ADH5	36.2984	0.179406	0.463697	0.386903	0.698828	0.998477
ADH5P2	7.66394	0.134888	0.735243	0.18346	0.854437	0.998477
ADH5P3	6.68509	0.494534	0.816631	0.605578	0.544795	0.998477
ADH5P4	69.018	0.0635199	0.292188	0.217394	0.827901	0.998477
ADHFE1	6.37699	2.12207	1.48452	1.42947	0.15287	0.924971
ADI1	63.7103	0.1808	0.35812	0.504859	0.613658	0.998477
ADIPOR1	92.8991	0.189463	0.376764	0.502868	0.615057	0.998477
ADIPOR2	6.69682	-0.811446	1.22724	-0.661196	0.508487	0.998477
ADK	74.839	-1.2686	0.526476	-2.4096	0.0159698	0.384038
ADM	17.2177	0.260069	0.529089	0.491541	0.623044	0.998477
ADPGK	14.5385	0.442625	0.778815	0.568332	0.56981	0.998477
ADPRHL1	6.49563	0.460941	1.2484	0.369226	0.711959	0.998477
ADPRHL2	11.8377	-0.567405	0.610928	-0.928758	0.353014	0.998477
ADPRM	12.4884	0.613569	0.627571	0.977689	0.328228	0.998477
ADRM1	39.7601	0.76577	0.391201	1.95748	0.0502909	0.661153
ADSL	169.069	0.109349	0.364652	0.299873	0.764274	0.998477
AE000658.30	6.23304	1.0426	0.841065	1.23962	0.215117	0.988782
AEBP1	19.3062	-0.644529	0.580735	-1.10985	0.267063	0.998477
AEN	3.32706	0.539842	1.04058	0.518789	0.603908	0.998477
AES	4.26705	1.05159	1.15336	0.911762	0.361894	0.998477
AF196972.4	46.1769	0.156357	0.299136	0.522696	0.601186	0.998477
AFAP1	19.2115	-0.495844	0.83757	-0.592003	0.553849	0.998477
AFG3L2	3.90034	0.201371	1.04934	0.191902	0.847819	0.998477
AFMID	22.989	-1.21455	0.505865	-2.40094	0.0163531	0.391799
AGA	41.5715	-0.249319	0.97398	-0.255979	0.797967	0.998477
AGAP3	4.25703	1.58483	1.3185	1.20199	0.229367	0.998477
AGBL5	5.05753	0.806411	0.981852	0.821316	0.411466	0.998477
AGFG1	5.4947	1.90322	1.42245	1.33799	0.1809	0.957136
AGFG2	2.76323	0.882477	2.61911	0.336938	0.736164	0.998477
AGO2	3.08234	-4.42749	1.96584	-2.25221	0.0243088	0.4933
AGO3	8.80251	-4.94668	1.49939	-3.29912	0.000969893	0.0763914
AGPAT2	3.21702	0.664992	1.95238	0.340606	0.7334	0.998477
AGPAT4	18.448	-1.29228	1.28738	-1.00381	0.315472	0.998477
AGPAT5	3.77891	-1.18029	2.07216	-0.569592	0.568954	0.998477
AGPS	22.6589	-2.34803	1.06209	-2.21076	0.0270522	0.518203
AGT	4.68956	0.342664	1.20329	0.284773	0.775818	0.998477
AGTPBP1	7.26133	-0.62095	3.02998	-0.204936	0.837622	0.998477
AGTRAP	69.2779	-0.240938	0.314159	-0.766932	0.443122	0.998477
AHCY	28.1954	0.609209	0.404254	1.507	0.131812	0.896824
AHCYL1	23.3548	0.462975	0.772139	0.599601	0.548772	0.998477
AHCYP4	8.44798	1.08536	0.771863	1.40616	0.159677	0.934106
AHCYP7	4.89528	0.378541	0.901142	0.420067	0.674436	0.998477
AHI1	4.04528	5.46152	2.64692	2.06335	0.0390796	0.611569
AHNAK	93.7867	0.810347	0.229392	3.53259	0.000411514	0.0482348
AHNAK2	5.15745	1.96798	1.10087	1.78765	0.0738319	0.747009
AHSA1	129.344	0.514191	0.276385	1.86041	0.0628271	0.722779
AIDA	5.80934	-0.230368	0.8869	-0.259745	0.795061	0.998477
AIFM1	47.2917	0.592108	0.533669	1.1095	0.267213	0.998477
AIFM1P1	2.84427	0.300221	1.1544	0.260065	0.794813	0.998477
AIFM2	17.8883	1.04565	0.804277	1.30012	0.193561	0.96228
AIG1	42.2673	0.90948	0.380548	2.38992	0.0168518	0.397879
AIM1	4.16302	0.502433	1.45693	0.344858	0.730201	0.998477
AIMP1	84.5731	0.366187	0.324285	1.12921	0.258808	0.998477
AIMP1P1	7.02292	0.648718	0.778472	0.833323	0.404663	0.998477
AIMP2	39.6275	-0.0491187	0.354956	-0.13838	0.88994	0.998477
AIP	25.5747	0.180949	0.605595	0.298796	0.765096	0.998477
AK1	5.27993	0.0800239	0.921234	0.0868659	0.930778	0.998477
AK2	12.4195	0.188822	0.570704	0.330857	0.740752	0.998477
AK3	33.969	-0.424779	0.521887	-0.813929	0.415686	0.998477
AK5	19.5401	0.347504	1.3451	0.258348	0.796139	0.998477
AK6	18.8748	-0.371564	0.485133	-0.765902	0.443735	0.998477
AK6P1	8.11765	-0.403791	0.655757	-0.615763	0.538051	0.998477
AK9	5.25781	1.63698	1.83115	0.893961	0.371343	0.998477
AKAP10	9.44668	-1.1912	1.38178	-0.862076	0.388646	0.998477
AKAP8	3.98055	0.69215	1.89071	0.366079	0.714306	0.998477
AKAP9	4.35586	-1.95038	2.6442	-0.737605	0.460755	0.998477
AKIP1	25.5878	-0.173156	0.537779	-0.321984	0.747465	0.998477
AKIRIN1	25.6667	-0.447872	0.747655	-0.599036	0.549149	0.998477
AKIRIN2	15.2015	0.0419592	0.516853	0.0811822	0.935297	0.998477
AKR1A1	87.1495	-0.384102	0.261154	-1.47079	0.141349	0.905902
AKR1B1	38.7566	0.45939	0.353748	1.29863	0.194069	0.96228
AKR1B10P1	4.13679	2.30296	1.09048	2.11187	0.0346972	0.581053
AKR1B1P1	10.885	-0.100379	0.607608	-0.165204	0.868783	0.998477
AKR1B1P3	58.0036	0.414297	0.266932	1.55207	0.120646	0.876315
AKR1B1P7	34.4323	0.406703	0.3615	1.12505	0.26057	0.998477
AKR1C1	266.333	1.88597	0.327423	5.76005	8.40875e-09	5.69132e-06
AKR1C2	281.965	1.43893	0.22359	6.43557	1.2301e-10	1.24886e-07
AKR1C3	289.341	0.884605	0.165467	5.34611	8.98628e-08	4.29333e-05
AKR1C4	56.6913	1.55103	0.310505	4.99518	5.87822e-07	0.000207578
AKR1E2	3.36597	-3.20354	2.3414	-1.36822	0.171244	0.945582
AKR7A2	31.3001	-0.621826	0.376531	-1.65146	0.0986444	0.825747
AKR7A2P1	9.15784	-0.757316	0.621175	-1.21917	0.222781	0.994991
AKT1S1	2.80969	0.602349	1.20414	0.50023	0.616913	0.998477
AKT2	34.554	-0.408382	0.384395	-1.0624	0.288053	0.998477
AKT3	4.0875	4.4808	1.7757	2.52341	0.0116224	0.31891
AL049758.2	4.0279	0.968723	0.999202	0.969497	0.332297	0.998477
AL121578.5	89.8704	0.657925	0.250011	2.63158	0.00849882	0.278101
AL590762.6	18.3857	-0.0713841	0.600117	-0.11895	0.905315	0.998477
ALAD	10.2481	0.588739	0.871991	0.675166	0.49957	0.998477
ALAS1	39.9364	-0.500379	0.441167	-1.13422	0.256703	0.998477
ALCAM	6.42408	-2.57589	1.37491	-1.8735	0.0609994	0.717855
ALDH18A1	95.037	-0.862556	0.414435	-2.08128	0.0374081	0.60164
ALDH1B1	7.07281	-0.866176	0.928371	-0.933007	0.350816	0.998477
ALDH1L2	17.8412	-1.28012	1.14458	-1.11842	0.263387	0.998477
ALDH2	87.3903	0.756831	0.427954	1.76849	0.0769797	0.760055
ALDH3A2	24.2831	0.171573	0.792704	0.216441	0.828644	0.998477
ALDH3B1	4.50823	1.66333	1.90237	0.874351	0.381927	0.998477
ALDH6A1	6.18018	1.17462	1.10577	1.06227	0.288113	0.998477
ALDH7A1	2.88028	0.535188	1.26824	0.421994	0.673029	0.998477
ALDH7A1P1	20.8443	0.428122	0.490535	0.872765	0.382791	0.998477
ALDH9A1	230.04	0.481646	0.242853	1.98329	0.0473354	0.648327
ALDOA	621.088	0.48053	0.171194	2.80694	0.00500148	0.207255
ALDOAP2	5.6329	0.918114	0.843399	1.08859	0.276335	0.998477
ALG1	19.2169	-0.278308	0.560114	-0.496878	0.619275	0.998477
ALG12	11.322	-0.382935	0.741208	-0.516637	0.60541	0.998477
ALG13	17.6984	-0.976289	0.672644	-1.45142	0.146663	0.916392
ALG14	14.3352	-1.46702	1.05059	-1.39637	0.162602	0.934806
ALG1L15P	8.49955	0.107835	0.723787	0.148988	0.881563	0.998477
ALG2	7.45604	0.422167	0.90952	0.464165	0.64253	0.998477
ALG3	23.009	0.403601	0.53844	0.749576	0.45351	0.998477
ALG5	144.995	-0.870091	0.260862	-3.33545	0.000851612	0.0700807
ALG6	25.4497	-0.327264	1.00032	-0.32716	0.743547	0.998477
ALG8	55.2195	0.680007	0.913566	0.744344	0.456669	0.998477
ALKBH1	3.39457	-1.67742	1.80904	-0.927245	0.353799	0.998477
ALKBH2	14.8788	0.768651	0.669432	1.14821	0.25088	0.998477
ALKBH3	36.4442	0.637824	0.3883	1.64261	0.100464	0.830322
ALKBH5	4.86807	0.0206864	0.981736	0.0210712	0.983189	0.998477
ALKBH7	4.84155	-0.13034	0.855405	-0.152372	0.878893	0.998477
ALKBH8	7.67591	2.75523	2.31665	1.18931	0.234316	0.998477
ALPK2	9.20337	0.83944	1.31186	0.639883	0.522249	0.998477
ALPL	3.04669	0.0799972	3.22785	0.0247834	0.980228	0.998477
AMACR	10.7789	0.210104	0.72161	0.29116	0.770929	0.998477
AMBRA1	4.47073	1.82888	1.82024	1.00475	0.315019	0.998477
AMD1	27.0914	0.106964	0.402242	0.26592	0.790301	0.998477
AMFR	20.3239	-1.05069	1.00457	-1.04591	0.295604	0.998477
AMMECR1L	2.9054	1.10857	1.43641	0.771763	0.440255	0.998477
AMN1	6.99625	1.35811	1.17201	1.15879	0.246544	0.998477
AMOTL1	21.4144	1.25889	0.651803	1.9314	0.0534335	0.683444
AMPH	24.399	1.0953	0.596095	1.83746	0.0661418	0.731743
AMZ2	90.2395	-0.0718899	0.318218	-0.225914	0.821268	0.998477
AMZ2P1	18.1749	-1.03823	0.576844	-1.79984	0.0718855	0.747009
AMZ2P2	5.76965	0.27916	0.840577	0.332105	0.73981	0.998477
ANAPC1	23.3617	-0.230262	0.961305	-0.239531	0.810694	0.998477
ANAPC10	7.73013	-0.642105	0.847995	-0.757204	0.448928	0.998477
ANAPC11	14.0589	-0.495175	0.670156	-0.738895	0.459971	0.998477
ANAPC13	41.4469	-0.308928	0.357783	-0.863451	0.38789	0.998477
ANAPC16	60.9588	-0.120532	0.321667	-0.374711	0.707875	0.998477
ANAPC2	5.68564	-0.439279	1.41011	-0.31152	0.755405	0.998477
ANAPC4	50.7774	0.475101	0.657978	0.722062	0.470256	0.998477
ANAPC5	268.074	-0.433982	0.390554	-1.1112	0.266484	0.998477
ANAPC7	45.1893	-0.259881	0.519211	-0.50053	0.616702	0.998477
ANGEL2	10.3443	-0.240971	1.05115	-0.229245	0.818679	0.998477
ANGPT1	11.3654	1.9943	1.45499	1.37067	0.170479	0.944494
ANGPTL1	6.15897	-1.30243	0.972183	-1.33969	0.180345	0.95611
ANGPTL2	14.878	-0.541653	0.708127	-0.764909	0.444326	0.998477
ANGPTL4	48.5083	1.34199	0.396406	3.38538	0.0007108	0.0620765
ANK2	6.70758	-0.587196	1.61882	-0.36273	0.716806	0.998477
ANKDD1A	3.92812	-0.460653	2.03355	-0.226526	0.820792	0.998477
ANKH	8.01738	-2.52413	1.54806	-1.63051	0.102993	0.834471
ANKLE2	6.43443	0.574499	1.29581	0.443353	0.657511	0.998477
ANKMY2	41.7091	0.145448	0.534287	0.272228	0.785447	0.998477
ANKRA2	29.1126	-0.678278	0.847574	-0.800257	0.423562	0.998477
ANKRD10	11.7336	1.0285	0.952213	1.08011	0.280092	0.998477
ANKRD13A	3.39822	1.08971	1.29704	0.840151	0.400824	0.998477
ANKRD13C	32.5093	1.05975	1.03757	1.02137	0.307079	0.998477
ANKRD13D	3.0992	2.38492	1.97717	1.20623	0.22773	0.998477
ANKRD17	6.10707	1.25827	1.82343	0.690059	0.490157	0.998477
ANKRD27	20.3332	-0.155125	1.09822	-0.141251	0.887672	0.998477
ANKRD28	9.34885	4.93407	1.2537	3.93559	8.2991e-05	0.014979
ANKRD35	3.14252	0.400153	1.13425	0.352791	0.724245	0.998477
ANKRD42	13.3316	-0.0676278	1.01505	-0.066625	0.94688	0.998477
ANKRD46	3.5906	2.03879	1.45023	1.40584	0.159772	0.934106
ANKZF1	2.78001	0.500277	1.95886	0.255392	0.79842	0.998477
ANO10	93.9883	0.840176	0.399794	2.10152	0.0355953	0.585232
ANO6	4.03158	1.12549	1.24137	0.906651	0.364592	0.998477
ANP32A	4.34916	0.0631636	0.919577	0.0686877	0.945238	0.998477
ANP32AP1	6.17532	-0.419096	0.752128	-0.557213	0.577382	0.998477
ANP32B	7.88803	0.976794	0.770204	1.26823	0.204717	0.979216
ANP32BP1	30.1832	0.568733	0.36413	1.5619	0.118313	0.868839
ANP32C	4.75185	-0.324678	0.863654	-0.375935	0.706965	0.998477
ANP32E	12.6629	-1.43958	0.803348	-1.79198	0.0731363	0.747009
ANPEP	75.166	0.028165	0.421275	0.0668565	0.946696	0.998477
ANTXR1	11.5649	-1.74295	0.700517	-2.48809	0.0128431	0.338673
ANTXR2	31.1237	-1.49654	0.749535	-1.99663	0.0458654	0.641169
ANXA1	1768.35	0.0843662	0.211748	0.398428	0.690314	0.998477
ANXA11	113.677	0.141594	0.539538	0.262436	0.792985	0.998477
ANXA2	981.012	-0.506484	0.142517	-3.55384	0.000379645	0.0474381
ANXA2P1	8.14159	-1.05823	0.716241	-1.47748	0.139546	0.903825
ANXA2P2	1049.72	-0.506675	0.139464	-3.63301	0.000280135	0.0392286
ANXA2P3	23.9326	-0.485861	0.427364	-1.13688	0.255589	0.998477
ANXA4	286.649	0.692481	0.271979	2.54608	0.010894	0.316301
ANXA5	2783.68	-0.227868	0.0929622	-2.45119	0.0142386	0.357532
ANXA6	712.384	0.303264	0.195126	1.5542	0.120137	0.875598
ANXA7	335.469	0.171809	0.201072	0.854466	0.392847	0.998477
AOX1	30.5122	0.951958	1.00874	0.943711	0.345317	0.998477
AP000654.5	4.4035	0.280803	0.995168	0.282166	0.777816	0.998477
AP1AR	7.74465	2.25804	1.35619	1.66498	0.0959159	0.817841
AP1B1	14.4282	0.897846	1.28223	0.700224	0.483788	0.998477
AP1G1	8.20411	1.01915	1.56138	0.652721	0.513936	0.998477
AP1M1	112.751	0.246524	0.401279	0.614346	0.538987	0.998477
AP1S1	130.267	0.097693	0.270328	0.361386	0.717811	0.998477
AP2A1	7.04701	1.75579	0.859288	2.04331	0.0410216	0.618299
AP2A2	12.6816	0.404818	0.962556	0.420565	0.674073	0.998477
AP2B1	4.84742	-0.268751	1.09756	-0.244862	0.806563	0.998477
AP2M1	266.852	-0.506463	0.135936	-3.72574	0.000194739	0.0310132
AP2S1	91.6353	0.162409	0.300066	0.541244	0.588339	0.998477
AP3B1	77.3925	1.03477	0.438944	2.35742	0.0184025	0.425826
AP3D1	11.0749	-0.93078	1.11171	-0.837249	0.402453	0.998477
AP3M1	19.5032	-1.03096	0.604028	-1.70681	0.0878568	0.799074
AP3M2	8.32463	-0.462357	0.948185	-0.487623	0.625817	0.998477
AP3S1	27.4561	-0.181457	0.387751	-0.467973	0.639804	0.998477
AP3S2	7.54453	0.236488	0.685201	0.345137	0.729991	0.998477
AP4B1	6.49071	0.0668351	0.915198	0.0730281	0.941784	0.998477
AP4M1	7.97342	0.127479	0.776705	0.164128	0.86963	0.998477
AP5M1	21.2494	1.00442	0.61314	1.63815	0.10139	0.831129
AP5Z1	3.87731	2.67076	1.62433	1.64423	0.10013	0.830288
APBB1	18.0046	-0.628529	0.490263	-1.28202	0.199834	0.970725
APBB2	8.02022	-2.12518	1.82235	-1.16617	0.243545	0.998477
APEH	18.8925	0.887091	0.612602	1.44807	0.147597	0.916392
APEX1	3.15062	-0.229361	1.07	-0.214355	0.83027	0.998477
APEX2	14.9268	0.423337	0.741649	0.570806	0.568131	0.998477
APH1A	16.9692	0.0329453	0.496162	0.0664003	0.947059	0.998477
APH1B	14.7057	0.331993	0.721862	0.459912	0.645579	0.998477
API5	12.1111	-0.351983	0.6783	-0.51892	0.603817	0.998477
API5P1	8.52506	0.0250203	0.703305	0.0355753	0.971621	0.998477
APLF	7.44753	-0.609454	1.03827	-0.586991	0.55721	0.998477
APLP1	5.57524	-3.42872	2.26536	-1.51355	0.130141	0.892739
APLP2	133.975	0.108972	0.482156	0.226011	0.821193	0.998477
APMAP	92.433	0.628417	0.538121	1.1678	0.242888	0.998477
APOBEC3C	33.2628	0.0815191	0.42877	0.190123	0.849212	0.998477
APOBEC3G	8.86462	-0.326332	1.04074	-0.313557	0.753857	0.998477
APOD	81.1408	-1.60833	0.380016	-4.23227	2.31347e-05	0.00521945
APOL1	18.8107	1.33039	0.908482	1.46441	0.143081	0.911429
APOL2	23.5596	-0.0417952	0.525093	-0.0795958	0.936559	0.998477
APOL3	5.88523	0.722202	1.1578	0.623768	0.53278	0.998477
APOL6	3.61866	1.47908	1.08818	1.35922	0.174078	0.952736
APOOP5	3.25387	0.787379	1.21113	0.650119	0.515615	0.998477
APOPT1	13.0141	0.351384	0.598237	0.587365	0.556958	0.998477
APP	552.39	0.265939	0.214659	1.23889	0.215386	0.988901
APPBP2	8.72655	-2.08915	1.13502	-1.84063	0.0656761	0.731743
APPL1	10.9807	0.37817	1.56802	0.241177	0.809418	0.998477
APPL2	76.9	0.444951	0.393689	1.13021	0.258389	0.998477
APRT	29.5518	-0.521664	0.512092	-1.01869	0.308348	0.998477
APTX	43.3991	-0.862845	0.434729	-1.98479	0.0471682	0.647259
AQR	24.6129	1.41669	2.73392	0.518191	0.604325	0.998477
ARAF	16.3109	-0.226023	0.524524	-0.430911	0.666533	0.998477
ARAP1	39.245	-0.90389	0.741128	-1.21961	0.222611	0.994991
ARCN1	75.7285	0.471221	0.513078	0.91842	0.358399	0.998477
ARF1	147.607	-0.122523	0.197656	-0.619878	0.535338	0.998477
ARF4	123.899	-0.291647	0.341006	-0.855253	0.392411	0.998477
ARF4P1	68.4643	-0.239846	0.36846	-0.650944	0.515083	0.998477
ARF5	53.9108	-0.000965002	0.310532	-0.00310758	0.997521	0.999899
ARF6	8.09906	0.102117	0.665083	0.15354	0.877972	0.998477
ARFGAP2	26.0766	0.0404271	0.723772	0.0558562	0.955456	0.998477
ARFGAP3	103.795	-0.0526677	0.440889	-0.119458	0.904912	0.998477
ARFGEF1	5.10401	0.357188	1.73664	0.205677	0.837043	0.998477
ARFIP1	31.468	-1.09005	0.897757	-1.2142	0.224673	0.996748
ARFIP2	11.9642	0.140543	0.714938	0.196581	0.844155	0.998477
ARFRP1	19.609	0.00177704	0.566446	0.00313718	0.997497	0.999899
ARG2	6.17344	2.11869	1.72086	1.23118	0.218256	0.991059
ARGLU1	17.4635	-0.345101	0.639083	-0.539994	0.589201	0.998477
ARHGAP1	31.9633	-0.249188	0.541931	-0.459816	0.645649	0.998477
ARHGAP10	20.9024	-0.41761	1.3938	-0.299619	0.764468	0.998477
ARHGAP12	10.7426	-0.186167	0.771894	-0.241182	0.809414	0.998477
ARHGAP17	35.0496	0.314602	0.627691	0.501206	0.616226	0.998477
ARHGAP18	26.9467	0.264216	0.986178	0.267919	0.788762	0.998477
ARHGAP24	31.7011	-0.861066	0.669821	-1.28552	0.198612	0.968184
ARHGAP29	7.89515	0.172201	2.13902	0.0805043	0.935836	0.998477
ARHGAP32	2.82995	-5.10343	3.6462	-1.39966	0.161616	0.934806
ARHGEF10L	6.66718	-0.681181	2.50291	-0.272155	0.785503	0.998477
ARHGEF12	6.78355	-1.97771	1.10747	-1.78579	0.0741337	0.74704
ARHGEF19	5.67104	-0.773875	1.38676	-0.558047	0.576812	0.998477
ARHGEF2	7.00427	2.30748	1.18109	1.95369	0.0507383	0.661153
ARHGEF3	14.9075	0.154594	1.37199	0.112679	0.910285	0.998477
ARHGEF6	5.34164	1.53102	1.99796	0.766292	0.443502	0.998477
ARHGEF7	13.2698	2.84656	1.17653	2.41945	0.0155442	0.376864
ARHGEF9	10.1137	0.651356	1.27622	0.510378	0.609787	0.998477
ARID4B	4.48403	1.35192	2.64438	0.511243	0.609181	0.998477
ARID5B	15.7685	-0.311392	1.16313	-0.26772	0.788915	0.998477
ARIH2	4.64585	-0.91363	0.907097	-1.0072	0.313838	0.998477
ARIH2P1	4.43416	0.234367	1.09864	0.213325	0.831074	0.998477
ARL1	121.895	-0.408639	0.336999	-1.21258	0.225291	0.996748
ARL14EP	22.0366	-0.811093	0.701606	-1.15605	0.24766	0.998477
ARL16	5.9198	0.396066	0.785725	0.504077	0.614207	0.998477
ARL2	47.7557	0.183886	0.398416	0.461544	0.644409	0.998477
ARL2BP	10.4586	0.0542032	0.674616	0.0803467	0.935961	0.998477
ARL3	28.4371	0.274197	0.464936	0.589751	0.555358	0.998477
ARL4D	40.1637	0.650707	0.343723	1.89311	0.0583426	0.713078
ARL6	6.92951	0.102366	1.46253	0.0699928	0.944199	0.998477
ARL6IP1	22.0319	-1.1092	0.474461	-2.33781	0.0193971	0.440367
ARL6IP5	245.788	0.361886	0.204384	1.77062	0.0766243	0.760055
ARL6IP6	11.2056	0.129599	0.65849	0.196812	0.843974	0.998477
ARL8A	4.61457	0.769596	1.03629	0.742643	0.457698	0.998477
ARL8B	14.0225	0.175528	0.535788	0.327607	0.743209	0.998477
ARMC1	9.55323	0.311728	0.764952	0.407513	0.683631	0.998477
ARMC6	11.3369	-0.553509	1.02143	-0.541895	0.587891	0.998477
ARMC8	15.7123	-1.26818	0.934308	-1.35735	0.17467	0.953406
ARMC8P1	3.27268	-0.923388	1.21276	-0.761395	0.446421	0.998477
ARMC9	107.627	-0.848391	0.273728	-3.0994	0.00193916	0.115808
ARMCX1	21.0955	0.250592	0.562622	0.4454	0.656031	0.998477
ARMCX2	14.9174	0.378935	0.51012	0.742835	0.457581	0.998477
ARMCX3	22.3054	-0.0497323	0.504202	-0.0986356	0.921428	0.998477
ARMCX6	19.9319	-0.20525	0.506173	-0.405494	0.685114	0.998477
ARMCX7P	8.42519	-0.173255	0.684718	-0.253031	0.800244	0.998477
ARMT1	26.8675	-0.323583	0.619283	-0.522512	0.601314	0.998477
ARNT	17.6514	0.620727	1.11062	0.558902	0.576228	0.998477
ARNTL	21.668	-0.168346	0.976618	-0.172377	0.863141	0.998477
ARPC1A	13.4701	-0.142092	0.640705	-0.221774	0.82449	0.998477
ARPC1B	268.837	0.393211	0.196129	2.00486	0.044978	0.641169
ARPC2	534.303	-0.296153	0.21188	-1.39774	0.162191	0.934806
ARPC3	14.4682	0.0525479	0.660112	0.0796045	0.936552	0.998477
ARPC3P1	24.6118	0.140563	0.468123	0.30027	0.763971	0.998477
ARPC4	31.2309	0.660242	0.506477	1.3036	0.19237	0.96228
ARPC5	202.17	-0.302603	0.197425	-1.53275	0.125338	0.881382
ARPC5L	19.562	-0.92513	0.507685	-1.82225	0.068417	0.738142
ARPP19	13.8487	-0.975898	0.579785	-1.68321	0.0923347	0.81377
ARRB1	11.4769	-1.77287	1.40052	-1.26586	0.205562	0.979544
ARRDC3	10.3138	-0.476101	0.784427	-0.606941	0.54389	0.998477
ARSA	4.72647	-0.687052	0.95787	-0.717271	0.473207	0.998477
ARSB	3.0416	-0.338067	1.7831	-0.189595	0.849627	0.998477
ARSK	7.38549	-1.58381	1.17926	-1.34305	0.179256	0.955709
ARV1	32.4235	0.0262049	1.00904	0.0259703	0.979281	0.998477
ASAH1	138.304	0.0950075	0.442491	0.214711	0.829993	0.998477
ASAP1	9.51252	-0.792929	0.733291	-1.08133	0.279551	0.998477
ASAP3	9.266	0.0625283	1.34511	0.0464857	0.962923	0.998477
ASB1	5.01517	-0.713673	1.29083	-0.552879	0.580346	0.998477
ASB13	7.18317	0.294061	1.02377	0.287235	0.773933	0.998477
ASB8	9.5953	0.679722	0.79526	0.854717	0.392708	0.998477
ASCC1	44.9835	0.376772	0.368977	1.02113	0.307194	0.998477
ASCC2	71.1268	-0.325079	0.332718	-0.977042	0.328548	0.998477
ASCC3	6.19917	-0.78601	1.03117	-0.762252	0.445909	0.998477
ASF1A	20.1982	-0.412001	0.624123	-0.660128	0.509172	0.998477
ASH2L	39.1955	0.285342	0.56568	0.504422	0.613965	0.998477
ASL	9.70892	0.305232	1.04515	0.292046	0.770252	0.998477
ASMTL	12.0954	-0.883612	1.29689	-0.681331	0.495662	0.998477
ASNA1	86.8256	-0.340538	0.28451	-1.19693	0.231335	0.998477
ASNS	208.715	0.168232	0.224869	0.748134	0.45438	0.998477
ASNSD1	24.7377	-0.143096	0.537115	-0.266417	0.789918	0.998477
ASNSP1	26.7484	0.347899	0.448689	0.775368	0.438122	0.998477
ASNSP6	4.92945	0.0404947	0.915704	0.0442224	0.964727	0.998477
ASPA	5.52373	-0.0399714	1.32043	-0.0302714	0.975851	0.998477
ASPH	28.1562	1.3049	0.483139	2.70088	0.00691564	0.250754
ASPN	38.8608	-0.61603	0.40647	-1.51556	0.129631	0.890747
ASS1	11.3523	-0.0941471	0.671184	-0.14027	0.888447	0.998477
ASS1P1	59.8136	0.42732	0.286689	1.49053	0.136085	0.898712
ASS1P11	79.9701	0.41735	0.245593	1.69936	0.0892518	0.807665
ASS1P12	22.62	0.152376	0.419248	0.363452	0.716268	0.998477
ASS1P5	56.4226	0.346114	0.302363	1.1447	0.252334	0.998477
ASS1P9	47.5922	0.35134	0.298038	1.17884	0.23846	0.998477
ASTE1	9.03267	-0.732482	0.819412	-0.893911	0.37137	0.998477
ASTN2	8.08811	0.0627243	1.60963	0.0389681	0.968916	0.998477
ASUN	49.2236	0.0914011	0.583969	0.156517	0.875626	0.998477
ASXL2	2.79357	-3.67616	2.29601	-1.60111	0.109353	0.849918
ATAD1	43.2026	-0.109632	0.410472	-0.267088	0.789401	0.998477
ATAD3A	3.44217	-0.0459046	1.77062	-0.0259257	0.979317	0.998477
ATE1	7.98759	-0.890442	0.984969	-0.904031	0.365979	0.998477
ATF1	18.7345	0.37169	0.52299	0.710701	0.477269	0.998477
ATF2	21.7941	-0.114471	0.992556	-0.11533	0.908184	0.998477
ATF3	4.99812	1.82872	1.61402	1.13302	0.257205	0.998477
ATF4	136.434	1.20609	0.343921	3.50687	0.000453417	0.0486683
ATF4P3	26.8365	1.35384	0.54275	2.49442	0.0126164	0.33597
ATF5	14.5142	1.29279	0.678474	1.90543	0.0567236	0.702646
ATF6	27.9237	0.584277	1.1846	0.493228	0.621852	0.998477
ATF6B	13.2336	0.208579	0.601648	0.34668	0.728831	0.998477
ATF7IP	6.63257	-2.48351	1.21391	-2.04588	0.0407681	0.618299
ATG10	11.1102	0.0263036	0.789915	0.0332993	0.973436	0.998477
ATG101	21.4468	0.337738	0.449039	0.752136	0.451969	0.998477
ATG12	16.8621	-0.203371	0.516238	-0.393948	0.693619	0.998477
ATG13	35.0416	0.422388	0.446062	0.946925	0.343677	0.998477
ATG14	3.85322	1.18552	1.73262	0.684233	0.493828	0.998477
ATG16L1	16.9582	0.0925969	1.65893	0.0558173	0.955487	0.998477
ATG3	72.8715	0.0659383	0.362548	0.181875	0.855681	0.998477
ATG4A	16.8025	-0.755138	0.680407	-1.10983	0.267071	0.998477
ATG4B	54.9278	-0.403383	0.63846	-0.631806	0.527514	0.998477
ATG4C	24.6859	-0.249847	0.535423	-0.466635	0.640761	0.998477
ATG5	15.5641	-0.128783	0.854306	-0.150745	0.880177	0.998477
ATG7	81.6902	0.0827337	0.703446	0.117612	0.906375	0.998477
ATG9A	12.347	-0.122752	0.89589	-0.137016	0.891018	0.998477
ATIC	207.307	0.534279	0.261008	2.04698	0.0406603	0.618299
ATL1	32.0606	1.0561	0.807918	1.30719	0.191149	0.96228
ATL2	4.20159	-0.499879	1.97423	-0.253202	0.800112	0.998477
ATL3	22.2575	1.23621	1.04142	1.18704	0.235212	0.998477
ATP10A	3.37431	0.884014	1.8536	0.476918	0.63342	0.998477
ATP10D	4.78527	0.157727	1.74392	0.0904438	0.927935	0.998477
ATP11B	6.90369	2.46331	2.04151	1.20661	0.227581	0.998477
ATP13A1	3.91601	-0.907533	1.89987	-0.477681	0.632877	0.998477
ATP1A1	72.9526	-0.808059	0.436307	-1.85204	0.0640196	0.728245
ATP1B1	3.33159	-1.19391	1.81201	-0.658883	0.509971	0.998477
ATP1B3	16.8751	0.109451	0.507162	0.21581	0.829136	0.998477
ATP1B3P1	15.5574	0.0206972	0.51371	0.0402897	0.967862	0.998477
ATP23	6.11181	0.671545	1.03135	0.651131	0.514962	0.998477
ATP2A2	4.38631	0.459146	1.42704	0.321747	0.747645	0.998477
ATP2B1	5.2023	0.317484	1.00432	0.316117	0.751914	0.998477
ATP2B4	5.99599	-1.75634	1.3124	-1.33826	0.180811	0.957136
ATP2C1	51.6056	-0.623748	0.459435	-1.35764	0.174577	0.953406
ATP5A1	115.183	-0.247706	0.221685	-1.11738	0.263833	0.998477
ATP5A1P10	21.3664	-0.393194	0.469956	-0.836661	0.402783	0.998477
ATP5A1P3	84.4469	-0.199573	0.249891	-0.798642	0.424498	0.998477
ATP5A1P5	17.7236	-0.503543	0.563916	-0.892939	0.37189	0.998477
ATP5A1P7	24.1684	-0.525747	0.464282	-1.13239	0.257472	0.998477
ATP5A1P8	20.4199	-0.489381	0.51016	-0.959269	0.337423	0.998477
ATP5B	158.366	0.469883	0.255633	1.83812	0.0660453	0.731743
ATP5BP1	10.2696	0.269423	0.636186	0.423497	0.671933	0.998477
ATP5C1	42.47	-0.458014	0.385662	-1.18761	0.234989	0.998477
ATP5C1P1	53.4006	-0.491386	0.29717	-1.65355	0.0982182	0.825747
ATP5D	9.70364	0.36591	0.750502	0.487554	0.625866	0.998477
ATP5F1	109.58	-0.271434	0.315095	-0.861437	0.388998	0.998477
ATP5F1P3	8.08136	-0.308797	0.864175	-0.357332	0.720843	0.998477
ATP5F1P6	4.9488	0.568923	0.941884	0.604027	0.545826	0.998477
ATP5F1P7	4.18992	-0.912887	1.30909	-0.697343	0.485588	0.998477
ATP5G2	10.5848	0.0784711	0.7467	0.10509	0.916304	0.998477
ATP5G2P1	3.20907	-0.680415	1.14055	-0.596566	0.550797	0.998477
ATP5G2P4	5.27771	-0.105358	0.980672	-0.107434	0.914445	0.998477
ATP5G3	25.7341	0.594325	0.513766	1.1568	0.247353	0.998477
ATP5H	2.81855	0.399538	1.20531	0.331482	0.74028	0.998477
ATP5HP4	3.15554	0.463054	1.02753	0.450647	0.652244	0.998477
ATP5J	3.75852	-1.06206	1.0743	-0.988606	0.322856	0.998477
ATP5L	9.05304	0.0192	0.640261	0.0299878	0.976077	0.998477
ATP5LP2	7.56898	-0.0963771	0.678987	-0.141943	0.887125	0.998477
ATP5O	9.03134	-0.0376135	0.64846	-0.0580043	0.953745	0.998477
ATP5S	4.304	-2.94742	1.67188	-1.76294	0.0779114	0.761488
ATP5SL	20.9788	-0.305609	0.417793	-0.731484	0.464484	0.998477
ATP6AP1	81.9626	-0.0756266	0.379262	-0.199405	0.841946	0.998477
ATP6AP2	113.689	0.155565	0.323552	0.480804	0.630656	0.998477
ATP6V0A1	29.7197	0.676263	0.668228	1.01203	0.311526	0.998477
ATP6V0A2	11.8743	0.52855	1.74924	0.30216	0.76253	0.998477
ATP6V0B	42.1375	-0.273626	0.369272	-0.740988	0.458701	0.998477
ATP6V0D1	130.314	0.449159	0.26548	1.69187	0.0906698	0.809629
ATP6V0E1	107.068	-0.105695	0.239397	-0.441503	0.658849	0.998477
ATP6V0E1P2	9.83952	-0.342893	0.642132	-0.533992	0.593347	0.998477
ATP6V0E2	5.8526	-0.160126	0.804146	-0.199125	0.842165	0.998477
ATP6V1A	23.8811	-0.0630387	0.742595	-0.0848898	0.932349	0.998477
ATP6V1B2	85.1156	-0.643652	0.359358	-1.79112	0.0732747	0.747009
ATP6V1C1	41.6407	0.173843	0.412578	0.421357	0.673494	0.998477
ATP6V1D	115.451	0.428184	0.277625	1.54231	0.122998	0.878761
ATP6V1E1	28.8843	0.298354	0.377284	0.790793	0.429065	0.998477
ATP6V1E1P1	18.1211	0.409473	0.530686	0.771592	0.440356	0.998477
ATP6V1F	3.88002	-0.197786	1.10674	-0.178711	0.858165	0.998477
ATP6V1G1	117.033	-0.597901	0.234091	-2.55413	0.0106452	0.313262
ATP6V1H	114.471	0.902373	0.681907	1.32331	0.185733	0.958624
ATP8A1	8.54046	6.50849	2.84115	2.2908	0.0219752	0.467457
ATP8B2	3.92562	0.631782	1.41143	0.447618	0.654429	0.998477
ATP9A	7.24246	1.70773	1.9301	0.884789	0.376271	0.998477
ATP9B	9.89112	-3.69426	1.59241	-2.31992	0.0203451	0.453963
ATPAF1	31.9641	-1.27843	0.522569	-2.44643	0.0144279	0.357532
ATPAF2	23.5295	-0.282251	0.659619	-0.4279	0.668724	0.998477
ATRAID	135.275	-0.399197	0.271926	-1.46804	0.142095	0.908019
ATRIP	5.77125	1.39472	2.3594	0.591133	0.554431	0.998477
ATRN	11.1685	5.19419	1.56309	3.32302	0.000890471	0.0723241
ATRX	7.18795	-2.43721	1.36157	-1.79	0.0734535	0.747009
ATXN1	5.13936	-1.26006	1.02254	-1.23228	0.217843	0.991059
ATXN10	152.452	0.318303	0.329723	0.965365	0.334362	0.998477
ATXN2	5.69468	-2.19254	1.84172	-1.19048	0.233856	0.998477
ATXN3	17.3817	-0.177549	0.881878	-0.20133	0.84044	0.998477
ATXN7L2	3.28315	0.158927	2.67008	0.0595213	0.952537	0.998477
AUH	5.68438	0.537891	1.44423	0.372441	0.709564	0.998477
AUP1	6.44236	0.152907	0.797843	0.19165	0.848016	0.998477
AURKAIP1	6.6048	-0.376468	0.751387	-0.50103	0.61635	0.998477
AVL9	14.7022	0.150971	0.995603	0.151638	0.879473	0.998477
AVPI1	11.3687	1.29937	0.72715	1.78694	0.0739467	0.747009
AXL	24.865	-0.801161	0.92128	-0.869618	0.384509	0.998477
AZI2	78.4052	-0.00289274	0.321605	-0.00899472	0.992823	0.999601
AZIN1	64.9024	0.60516	0.422822	1.43124	0.152361	0.924872
AZIN2	9.45165	1.28679	1.36268	0.944304	0.345014	0.998477
B2M	1346.86	-0.190281	0.178498	-1.06601	0.28642	0.998477
B3GALNT1	3.44171	0.300518	1.51901	0.197838	0.843172	0.998477
B3GAT3	14.3606	1.26978	0.755709	1.68026	0.0929075	0.815681
B3GLCT	4.24553	-1.97489	2.58147	-0.765025	0.444257	0.998477
B3GNTL1	9.54302	-1.17537	0.853076	-1.3778	0.168264	0.937983
B4GALT1	25.9735	-0.0229502	0.447105	-0.0513306	0.959062	0.998477
B4GALT2	5.72811	0.291282	1.30006	0.224053	0.822716	0.998477
B4GALT3	8.63707	-0.119057	0.840524	-0.141646	0.887359	0.998477
B4GALT4	34.8338	0.617292	0.443871	1.3907	0.164316	0.936217
B4GALT7	11.552	-0.0368931	0.800648	-0.0460791	0.963247	0.998477
B4GAT1	2.85993	1.1215	1.13473	0.988349	0.322982	0.998477
B9D1	17.7849	0.362616	0.511443	0.709006	0.478321	0.998477
BABAM1	14.4917	0.239454	0.615535	0.389018	0.697263	0.998477
BACE1	4.26752	1.70617	1.23209	1.38477	0.166122	0.936217
BACE2	19.7537	0.991561	0.612538	1.61878	0.105496	0.840858
BACH1	6.72797	-0.528989	1.04439	-0.506505	0.612502	0.998477
BAD	4.92658	-0.305385	0.936656	-0.326037	0.744396	0.998477
BAG1	15.928	0.244748	0.644188	0.379932	0.703996	0.998477
BAG2	20.3886	0.255891	0.591058	0.432937	0.665061	0.998477
BAG3	16.1294	0.0804881	1.00099	0.0804088	0.935912	0.998477
BAG5	3.2608	0.298385	1.09807	0.271736	0.785825	0.998477
BAG6	6.14623	0.599393	0.877891	0.682765	0.494756	0.998477
BAIAP2	10.0496	1.24459	1.2192	1.02083	0.307336	0.998477
BAIAP2L1	8.27905	-0.0369337	1.54013	-0.0239809	0.980868	0.998477
BAK1	3.71578	-0.818642	1.11605	-0.733517	0.463243	0.998477
BAK1P1	3.45396	-0.622423	1.14734	-0.542494	0.587478	0.998477
BANF1	11.3749	0.271784	0.605837	0.448609	0.653714	0.998477
BANF1P3	6.52721	0.519971	0.830592	0.626025	0.531299	0.998477
BANK1	8.05298	-3.32672	2.90983	-1.14327	0.252926	0.998477
BANP	7.11609	5.33257	1.84703	2.8871	0.00388805	0.181592
BAP1	4.04263	-2.29362	1.38736	-1.65322	0.098286	0.825747
BASP1	11.4369	0.16717	0.784714	0.213033	0.831301	0.998477
BAX	45.3515	-0.28524	0.393039	-0.72573	0.468005	0.998477
BBOF1	6.22772	0.464318	0.994892	0.466702	0.640713	0.998477
BBS2	78.6112	-0.132116	0.42885	-0.308072	0.758028	0.998477
BBS4	51.9346	0.75068	0.538843	1.39313	0.16358	0.936217
BBS7	32.1055	0.384767	0.716793	0.53679	0.591413	0.998477
BBS9	38.1465	0.81301	0.807763	1.0065	0.314177	0.998477
BBX	3.38839	1.65289	1.85782	0.889694	0.37363	0.998477
BCAP29	93.5224	-0.622307	0.338761	-1.83701	0.0662086	0.731743
BCAP31	311.992	0.389704	0.307701	1.2665	0.205333	0.979544
BCAP31P1	40.307	0.393326	0.447847	0.87826	0.379803	0.998477
BCAP31P2	52.7217	0.280709	0.401321	0.699462	0.484263	0.998477
BCAR3	23.1327	-0.389538	0.674616	-0.577423	0.563654	0.998477
BCAS2	31.6623	-0.670898	0.504048	-1.33102	0.183182	0.958624
BCAS2P1	6.54066	-0.327439	0.982381	-0.333312	0.738899	0.998477
BCAS2P2	6.33009	0.0788	0.845107	0.0932426	0.925711	0.998477
BCAS3	22.2699	-0.354773	1.12056	-0.316603	0.751545	0.998477
BCAS4	7.91789	0.121587	0.764956	0.158946	0.873711	0.998477
BCAT1	37.4995	1.22348	0.449948	2.71915	0.00654498	0.243845
BCAT2	16.9182	0.416341	0.528207	0.788216	0.430571	0.998477
BCCIP	80.1934	-0.239596	0.395642	-0.605589	0.544788	0.998477
BCHE	3.56919	0.701275	2.19941	0.318846	0.749843	0.998477
BCKDHA	5.43174	-0.390546	1.0146	-0.384927	0.700292	0.998477
BCKDHB	26.4277	-0.794844	0.88088	-0.902329	0.366882	0.998477
BCKDK	8.3533	0.634124	0.846524	0.749091	0.453802	0.998477
BCL10	17.4026	-0.205628	0.716644	-0.286931	0.774165	0.998477
BCL2L1	11.9019	0.285279	0.628826	0.45367	0.650066	0.998477
BCL2L13	11.7144	-0.186454	0.879362	-0.212034	0.832081	0.998477
BCL6	4.22731	0.333732	1.8774	0.177763	0.858909	0.998477
BCL7A	3.27561	5.12365	2.90033	1.76657	0.0772996	0.760055
BCL7B	16.1043	-0.35829	0.769597	-0.465556	0.641533	0.998477
BCR	10.4149	0.552617	1.07306	0.514992	0.606559	0.998477
BCS1L	7.3284	0.0462464	0.749142	0.0617324	0.950776	0.998477
BDH2	6.2169	-0.0180099	1.02188	-0.0176243	0.985939	0.998477
BDH2P1	14.0209	0.501034	0.529689	0.945902	0.344199	0.998477
BDNF-AS	4.29022	-2.48841	1.73994	-1.43017	0.152669	0.924971
BECN1	81.3544	-0.842525	0.369971	-2.27727	0.0227699	0.477875
BEND6	21.828	0.364815	0.57823	0.630917	0.528095	0.998477
BET1	22.655	-0.143182	0.403382	-0.354953	0.722625	0.998477
BET1L	2.78652	0.0774694	1.15108	0.0673013	0.946342	0.998477
BEX3	24.3492	-0.225889	0.4676	-0.483081	0.629038	0.998477
BEX4	25.1947	-0.564095	0.529977	-1.06438	0.287158	0.998477
BFAR	64.4281	0.456422	0.501847	0.909483	0.363095	0.998477
BGN	177.993	-0.569922	0.265481	-2.14675	0.0318128	0.556148
BHLHE40	30.8147	-0.462062	0.449328	-1.02834	0.30379	0.998477
BHMT2	8.98117	-0.633976	0.7428	-0.853496	0.393385	0.998477
BICC1	15.709	0.445114	0.907667	0.490393	0.623856	0.998477
BICD1	3.66884	5.26902	2.42565	2.17221	0.0298399	0.548325
BID	21.0223	-0.671673	0.484357	-1.38673	0.165523	0.936217
BIN1	40.2598	1.74652	1.01121	1.72716	0.0841396	0.783015
BIN3	26.1725	0.370372	0.490686	0.754803	0.450367	0.998477
BIRC2	19.376	-0.813459	0.615913	-1.32074	0.186589	0.958624
BIRC6	9.07239	1.20141	1.61299	0.744836	0.456371	0.998477
BLCAP	18.1687	-0.0823647	0.47391	-0.173798	0.862024	0.998477
BLMH	34.8496	-0.0580391	1.31891	-0.0440053	0.9649	0.998477
BLOC1S2	111.452	0.122144	0.401484	0.304231	0.760952	0.998477
BLOC1S2P1	6.04518	0.463899	1.00159	0.463161	0.643249	0.998477
BLOC1S6	5.36026	-1.09753	1.17106	-0.937211	0.34865	0.998477
BLVRA	99.149	0.200155	0.274504	0.72915	0.46591	0.998477
BLVRB	38.9203	0.344054	0.60562	0.568102	0.569966	0.998477
BLZF1	26.6289	-0.482292	0.614788	-0.784485	0.432755	0.998477
BMI1	4.32015	-0.268729	0.952447	-0.282146	0.777832	0.998477
BMP1	45.378	0.19368	0.700294	0.276569	0.782111	0.998477
BMPER	12.392	-0.21394	1.36902	-0.156273	0.875818	0.998477
BMPR1A	4.00663	-1.15707	1.00099	-1.15593	0.247712	0.998477
BMPR2	3.45351	-2.95433	1.57954	-1.87038	0.0614312	0.717855
BMS1	30.6998	-0.631675	0.766489	-0.824115	0.409874	0.998477
BMS1P10	3.99826	-0.411951	1.13456	-0.363094	0.716535	0.998477
BMS1P11	2.77878	-0.263069	1.21354	-0.216778	0.828382	0.998477
BMS1P15	5.72177	0.489076	0.813673	0.601071	0.547792	0.998477
BMS1P16	5.95364	0.138341	0.800625	0.172792	0.862815	0.998477
BMT2	7.45159	-0.767813	1.28102	-0.599375	0.548923	0.998477
BNIP1	20.2327	1.09869	0.829971	1.32377	0.185579	0.958624
BNIP2	53.8554	-0.664332	0.556196	-1.19442	0.232314	0.998477
BNIP3	7.32665	-0.095426	0.76253	-0.125144	0.90041	0.998477
BNIP3L	132.679	-0.382414	0.192435	-1.98724	0.0468961	0.646121
BNIP3P1	20.6451	-0.472153	0.420086	-1.12394	0.261038	0.998477
BOC	15.6142	-0.183302	0.825271	-0.222111	0.824227	0.998477
BOD1	13.28	-0.16537	0.650134	-0.254362	0.799216	0.998477
BOLA2B	5.11585	-0.400544	0.971706	-0.412207	0.680188	0.998477
BORCS5	4.38103	-0.693722	1.45863	-0.475599	0.63436	0.998477
BPGM	19.4356	0.233202	0.545958	0.427143	0.669275	0.998477
BPHL	15.6681	-0.259584	0.93703	-0.277029	0.781758	0.998477
BPNT1	8.35426	0.562571	1.26024	0.446399	0.655309	0.998477
BPTF	5.14025	0.409017	1.39927	0.292308	0.770051	0.998477
BRAP	15.8702	-1.84063	0.908294	-2.02647	0.0427163	0.626249
BRCC3	3.35048	-0.238475	1.17397	-0.203135	0.839029	0.998477
BRD2	5.48264	0.321986	1.07414	0.299763	0.764358	0.998477
BRD8	23.1518	-0.00357679	0.567276	-0.0063052	0.994969	0.99977
BRD9	18.9022	0.984922	0.817965	1.20411	0.228546	0.998477
BRE	93.7156	-0.182308	0.290265	-0.628075	0.529955	0.998477
BRF2	4.77	1.04754	1.05259	0.995198	0.31964	0.998477
BRIX1	25.4488	-0.311507	0.693762	-0.449012	0.653423	0.998477
BRIX1P1	6.66706	-0.0543383	0.893928	-0.060786	0.95153	0.998477
BRK1	113.668	0.160885	0.334823	0.480507	0.630867	0.998477
BRMS1	21.2208	0.358054	0.436834	0.819658	0.412411	0.998477
BRMS1L	15.9758	-1.06075	0.939247	-1.12936	0.258744	0.998477
BROX	21.6576	0.6267	1.06476	0.588582	0.556142	0.998477
BSDC1	32.3196	-0.40535	0.40758	-0.994529	0.319965	0.998477
BSG	303.237	-0.128883	0.167373	-0.770037	0.441278	0.998477
BST1	25.8731	-0.0353724	0.681312	-0.051918	0.958594	0.998477
BTBD1	18.6896	-0.137759	0.766133	-0.179811	0.857301	0.998477
BTBD10	20.0786	-0.593734	0.56197	-1.05652	0.29073	0.998477
BTBD10P1	6.51713	-0.058221	0.754907	-0.0771233	0.938525	0.998477
BTBD7	3.25287	-1.51622	1.95686	-0.774826	0.438442	0.998477
BTD	13.3266	-0.322623	0.654891	-0.492635	0.62227	0.998477
BTF3	75.8742	-0.123658	0.292113	-0.423323	0.67206	0.998477
BTF3L4	14.0951	-0.438772	0.72424	-0.605837	0.544623	0.998477
BTF3L4P1	5.03925	-0.394776	1.022	-0.386279	0.69929	0.998477
BTF3L4P2	18.0321	-0.512282	0.490895	-1.04357	0.296685	0.998477
BTF3P10	13.1637	-0.105299	0.74295	-0.141731	0.887292	0.998477
BTF3P12	12.9494	-0.0249167	0.642107	-0.0388045	0.969046	0.998477
BTF3P13	5.75128	0.428471	0.844676	0.50726	0.611972	0.998477
BTF3P4	44.3926	-0.195645	0.417391	-0.468733	0.639261	0.998477
BTF3P5	120.849	-0.104405	0.225188	-0.463633	0.642911	0.998477
BTG1	8.47543	0.927764	0.894361	1.03735	0.299574	0.998477
BTG3	21.4633	0.106446	0.559429	0.190275	0.849093	0.998477
BTN2A1	4.48027	0.0772881	1.44767	0.053388	0.957423	0.998477
BTN3A1	10.0137	-1.54816	0.770902	-2.00824	0.044618	0.639131
BTN3A2	10.8793	-0.100405	0.878142	-0.114338	0.90897	0.998477
BTN3A3	15.6623	-0.814146	0.687535	-1.18415	0.236353	0.998477
BTRC	7.0416	0.0725742	2.31902	0.0312952	0.975034	0.998477
BUB3	58.3997	-0.227477	0.401514	-0.566549	0.57102	0.998477
BUB3P1	22.6493	-0.364988	0.451216	-0.808898	0.418574	0.998477
BUD13	12.5315	0.100954	1.72329	0.0585821	0.953285	0.998477
BUD31	91.7539	-0.360997	0.249172	-1.44878	0.147398	0.916392
BX255923.2	4.54306	-0.597241	0.859992	-0.694473	0.487386	0.998477
BYSL	7.28725	-0.196796	0.958966	-0.205217	0.837403	0.998477
BZW1	49.6002	-0.044936	0.289687	-0.155119	0.876727	0.998477
BZW1P2	36.9578	0.00566755	0.331796	0.0170814	0.986372	0.998477
BZW2	64.7761	0.247162	0.528988	0.467235	0.640332	0.998477
C10orf11	6.28068	0.749957	1.3397	0.559793	0.575621	0.998477
C10orf54	13.2983	-0.820236	0.763385	-1.07447	0.282611	0.998477
C10orf76	13.6195	2.61998	1.45345	1.80259	0.0714528	0.747009
C10orf88	3.82114	-0.732639	1.74423	-0.420035	0.67446	0.998477
C11orf24	22.1166	-0.449997	0.58421	-0.770265	0.441143	0.998477
C11orf49	73.7005	-0.0881154	0.359712	-0.244961	0.806486	0.998477
C11orf54	32.851	-0.666059	0.488041	-1.36476	0.172329	0.947011
C11orf57	9.07724	0.43404	1.45574	0.298158	0.765583	0.998477
C11orf58	73.0155	-0.356324	0.30672	-1.16172	0.245348	0.998477
C11orf68	2.85606	1.19226	1.29432	0.921147	0.356973	0.998477
C11orf70	7.70885	-0.484281	1.05881	-0.457384	0.647395	0.998477
C11orf74	3.4404	-1.08209	1.03433	-1.04617	0.295484	0.998477
C12orf10	26.4564	-0.0709763	0.453129	-0.156636	0.875532	0.998477
C12orf29	25.7391	-0.0130648	0.582223	-0.0224395	0.982097	0.998477
C12orf4	12.3961	-1.20043	1.67216	-0.717888	0.472826	0.998477
C12orf43	5.65616	0.101602	1.00786	0.10081	0.919701	0.998477
C12orf45	3.14904	-0.0210404	1.29931	-0.0161936	0.98708	0.998477
C12orf65	14.3812	0.129798	0.678041	0.191431	0.848188	0.998477
C12orf75	26.9459	-0.230289	0.42246	-0.545116	0.585674	0.998477
C14orf1	67.8981	0.28097	0.316629	0.887378	0.374875	0.998477
C14orf119	24.4819	-0.30731	0.464407	-0.661724	0.508148	0.998477
C14orf159	65.2432	-0.168652	0.395907	-0.425989	0.670116	0.998477
C14orf166	101.633	0.202971	0.302014	0.672059	0.501546	0.998477
C14orf2	3.00973	-0.302991	1.43916	-0.210534	0.833251	0.998477
C14orf28	3.84371	-0.873492	3.17634	-0.275	0.783317	0.998477
C14orf37	6.43109	0.274256	1.34218	0.204335	0.838091	0.998477
C14orf93	5.18256	1.03468	1.47129	0.703243	0.481904	0.998477
C15orf40	13.2422	-0.621626	0.681148	-0.912615	0.361445	0.998477
C15orf41	10.0692	0.320738	1.41216	0.227126	0.820326	0.998477
C15orf57	5.56766	0.61577	1.27334	0.483588	0.628679	0.998477
C16orf45	24.8603	-0.644563	0.412299	-1.56334	0.117973	0.86801
C16orf58	4.49736	-0.434442	1.36588	-0.318067	0.750434	0.998477
C16orf62	187.226	0.360475	0.367994	0.979569	0.327299	0.998477
C16orf70	8.85955	0.329652	1.03734	0.317787	0.750647	0.998477
C16orf72	4.14104	-0.41726	1.16529	-0.358075	0.720288	0.998477
C16orf87	7.20089	1.13609	0.894667	1.26984	0.204141	0.977614
C16orf89	3.18264	1.15362	2.38417	0.483865	0.628482	0.998477
C16orf91	4.03321	-0.499006	0.936673	-0.532743	0.594212	0.998477
C17orf51	6.5564	-0.10876	1.14126	-0.0952981	0.924078	0.998477
C17orf62	19.0063	-0.228093	0.4628	-0.492854	0.622116	0.998477
C17orf75	12.9839	-1.76098	1.30807	-1.34625	0.178223	0.955709
C17orf80	6.06493	-0.388859	0.937145	-0.41494	0.678186	0.998477
C18orf21	7.79674	1.21238	1.06143	1.14221	0.253366	0.998477
C18orf32	6.66444	-0.0407805	0.749304	-0.0544245	0.956597	0.998477
C18orf8	25.0069	0.729474	1.08669	0.671283	0.50204	0.998477
C19orf12	10.9705	0.603268	0.595759	1.0126	0.311249	0.998477
C19orf24	11.5296	-0.09248	0.600444	-0.154019	0.877594	0.998477
C19orf25	3.32358	-0.492121	1.11356	-0.441936	0.658535	0.998477
C19orf43	20.1458	0.196742	0.568047	0.346349	0.729081	0.998477
C19orf47	7.96058	0.599673	1.07677	0.556919	0.577583	0.998477
C19orf48	11.6094	0.143171	0.615022	0.23279	0.815924	0.998477
C19orf53	6.44272	0.55531	0.945561	0.587282	0.557015	0.998477
C19orf54	2.75308	-2.16593	1.37033	-1.58058	0.113973	0.859851
C19orf60	6.1998	0.683238	1.15535	0.591368	0.554274	0.998477
C19orf66	4.07941	0.435965	1.12481	0.387588	0.698321	0.998477
C1D	12.2745	-0.379661	0.63659	-0.596398	0.550909	0.998477
C1GALT1	18.2521	0.0498187	0.606662	0.0821193	0.934552	0.998477
C1GALT1C1	6.73227	0.124262	1.03871	0.119632	0.904775	0.998477
C1orf109	5.91558	-0.403924	1.13507	-0.35586	0.721946	0.998477
C1orf123	33.7121	-0.271672	0.343227	-0.791524	0.428638	0.998477
C1orf131	27.4229	-0.604013	0.659648	-0.91566	0.359845	0.998477
C1orf174	19.0952	-0.146407	0.589717	-0.248266	0.803929	0.998477
C1orf198	16.9943	-0.109407	0.636898	-0.171781	0.86361	0.998477
C1orf21	16.7251	-0.782124	0.977032	-0.80051	0.423415	0.998477
C1orf216	5.05863	0.0404	1.18244	0.0341667	0.972744	0.998477
C1orf27	25.1548	-0.643303	0.853894	-0.753375	0.451224	0.998477
C1orf43	143.82	0.325709	0.312095	1.04362	0.29666	0.998477
C1orf52	19.4448	-0.0577914	0.493978	-0.116992	0.906867	0.998477
C1QBP	37.3656	-0.39847	0.573934	-0.694279	0.487508	0.998477
C1QBPP1	3.17907	-0.648998	1.04136	-0.623218	0.533141	0.998477
C1QTNF6	2.99872	-1.23213	1.30612	-0.943345	0.345504	0.998477
C1R	149.69	-0.486087	0.262057	-1.85489	0.0636122	0.726605
C1RL	3.1715	-0.54264	1.47025	-0.36908	0.712068	0.998477
C1S	687.929	-0.586133	0.185301	-3.16314	0.00156075	0.0975106
C20orf194	11.1394	-0.881384	0.63288	-1.39266	0.163724	0.936217
C20orf24	13.4369	0.00580467	0.620027	0.00936196	0.99253	0.999601
C20orf27	29.0511	1.2436	0.491964	2.52783	0.011477	0.318143
C20orf96	7.9609	0.690109	1.36939	0.503955	0.614293	0.998477
C21orf33	115.621	0.0377428	0.435233	0.0867188	0.930895	0.998477
C21orf59	7.12981	-0.551499	0.760628	-0.725057	0.468417	0.998477
C2CD5	26.4286	0.347181	0.937294	0.370408	0.711078	0.998477
C2orf27A	4.73854	-0.588611	1.28819	-0.456929	0.647722	0.998477
C2orf42	9.61507	0.239415	0.84476	0.283412	0.776861	0.998477
C2orf49	5.10891	0.344474	1.1261	0.305899	0.759682	0.998477
C2orf68	4.33069	-0.892072	0.998039	-0.893825	0.371416	0.998477
C2orf74	2.84494	0.633253	1.16308	0.544461	0.586124	0.998477
C3	3.24809	1.27355	1.87334	0.679827	0.496614	0.998477
C3orf14	15.9679	-0.152635	1.22951	-0.124143	0.901202	0.998477
C3orf18	7.1068	1.10827	1.16727	0.949457	0.342388	0.998477
C3orf33	12.0154	-0.0854684	0.85442	-0.100031	0.92032	0.998477
C3orf38	16.5231	0.410096	0.660773	0.620631	0.534842	0.998477
C4orf3	26.2006	-1.23905	0.453421	-2.73268	0.00628208	0.238425
C4orf33	5.95631	-1.35046	1.262	-1.0701	0.284575	0.998477
C5	6.14062	1.17567	3.03575	0.387274	0.698553	0.998477
C5orf15	48.7339	-0.271951	0.513427	-0.529678	0.596335	0.998477
C5orf22	16.0337	-0.533339	0.823302	-0.647805	0.517111	0.998477
C5orf30	10.8603	1.25833	0.840494	1.49713	0.134359	0.898712
C5orf34	3.31971	-5.33004	2.66543	-1.9997	0.045533	0.641169
C5orf42	4.05998	-2.94365	1.71019	-1.72124	0.0852081	0.784648
C5orf51	5.24253	1.61952	1.52664	1.06084	0.288763	0.998477
C6orf1	15.4627	0.976635	0.705945	1.38344	0.166529	0.936217
C6orf106	3.91112	0.975577	1.11287	0.876631	0.380687	0.998477
C6orf203	19.3387	-1.08774	0.575332	-1.89064	0.0586729	0.713438
C6orf48	33.0827	0.687912	0.566725	1.21384	0.22481	0.996748
C6orf62	17.2776	0.352208	0.581646	0.605537	0.544822	0.998477
C6orf89	43.2051	0.163469	0.628972	0.259898	0.794942	0.998477
C7	4.52792	-5.78719	3.42732	-1.68854	0.0913069	0.811373
C7orf26	4.42542	1.74172	1.90945	0.912156	0.361686	0.998477
C7orf49	2.7699	-0.568079	1.37693	-0.41257	0.679922	0.998477
C7orf50	20.4596	-0.265587	0.574485	-0.462304	0.643863	0.998477
C7orf73	38.4329	0.380179	0.446647	0.851185	0.394666	0.998477
C8orf33	7.60327	-0.431814	0.753432	-0.573129	0.566557	0.998477
C8orf37	3.64961	0.812351	1.85679	0.437502	0.661747	0.998477
C8orf76	16.9193	0.969641	0.577728	1.67837	0.0932748	0.815681
C9orf3	7.74046	-1.426	1.57747	-0.903978	0.366007	0.998477
C9orf64	11.9239	1.18967	0.917614	1.29648	0.19481	0.96228
C9orf72	3.40085	-3.22598	2.3555	-1.36955	0.170827	0.945132
C9orf78	67.6827	0.00311624	0.405368	0.00768744	0.993866	0.999601
C9orf85	10.3935	0.299966	0.830676	0.361111	0.718016	0.998477
CA12	17.2324	2.04107	0.592107	3.44714	0.000566557	0.0541362
CA5B	14.1598	0.566746	0.771017	0.735064	0.462301	0.998477
CA5BP1	5.08331	0.30694	1.18209	0.259658	0.795128	0.998477
CAB39	3.60246	2.86454	1.42288	2.0132	0.0440941	0.634908
CAB39L	9.34104	-0.797825	1.97908	-0.403128	0.686854	0.998477
CABLES1	3.62635	0.786961	2.08421	0.377582	0.705741	0.998477
CABYR	2.85076	1.99278	2.53361	0.78654	0.431551	0.998477
CACFD1	6.28699	0.568188	1.03709	0.54787	0.583781	0.998477
CACYBPP2	27.4881	0.346789	0.420128	0.825437	0.409123	0.998477
CADPS2	7.09701	2.73038	1.83013	1.49191	0.135723	0.898712
CALCOCO1	45.8745	-0.336815	0.467169	-0.720969	0.470929	0.998477
CALCOCO2	136.328	-0.174378	0.38768	-0.449798	0.652856	0.998477
CALD1	293.404	0.2972	0.345025	0.861386	0.389025	0.998477
CALHM2	12.645	-0.405304	0.68249	-0.593861	0.552605	0.998477
CALM1	131.63	-0.0336927	0.257179	-0.131009	0.895768	0.998477
CALM1P1	9.00658	-0.103944	0.674926	-0.154008	0.877603	0.998477
CALM2	245.113	-0.72367	0.210515	-3.43761	0.000586868	0.0545237
CALM2P2	27.4359	-0.331083	0.448157	-0.738766	0.460049	0.998477
CALM2P3	44.3098	-0.660778	0.330902	-1.9969	0.0458363	0.641169
CALM2P4	3.0745	-1.17325	1.33631	-0.877976	0.379957	0.998477
CALM3	12.5908	0.219495	0.624053	0.351725	0.725044	0.998477
CALR	19.7443	0.235917	0.766663	0.307719	0.758296	0.998477
CALU	444.525	-0.139708	0.252568	-0.553151	0.58016	0.998477
CAMK1	4.86325	-1.82991	1.41296	-1.29509	0.195289	0.96228
CAMK1D	3.35623	-1.99488	1.7621	-1.13211	0.257589	0.998477
CAMK1G	3.55978	5.23528	2.91205	1.7978	0.0722086	0.747009
CAMK2D	42.8789	-0.0311445	0.665287	-0.0468136	0.962662	0.998477
CAMK2G	12.4213	1.14173	1.5698	0.727309	0.467037	0.998477
CAMKK1	6.3186	0.716816	1.93309	0.370813	0.710777	0.998477
CAMKK2	3.19107	1.13261	1.54659	0.73233	0.463967	0.998477
CAMKMT	4.38528	-0.0490088	1.49039	-0.0328831	0.973768	0.998477
CAMLG	84.9123	1.29096	0.447675	2.88371	0.00393026	0.181592
CAMSAP2	3.74588	-0.0385081	1.31764	-0.0292251	0.976685	0.998477
CAMTA1	9.42781	-0.805392	0.826696	-0.97423	0.329942	0.998477
CAND1	26.5845	-0.9402	0.916717	-1.02562	0.305072	0.998477
CANT1	3.80717	0.588874	1.05995	0.55557	0.578505	0.998477
CANX	320.444	-0.159394	0.383103	-0.41606	0.677366	0.998477
CAP1	170.612	-0.249547	0.358706	-0.695686	0.486626	0.998477
CAP1P2	3.66948	-0.334429	1.13861	-0.293715	0.768975	0.998477
CAP2	10.6354	0.732395	1.02018	0.71791	0.472813	0.998477
CAPG	91.5643	-0.0744238	0.275131	-0.270503	0.786773	0.998477
CAPN1	85.3979	1.18747	0.365804	3.24619	0.00116963	0.0848189
CAPN2	476.947	0.00486893	0.268066	0.0181632	0.985509	0.998477
CAPN5	12.1901	0.179642	1.03165	0.17413	0.861763	0.998477
CAPN7	10.7331	3.658	1.0524	3.47586	0.00050922	0.04983
CAPNS1	43.9079	0.191121	0.561422	0.340423	0.733538	0.998477
CAPRIN1	45.1364	1.07391	0.653338	1.64373	0.100231	0.830288
CAPRIN2	7.71591	2.10012	1.98344	1.05883	0.289679	0.998477
CAPZA1	168.121	0.0827406	0.305125	0.27117	0.78626	0.998477
CAPZA2	85.4761	-0.100184	0.334928	-0.29912	0.764849	0.998477
CAPZB	119.077	0.000677434	0.221509	0.00305827	0.99756	0.999899
CARD16	3.32513	-0.566163	1.08393	-0.522323	0.601445	0.998477
CARD19	15.1437	-0.39151	0.896105	-0.436902	0.662183	0.998477
CARD8	4.05009	-2.65762	1.69808	-1.56507	0.117567	0.86801
CARF	4.58086	-1.41006	2.47111	-0.570618	0.568259	0.998477
CARHSP1	16.4822	-0.645741	0.671668	-0.9614	0.336351	0.998477
CARMIL1	4.59302	3.70481	2.24427	1.65079	0.0987819	0.825747
CARS	150.644	-0.447965	0.306759	-1.46032	0.144203	0.911429
CARS2	27.4764	0.934956	1.32028	0.708147	0.478854	0.998477
CASC3	5.5434	-0.11267	1.17954	-0.0955206	0.923901	0.998477
CASC4	12.4322	-0.139469	0.711202	-0.196103	0.84453	0.998477
CASC4P1	3.29896	0.467667	1.32189	0.353788	0.723498	0.998477
CASD1	3.7377	-0.0898534	1.34045	-0.0670321	0.946556	0.998477
CASP1	12.7764	-0.149667	0.637862	-0.234638	0.81449	0.998477
CASP3	16.7134	-0.0279407	0.623195	-0.0448345	0.964239	0.998477
CASP3P1	4.71951	-0.166178	0.940722	-0.176649	0.859784	0.998477
CASP4	146.909	-0.527076	0.246719	-2.13634	0.0326517	0.563052
CASP6	13.2978	-0.522986	0.746228	-0.700839	0.483404	0.998477
CASP7	23.2028	-0.16909	0.607694	-0.278248	0.780822	0.998477
CASP8	7.53553	-0.742266	1.68151	-0.441428	0.658903	0.998477
CASP9	12.8453	-0.194931	0.980513	-0.198806	0.842415	0.998477
CAST	249.452	0.0421477	0.287363	0.146671	0.883392	0.998477
CAT	184.81	0.355362	0.359167	0.989405	0.322465	0.998477
CAV1	160.72	-0.146981	0.408499	-0.359808	0.718991	0.998477
CAV2	26.2124	-0.319807	0.467195	-0.684526	0.493643	0.998477
CBFB	4.64148	0.719463	1.16374	0.618234	0.536421	0.998477
CBLB	14.3735	0.790214	1.12558	0.702051	0.482647	0.998477
CBLL1	8.48236	0.0136513	0.976798	0.0139756	0.988849	0.999556
CBR1	27.5039	0.725934	0.478349	1.51758	0.12912	0.890712
CBR3	3.24814	1.6801	1.57423	1.06725	0.285857	0.998477
CBR4	9.05771	-1.69897	0.869092	-1.95488	0.0505975	0.661153
CBS	96.4515	-0.293615	0.528063	-0.556022	0.578196	0.998477
CBSL	96.467	-0.294338	0.496577	-0.592735	0.553359	0.998477
CBWD1	75.658	-0.533471	0.312058	-1.70953	0.0873532	0.796277
CBWD2	98.9495	-0.36925	0.301853	-1.22328	0.221225	0.991059
CBWD3	66.2002	-0.422265	0.259048	-1.63007	0.103087	0.834471
CBWD4P	24.2611	-0.609802	0.429803	-1.4188	0.155959	0.930027
CBWD5	53.6729	-0.327828	0.291253	-1.12558	0.260343	0.998477
CBWD7	47.1419	-0.481969	0.326348	-1.47686	0.139714	0.90419
CBX1	19.9255	0.33139	0.527977	0.627661	0.530226	0.998477
CBX1P1	6.23621	0.071109	0.754911	0.0941952	0.924954	0.998477
CBX3	61.3667	-0.0858054	0.424212	-0.20227	0.839706	0.998477
CBX3P5	23.8184	-0.0877984	0.493723	-0.177829	0.858857	0.998477
CBX3P9	6.75039	-0.214073	0.776811	-0.275579	0.782871	0.998477
CBX5	11.044	-0.858855	0.840885	-1.02137	0.307079	0.998477
CBY1	17.2519	-0.351928	0.562385	-0.625778	0.53146	0.998477
CC2D1B	4.36776	-1.58512	1.08401	-1.46228	0.143665	0.911429
CC2D2A	22.7695	1.68972	1.04892	1.61092	0.107197	0.845339
CCAR1	18.3893	-1.01448	1.42184	-0.713495	0.475539	0.998477
CCAR2	6.84002	1.15039	1.21922	0.943548	0.345401	0.998477
CCDC107	4.34272	0.202723	0.922811	0.21968	0.82612	0.998477
CCDC112	5.68163	-2.01152	1.01745	-1.97702	0.0480394	0.654657
CCDC115	38.0437	-0.440395	0.387886	-1.13537	0.25622	0.998477
CCDC12	23.0201	-0.203882	0.544393	-0.374512	0.708023	0.998477
CCDC124	13.2753	-0.738118	0.706331	-1.045	0.296021	0.998477
CCDC126	3.47349	-0.643392	1.54397	-0.416714	0.676888	0.998477
CCDC127	11.8255	0.314966	0.629698	0.500186	0.616944	0.998477
CCDC137	3.84808	1.23149	1.49752	0.822354	0.410876	0.998477
CCDC138	5.76355	2.7109	1.67706	1.61646	0.105995	0.841539
CCDC14	6.60363	-0.12056	1.53134	-0.0787283	0.937249	0.998477
CCDC149	8.17056	1.06239	1.444	0.73573	0.461895	0.998477
CCDC159	8.78096	-0.697668	0.961674	-0.725472	0.468162	0.998477
CCDC174	20.3221	1.98736	0.891918	2.22818	0.0258682	0.507492
CCDC25	18.4659	-0.273812	0.756615	-0.361892	0.717433	0.998477
CCDC28A	25.6485	-0.47074	0.617328	-0.762544	0.445736	0.998477
CCDC28B	2.8641	0.0830675	1.99887	0.0415573	0.966852	0.998477
CCDC30	3.1304	5.05458	3.02633	1.6702	0.0948793	0.817252
CCDC34	10.4086	0.473323	0.915372	0.517083	0.605098	0.998477
CCDC40	4.07232	-5.62454	2.80757	-2.00335	0.04514	0.641169
CCDC43	3.79043	0.792171	1.25414	0.631643	0.52762	0.998477
CCDC47	47.1056	-0.962307	0.374985	-2.56625	0.0102804	0.304735
CCDC50	40.9543	-0.419259	0.415214	-1.00974	0.312619	0.998477
CCDC51	8.07671	0.193023	0.952537	0.202641	0.839416	0.998477
CCDC53	56.3811	-0.674072	0.450914	-1.4949	0.13494	0.898712
CCDC59	8.05521	0.2115	0.692456	0.305435	0.760035	0.998477
CCDC6	9.16497	-0.579507	0.997283	-0.581086	0.561183	0.998477
CCDC66	13.0222	0.750042	1.21375	0.617952	0.536607	0.998477
CCDC74A	10.8316	0.351772	0.628816	0.55942	0.575875	0.998477
CCDC74B	5.88805	0.229349	0.787434	0.291262	0.770851	0.998477
CCDC77	5.29978	0.608498	1.2871	0.472767	0.636379	0.998477
CCDC8	3.23043	-1.15156	1.1605	-0.992292	0.321055	0.998477
CCDC80	518.778	-0.0850547	0.161876	-0.525432	0.599283	0.998477
CCDC82	18.2076	0.651589	1.28056	0.508832	0.61087	0.998477
CCDC85B	4.49859	-0.369255	1.18347	-0.312012	0.755032	0.998477
CCDC86	4.17864	-0.425607	1.09933	-0.387153	0.698643	0.998477
CCDC88C	41.1936	0.398169	0.458877	0.867704	0.385556	0.998477
CCDC90B	57.9267	-0.656916	0.453197	-1.44951	0.147194	0.916392
CCDC91	7.19138	-0.380817	1.80598	-0.210865	0.832993	0.998477
CCDC92	8.19147	0.343042	0.73713	0.465374	0.641663	0.998477
CCDC94	5.00697	0.715141	2.46958	0.28958	0.772138	0.998477
CCDC97	5.46462	-0.149723	1.20527	-0.124224	0.901138	0.998477
CCL2	8.39706	-1.09392	0.79433	-1.37716	0.168463	0.938449
CCM2	16.5252	0.529844	1.13895	0.465205	0.641785	0.998477
CCNB1	6.72153	2.97428	1.20436	2.46959	0.0135268	0.346575
CCNB1IP1	14.6566	0.155664	0.639694	0.243341	0.807741	0.998477
CCNC	50.914	0.744831	0.340762	2.18578	0.0288315	0.539562
CCND1	3.35195	1.26917	1.1165	1.13674	0.255645	0.998477
CCND2	6.73713	0.726677	1.08045	0.672568	0.501222	0.998477
CCND3	7.50533	0.226117	0.905367	0.249752	0.802779	0.998477
CCNDBP1	46.546	-0.533724	0.345669	-1.54403	0.12258	0.878761
CCNG1	173.042	0.58512	0.231227	2.5305	0.01139	0.317178
CCNG2	14.7074	0.392082	1.26099	0.310931	0.755853	0.998477
CCNH	68.6912	-0.704884	0.277682	-2.53845	0.0111343	0.317178
CCNI	51.3011	0.864686	0.305913	2.82657	0.00470489	0.201122
CCNL1	5.66473	-1.68719	1.25911	-1.33999	0.18025	0.95611
CCNL2	9.39213	-1.22301	0.800581	-1.52765	0.126599	0.884889
CCNY	8.52321	-0.511565	1.07888	-0.474162	0.635384	0.998477
CCPG1	17.1736	-0.245632	0.516852	-0.475246	0.634612	0.998477
CCRL1P1	4.93666	0.673699	1.0055	0.670014	0.502849	0.998477
CCS	9.03493	-0.150042	0.691486	-0.216985	0.82822	0.998477
CCSER2	10.8054	-1.04435	0.693038	-1.50691	0.131834	0.896824
CCT2	221.414	0.0215787	0.222013	0.0971957	0.922571	0.998477
CCT3	493.195	-0.239856	0.170534	-1.4065	0.159575	0.934106
CCT4	225.004	0.325883	0.318736	1.02242	0.306581	0.998477
CCT5	11.5882	-0.120067	0.773537	-0.155218	0.87665	0.998477
CCT5P1	16.2238	-0.0783692	0.506764	-0.154646	0.8771	0.998477
CCT5P2	42.2626	-0.58217	0.310937	-1.87231	0.0611639	0.717855
CCT6A	47.1077	0.274284	0.284566	0.963869	0.335111	0.998477
CCT6P1	4.47211	0.301688	0.919454	0.328117	0.742823	0.998477
CCT6P2	29.5437	0.0597215	0.353758	0.16882	0.865938	0.998477
CCT6P3	4.62812	0.291955	0.884182	0.330198	0.74125	0.998477
CCT7	60.727	-0.101414	0.325167	-0.311883	0.75513	0.998477
CCT7P1	41.4469	-0.0236088	0.375705	-0.0628386	0.949895	0.998477
CCT7P2	8.23985	-0.561619	0.784835	-0.715589	0.474245	0.998477
CCZ1	99.8861	-0.356766	0.365701	-0.975568	0.329278	0.998477
CCZ1B	95.9714	-0.32851	0.380154	-0.864151	0.387505	0.998477
CD109	25.7644	0.239794	0.891792	0.26889	0.788014	0.998477
CD151	43.4032	0.545842	0.569034	0.959243	0.337436	0.998477
CD164	157.208	0.0719618	0.247385	0.29089	0.771136	0.998477
CD248	49.9696	0.344816	0.29492	1.16918	0.24233	0.998477
CD276	34.8256	-0.406642	0.538356	-0.755339	0.450045	0.998477
CD27-AS1	7.8742	0.27703	1.203	0.230283	0.817872	0.998477
CD2AP	4.77678	4.12966	1.761	2.34506	0.0190238	0.436473
CD2BP2	8.92481	0.414753	0.698033	0.594173	0.552396	0.998477
CD320	14.4821	-0.152786	0.524007	-0.291572	0.770614	0.998477
CD36	11.593	1.77732	1.34063	1.32574	0.184926	0.958624
CD40	11.2966	0.0498344	0.738861	0.0674476	0.946225	0.998477
CD44	417.112	0.915509	0.257501	3.55536	0.000377459	0.0474381
CD46	60.8554	0.458806	0.489937	0.936457	0.349038	0.998477
CD46P1	2.94205	-0.534448	1.23921	-0.431279	0.666265	0.998477
CD47	74.4503	-0.125287	0.373169	-0.335737	0.737069	0.998477
CD55	41.5414	0.571912	0.449418	1.27256	0.203173	0.977591
CD58	37.985	0.156195	0.659174	0.236956	0.812691	0.998477
CD59	166.61	0.426542	0.288208	1.47998	0.138878	0.903547
CD63	308.782	0.467104	0.27101	1.72356	0.0847865	0.783015
CD81	41.9323	0.416919	0.474993	0.877737	0.380086	0.998477
CD82	5.76526	2.31671	2.2177	1.04465	0.296186	0.998477
CD9	49.0151	0.791005	0.564376	1.40156	0.161048	0.934806
CD99	787.84	-0.137649	0.195775	-0.703101	0.481993	0.998477
CD99L2	69.4634	-0.25669	0.5412	-0.474298	0.635287	0.998477
CD99P1	6.88957	-0.0824085	1.497	-0.055049	0.956099	0.998477
CDADC1	6.53456	-0.58971	1.46823	-0.401646	0.687945	0.998477
CDC123	181.248	-0.379591	0.538609	-0.704762	0.480958	0.998477
CDC16	90.0448	-0.203546	0.510525	-0.3987	0.690114	0.998477
CDC23	29.5294	-0.767646	0.661357	-1.16071	0.245759	0.998477
CDC25B	6.12742	1.08621	1.3356	0.813277	0.416059	0.998477
CDC27	5.56977	-0.0434958	1.21066	-0.0359275	0.97134	0.998477
CDC37	45.621	1.07829	0.321577	3.35313	0.000799043	0.0683139
CDC37L1	30.4245	0.589398	0.481672	1.22365	0.221084	0.991059
CDC40	18.8257	0.358182	0.974307	0.367627	0.713151	0.998477
CDC42	38.5414	0.0513132	0.376822	0.136174	0.891684	0.998477
CDC42EP1	7.40605	-0.191084	0.737925	-0.258948	0.795675	0.998477
CDC42EP2	8.37042	1.05048	0.894891	1.17387	0.240449	0.998477
CDC42EP3	5.56598	-0.0160767	1.07903	-0.0148992	0.988113	0.999185
CDC42P6	46.8018	-0.200658	0.353024	-0.568398	0.569765	0.998477
CDC42SE1	3.29173	-0.00860078	1.29111	-0.00666156	0.994685	0.99977
CDC42SE2	7.5399	-0.359937	0.932173	-0.386127	0.699403	0.998477
CDC5L	44.2538	-0.591544	0.510191	-1.15946	0.246271	0.998477
CDC73	13.5609	-1.22732	1.17174	-1.04743	0.2949	0.998477
CDCA7L	8.72829	-0.699201	1.51665	-0.461018	0.644785	0.998477
CDH11	236.407	-0.830149	0.335942	-2.47111	0.0134695	0.346575
CDH13	182.311	0.230883	0.376705	0.612901	0.539941	0.998477
CDH2	132.663	-0.338179	0.298178	-1.13415	0.256731	0.998477
CDIPT	17.3449	0.52231	0.524258	0.996283	0.319113	0.998477
CDK10	16.5302	-0.305066	0.994349	-0.3068	0.758995	0.998477
CDK11B	2.90966	0.152123	1.65455	0.0919423	0.926744	0.998477
CDK13	4.0145	2.02152	2.57016	0.786535	0.431554	0.998477
CDK14	5.60162	-2.09237	1.36916	-1.52821	0.126459	0.884889
CDK16	15.6277	-0.643518	0.644564	-0.998377	0.318096	0.998477
CDK17	6.0163	-4.66138	1.61497	-2.88635	0.00389739	0.181592
CDK20	4.83784	-1.24531	1.28248	-0.971018	0.33154	0.998477
CDK2AP1	6.23362	0.853086	1.09766	0.777184	0.43705	0.998477
CDK2AP2	7.49606	-0.130432	0.794444	-0.16418	0.869589	0.998477
CDK4	38.0454	-0.310318	0.331803	-0.935247	0.349661	0.998477
CDK5	8.08574	0.53426	0.852002	0.627064	0.530617	0.998477
CDK5RAP1	30.8188	-1.15123	0.828156	-1.39011	0.164495	0.936217
CDK5RAP2	18.0702	0.372788	1.2302	0.303031	0.761867	0.998477
CDK5RAP3	3.17591	-0.435018	1.17847	-0.369136	0.712026	0.998477
CDK7	6.35966	0.667901	0.759962	0.878861	0.379477	0.998477
CDK7P1	8.34637	0.492774	0.709097	0.694931	0.487098	0.998477
CDK9	11.5868	0.261272	0.768111	0.340148	0.733745	0.998477
CDKAL1	12.2649	0.398347	1.06461	0.37417	0.708278	0.998477
CDKN1A	416.066	0.504608	0.21962	2.29764	0.0215822	0.467443
CDKN2A	5.28331	-1.16988	1.13202	-1.03344	0.301396	0.998477
CDKN2AIPNL	6.92401	-0.547621	0.929541	-0.58913	0.555774	0.998477
CDKN2C	3.33881	1.36846	1.53229	0.893077	0.371816	0.998477
CDPF1	6.52875	-0.00906904	1.05428	-0.00860214	0.993137	0.999601
CDR2	2.90452	0.358027	1.38557	0.258397	0.796101	0.998477
CDS2	40.3699	-0.501128	0.451308	-1.11039	0.266831	0.998477
CDV3	5.27319	0.0913471	1.00666	0.0907425	0.927697	0.998477
CDYL	6.36121	-1.5341	1.02472	-1.49709	0.13437	0.898712
CEBPG	8.33592	0.254178	0.857137	0.296543	0.766815	0.998477
CEBPZ	30.0542	-0.591084	0.540712	-1.09316	0.274324	0.998477
CEBPZOS	9.03375	1.14974	0.799426	1.4382	0.150377	0.920533
CECR5	12.8268	0.0820678	1.10981	0.0739475	0.941052	0.998477
CELF1	9.54123	0.158511	1.19341	0.132822	0.894334	0.998477
CENPBD1P1	5.47808	0.598454	1.02628	0.583128	0.559807	0.998477
CENPH	3.03726	-0.627832	2.41017	-0.260492	0.794484	0.998477
CENPN	4.08065	-2.62637	1.78012	-1.47538	0.140109	0.905068
CENPP	3.01852	0.472196	1.37261	0.344015	0.730835	0.998477
CENPQ	4.18108	0.399146	1.88379	0.211884	0.832197	0.998477
CENPT	7.37297	1.34221	1.00003	1.34217	0.179541	0.955709
CEP112	14.4396	-2.41235	1.05476	-2.28711	0.0221892	0.47034
CEP120	4.1858	1.91776	2.37905	0.806103	0.420183	0.998477
CEP162	8.56953	3.39393	2.22662	1.52425	0.127446	0.886988
CEP170	2.83182	-1.18554	1.2715	-0.932392	0.351134	0.998477
CEP192	3.23976	0.148201	2.40889	0.0615226	0.950943	0.998477
CEP250	5.17894	0.0612487	1.53176	0.0399859	0.968104	0.998477
CEP290	10.8301	0.0531882	1.66316	0.0319801	0.974488	0.998477
CEP41	13.6717	-0.195994	1.27868	-0.153279	0.878179	0.998477
CEP44	8.66803	-3.62323	1.56556	-2.31434	0.0206493	0.45837
CEP57	13.5183	0.628783	0.621668	1.01145	0.311803	0.998477
CEP63	32.4922	0.977095	0.918153	1.0642	0.28724	0.998477
CEP68	9.15105	0.358023	1.15341	0.310404	0.756254	0.998477
CEP70	3.33867	1.82956	2.00925	0.910569	0.362523	0.998477
CEP72	3.36932	0.396722	1.94601	0.203864	0.83846	0.998477
CEP78	4.83109	-1.93055	1.83169	-1.05397	0.291896	0.998477
CEP83	5.3306	2.40502	1.70602	1.40972	0.158622	0.934106
CEP89	10.785	-0.547464	1.23355	-0.443811	0.657179	0.998477
CEP95	16.6713	-1.26392	0.953712	-1.32526	0.185084	0.958624
CEPT1	13.3255	1.6837	1.00731	1.67148	0.0946263	0.817252
CERCAM	244.756	0.392302	0.276983	1.41634	0.156676	0.931153
CERK	6.67698	-1.80121	1.5735	-1.14472	0.252325	0.998477
CERS2	3.38893	0.245327	1.18561	0.206921	0.836072	0.998477
CERS5	56.6276	-0.161216	0.418516	-0.385208	0.700083	0.998477
CES2	12.5436	1.21853	0.649862	1.87507	0.0607835	0.717855
CETN2	25.7838	0.455252	0.385812	1.17998	0.238007	0.998477
CETN3	35.0028	-1.11551	0.388792	-2.86916	0.0041156	0.185705
CFAP20	28.2793	-0.371296	0.436511	-0.850598	0.394993	0.998477
CFAP36	58.7527	0.150439	0.368472	0.408277	0.68307	0.998477
CFAP97	6.62246	-0.280198	1.11896	-0.250408	0.802272	0.998477
CFDP1	84.8558	0.0117434	0.294514	0.0398737	0.968194	0.998477
CFH	67.1061	0.0553855	0.493203	0.112297	0.910588	0.998477
CFHR1	5.65156	0.458793	1.01004	0.454235	0.64966	0.998477
CFL1	19.8073	0.757133	0.441335	1.71555	0.0862445	0.792021
CFL2	24.0033	0.627887	0.40173	1.56296	0.118062	0.86801
CFLAR	4.83721	0.564477	1.78703	0.315874	0.752098	0.998477
CGGBP1	9.27098	0.561687	0.953607	0.589013	0.555853	0.998477
CGRRF1	28.3432	-0.145653	0.651414	-0.223596	0.823072	0.998477
CH17-13I23.3	3.79232	-0.377066	1.29925	-0.290219	0.771649	0.998477
CH17-189H20.1	6.59593	-0.00307135	0.823865	-0.00372797	0.997026	0.999899
CH17-248H7.2	5.85333	-0.178098	0.798696	-0.222986	0.823547	0.998477
CH17-258A22.4	5.14703	-0.0728607	0.9362	-0.077826	0.937966	0.998477
CH17-260O16.1	3.64241	0.380448	0.955154	0.398311	0.690401	0.998477
CH17-264B6.4	3.28367	-0.271219	1.09122	-0.248547	0.803711	0.998477
CH17-333M13.2	5.94625	-0.128552	0.796448	-0.161407	0.871773	0.998477
CH17-385C13.2	26.1322	0.234335	0.40285	0.581694	0.560773	0.998477
CH17-431G21.1	8.60771	0.359355	0.801746	0.448215	0.653998	0.998477
CH17-472G23.1	4.99682	0.192838	0.989824	0.19482	0.845534	0.998477
CH17-472G23.2	4.80747	0.50056	1.02883	0.486533	0.626589	0.998477
CH17-472G23.4	18.1977	-0.331904	0.722811	-0.459185	0.646101	0.998477
CH17-478G19.2	36.4959	0.147101	0.372926	0.394451	0.693248	0.998477
CH25H	6.16215	0.478372	0.913033	0.523938	0.600322	0.998477
CH507-42P11.1	7.51276	0.00416489	0.707258	0.00588879	0.995301	0.999799
CH507-513H4.3	53.6333	0.87182	0.40348	2.16075	0.0307147	0.551913
CH507-513H4.4	58.1422	0.944015	0.422642	2.2336	0.0255092	0.507355
CH507-513H4.5	25.8213	0.955574	0.532055	1.79601	0.0724934	0.747009
CH507-513H4.6	58.1049	0.676506	0.479401	1.41115	0.158201	0.934106
CH507-9B2.3	19.381	0.287265	0.539035	0.532926	0.594085	0.998477
CH507-9B2.5	9.06803	0.712563	0.976486	0.729722	0.46556	0.998477
CHAC1	9.32133	0.127004	0.788249	0.161122	0.871997	0.998477
CHCHD2P2	49.6021	0.227865	0.309851	0.735402	0.462095	0.998477
CHCHD2P6	47.4347	0.17887	0.314252	0.569192	0.569226	0.998477
CHCHD2P9	24.7797	0.401033	0.418042	0.959313	0.337401	0.998477
CHCHD3	8.09652	0.322105	0.850234	0.378843	0.704805	0.998477
CHCHD3P3	17.5758	0.205482	0.517072	0.397396	0.691076	0.998477
CHCHD4	6.51401	-0.187472	0.855072	-0.219248	0.826457	0.998477
CHCHD6	29.0288	1.00267	0.711507	1.40923	0.158768	0.934106
CHCHD7	13.671	0.41937	0.62809	0.66769	0.504331	0.998477
CHD1	3.36789	-5.35486	2.63045	-2.03572	0.0417784	0.621702
CHD1L	94.15	-0.0274781	0.345659	-0.0794947	0.936639	0.998477
CHD4	10.5042	0.530431	0.783906	0.676651	0.498628	0.998477
CHEK1	5.20602	-0.564201	2.33889	-0.241226	0.80938	0.998477
CHEK2	21.7553	1.61587	0.550503	2.93525	0.00333278	0.165054
CHFR	14.5847	3.25196	1.4962	2.17348	0.0297442	0.548325
CHI3L1	13.4098	-1.0277	0.941515	-1.09154	0.275037	0.998477
CHIC2	22.05	-0.792509	0.557935	-1.42043	0.155482	0.92874
CHID1	306.528	-0.0101638	0.18333	-0.0554399	0.955788	0.998477
CHMP1A	48.4196	0.156973	0.382576	0.410305	0.681582	0.998477
CHMP2A	75.151	0.054276	0.313178	0.173307	0.86241	0.998477
CHMP2B	27.032	-0.393285	0.431603	-0.911221	0.362179	0.998477
CHMP5	56.4891	-0.0539174	0.380233	-0.141801	0.887237	0.998477
CHMP6	14.7601	-0.0445652	0.937157	-0.0475536	0.962072	0.998477
CHMP7	14.7832	0.292941	0.533249	0.549351	0.582765	0.998477
CHN1	75.1716	-0.236467	0.304233	-0.777257	0.437007	0.998477
CHORDC1	2.84321	0.108774	1.10501	0.0984378	0.921585	0.998477
CHP1	51.6264	1.38235	0.5858	2.35976	0.0182867	0.424357
CHPF	7.59781	-0.0664115	0.713634	-0.093061	0.925855	0.998477
CHRAC1	10.2681	-0.019995	0.700226	-0.0285551	0.977219	0.998477
CHTOP	23.401	1.0278	0.821349	1.25136	0.210803	0.98627
CHUK	17.6951	1.38989	1.25182	1.1103	0.266869	0.998477
CIAO1	14.4834	-0.543934	0.659403	-0.824888	0.409435	0.998477
CIAPIN1	4.23991	-0.240899	1.08567	-0.22189	0.8244	0.998477
CIAPIN1P	6.27612	-0.158283	0.894593	-0.176932	0.859562	0.998477
CIART	6.14392	0.0245112	1.30164	0.018831	0.984976	0.998477
CIB1	34.1022	-0.293612	0.375149	-0.782654	0.43383	0.998477
CIDECP	10.6696	-0.0750569	0.675173	-0.111167	0.911484	0.998477
CILP	5.03315	-1.80927	1.33628	-1.35396	0.17575	0.955545
CINP	51.3719	-0.470163	0.300841	-1.56283	0.118093	0.86801
CIR1	9.2471	-0.656549	0.707758	-0.927646	0.353591	0.998477
CIR1P1	5.04513	-0.326201	0.838457	-0.38905	0.697239	0.998477
CIR1P2	2.85101	-1.18435	1.12612	-1.05171	0.292934	0.998477
CIRBP	34.8805	0.309855	0.428351	0.723366	0.469455	0.998477
CISD1	8.98484	0.810658	0.840599	0.964381	0.334855	0.998477
CISD2	19.6497	0.0569398	0.538733	0.105692	0.915827	0.998477
CIZ1	68.8267	0.00611954	0.487853	0.0125438	0.989992	0.999601
CKAP2	8.52354	-0.167617	1.14146	-0.146845	0.883255	0.998477
CKAP4	10.1509	0.117042	0.616415	0.189876	0.849407	0.998477
CKAP5	15.0832	0.492951	0.863877	0.570626	0.568253	0.998477
CKS1B	5.2489	0.6442	1.03984	0.61952	0.535574	0.998477
CKS1BP2	4.47446	0.0240985	0.899959	0.0267773	0.978637	0.998477
CKS1BP3	4.81633	0.128211	0.890389	0.143994	0.885505	0.998477
CLASP1	3.16801	5.12359	2.22069	2.3072	0.0210435	0.460763
CLASP2	3.60841	-2.35412	1.76562	-1.33331	0.182429	0.958624
CLCC1	35.7777	0.428958	0.583084	0.735671	0.461931	0.998477
CLCN3	18.602	-0.834691	0.885108	-0.943039	0.345661	0.998477
CLCN6	3.97156	0.200477	1.66175	0.120642	0.903975	0.998477
CLDN11	41.9656	1.45	0.548498	2.64359	0.00820319	0.275315
CLDND1	14.4422	-0.353801	0.646982	-0.546848	0.584483	0.998477
CLEC11A	2.88215	-1.1912	1.20085	-0.991966	0.321214	0.998477
CLEC16A	5.04587	-3.25933	1.76817	-1.84333	0.0652808	0.731743
CLEC2B	15.9756	-1.23235	0.658239	-1.8722	0.0611794	0.717855
CLIC1	42.2902	0.163579	0.316082	0.517521	0.604793	0.998477
CLIC1P1	22.8537	0.156189	0.425775	0.366835	0.713742	0.998477
CLIC2	5.85132	1.71251	0.992588	1.7253	0.0844741	0.783015
CLIC4	92.2417	-0.215443	0.381964	-0.564039	0.572727	0.998477
CLIC4P1	5.95213	-0.978996	0.857603	-1.14155	0.253642	0.998477
CLIC4P2	10.8261	-0.109913	0.714352	-0.153864	0.877717	0.998477
CLIC4P3	8.52804	0.313718	0.751205	0.41762	0.676225	0.998477
CLINT1	46.4655	0.20404	0.465791	0.438051	0.661349	0.998477
CLIP1	7.92294	-0.108129	1.74536	-0.0619524	0.950601	0.998477
CLIP2	6.34305	0.302502	1.66618	0.181554	0.855933	0.998477
CLIP3	19.8479	1.18354	0.591474	2.00101	0.0453914	0.641169
CLIP4	21.6859	-0.0866785	0.542185	-0.159869	0.872984	0.998477
CLK1	9.94287	-0.205699	1.05984	-0.194086	0.846108	0.998477
CLK3	45.9373	-0.65598	0.558079	-1.17542	0.239825	0.998477
CLK4	9.00713	-1.39666	1.28297	-1.08862	0.276321	0.998477
CLMP	17.2234	0.131798	0.778519	0.169293	0.865566	0.998477
CLN8	2.85618	0.256347	1.48184	0.172992	0.862658	0.998477
CLNS1A	54.1225	0.308756	0.364208	0.847747	0.396579	0.998477
CLNS1AP1	20.7708	0.0270596	0.506959	0.0533763	0.957432	0.998477
CLOCK	4.86619	4.02236	1.54417	2.60486	0.00919116	0.286018
CLP1	8.65496	0.280926	0.720763	0.389762	0.696712	0.998477
CLPB	11.4088	0.523237	1.2195	0.429058	0.667881	0.998477
CLPP	61.9765	-0.491568	0.538954	-0.912078	0.361728	0.998477
CLPTM1	12.3842	0.551144	1.22356	0.450444	0.65239	0.998477
CLPTM1L	13.1765	-0.883961	1.40751	-0.628031	0.529984	0.998477
CLPX	37.8044	0.319527	0.908856	0.351571	0.72516	0.998477
CLTA	92.8099	-0.364084	0.431923	-0.842936	0.399264	0.998477
CLTB	16.3148	0.0289485	0.685311	0.0422414	0.966306	0.998477
CLTC	35.4639	-0.462912	0.478069	-0.968295	0.332897	0.998477
CLU	3773.21	-0.619355	0.0998562	-6.20247	5.55839e-10	5.01614e-07
CLUAP1	46.238	-0.507665	0.375561	-1.35175	0.176455	0.955557
CLYBL	10.6921	-0.942532	1.09787	-0.858506	0.390613	0.998477
CMAHP	4.3077	-1.75518	1.47956	-1.18629	0.23551	0.998477
CMAS	33.5592	1.05316	0.683902	1.53993	0.123577	0.878761
CMB9-22P13.1	2.85998	0.0249734	1.09852	0.0227337	0.981863	0.998477
CMBL	64.1493	0.151314	0.445733	0.339472	0.734254	0.998477
CMC2	17.7286	-0.86042	0.748356	-1.14975	0.250248	0.998477
CMPK1	38.7182	0.665529	0.358911	1.8543	0.0636965	0.726605
CMSS1	87.034	-0.608283	0.306046	-1.98756	0.0468609	0.646121
CMTM3	23.6117	0.308916	0.706268	0.437393	0.661827	0.998477
CMTM6	10.1012	0.610274	0.734957	0.830354	0.406339	0.998477
CMTM7	9.57551	0.344704	0.783212	0.440117	0.659853	0.998477
CMTR1	12.138	0.712143	1.2527	0.568485	0.569705	0.998477
CNBP	155.433	-0.0313633	0.240802	-0.130245	0.896373	0.998477
CNDP2	81.2352	-0.0358364	0.431006	-0.0831459	0.933736	0.998477
CNEP1R1	25.666	-0.312179	0.745262	-0.418885	0.675301	0.998477
CNIH1	204.998	0.058365	0.218263	0.267406	0.789156	0.998477
CNIH3	13.4577	-0.512955	0.675706	-0.759139	0.44777	0.998477
CNIH4	22.9914	0.810381	0.843864	0.960322	0.336893	0.998477
CNN2	100.566	0.0928837	0.273474	0.339644	0.734125	0.998477
CNN2P10	4.71473	1.13747	0.913255	1.24551	0.212943	0.98627
CNN2P12	11.887	0.0975979	0.605752	0.161119	0.872	0.998477
CNN2P9	9.50244	0.858874	0.665083	1.29138	0.196572	0.963022
CNN3	296.645	-0.477239	0.265134	-1.79999	0.0718618	0.747009
CNN3P1	4.26487	0.411295	0.958777	0.428978	0.667939	0.998477
CNOT1	7.99896	0.922584	1.75342	0.526162	0.598776	0.998477
CNOT10	17.8579	1.01083	1.06981	0.944877	0.344722	0.998477
CNOT11	12.5358	-0.249525	0.838159	-0.297706	0.765927	0.998477
CNOT2	104.98	-0.113408	0.385048	-0.29453	0.768353	0.998477
CNOT4	12.8403	-0.591293	0.973882	-0.607151	0.543751	0.998477
CNOT7	14.7374	0.421532	0.98785	0.426717	0.669586	0.998477
CNOT7P1	4.56046	-0.174411	1.11536	-0.156371	0.87574	0.998477
CNOT8	20.9085	-0.157201	0.607416	-0.258803	0.795787	0.998477
CNOT9	27.8283	-0.818839	0.556847	-1.47049	0.141429	0.905902
CNP	19.8122	0.805301	0.692032	1.16368	0.244556	0.998477
CNPPD1	13.6265	-0.548992	0.537247	-1.02186	0.306846	0.998477
CNPY3	39.7552	-0.323386	0.409877	-0.788983	0.430122	0.998477
CNPY4	14.4013	0.0713203	0.818308	0.0871558	0.930548	0.998477
CNRIP1	23.0853	0.102655	0.490621	0.209236	0.834264	0.998477
CNST	11.9326	-0.736529	0.778233	-0.946411	0.343939	0.998477
CNTROB	3.53997	-2.20799	1.96189	-1.12544	0.260402	0.998477
COA1	28.3823	0.00760948	0.436899	0.017417	0.986104	0.998477
COA3	6.13726	-0.242295	0.780723	-0.310347	0.756297	0.998477
COA4	9.80707	0.508593	0.812582	0.625898	0.531382	0.998477
COA5	6.38198	0.154489	0.748932	0.206279	0.836573	0.998477
COA7	15.5899	0.244678	0.603191	0.405638	0.685008	0.998477
COASY	7.76957	-0.371327	0.872125	-0.425773	0.670273	0.998477
COBLL1	3.11658	-1.45661	1.87661	-0.776192	0.437636	0.998477
COG1	4.1826	1.34348	1.35191	0.993764	0.320338	0.998477
COG2	49.5408	0.179056	0.428917	0.41746	0.676342	0.998477
COG3	7.97411	-0.364389	1.88943	-0.192857	0.847071	0.998477
COG4	97.3852	0.456236	0.300291	1.51931	0.128684	0.890712
COG5	65.5279	-1.08153	0.46569	-2.32242	0.0202106	0.453454
COG6	40.2388	-0.226967	0.799742	-0.2838	0.776564	0.998477
COG7	26.2554	-0.291721	1.11277	-0.262157	0.793201	0.998477
COIL	11.1001	0.337142	0.904353	0.372799	0.709298	0.998477
COL11A1	17.4416	-0.442861	1.15363	-0.383883	0.701065	0.998477
COL12A1	21.0824	-1.04517	0.808455	-1.2928	0.196082	0.96228
COL14A1	30.5125	-1.82066	1.16714	-1.55994	0.118774	0.86987
COL15A1	130.291	-0.561192	0.577087	-0.972457	0.330823	0.998477
COL16A1	2.91644	1.07748	1.95495	0.551154	0.581528	0.998477
COL1A1	691.001	-0.955616	0.280497	-3.40686	0.00065714	0.0593032
COL1A2	6240.34	-0.827443	0.277896	-2.97753	0.0029058	0.151288
COL21A1	5.00365	-5.92781	2.46017	-2.40952	0.0159737	0.384038
COL3A1	2245.28	-1.63383	0.299139	-5.46178	4.71381e-08	2.39285e-05
COL4A3BP	7.64914	1.25445	1.36005	0.922357	0.356343	0.998477
COL5A1	45.491	-0.389384	0.577087	-0.674741	0.499841	0.998477
COL5A2	155.544	-0.313023	0.385511	-0.811971	0.416809	0.998477
COL6A1	199.825	-0.254057	0.336563	-0.754858	0.450334	0.998477
COL6A2	95.7346	0.164998	0.352215	0.46846	0.639456	0.998477
COL6A3	607.688	-0.888422	0.251742	-3.5291	0.000416982	0.0482348
COL8A1	79.0764	-0.820404	0.303338	-2.70459	0.00683896	0.249085
COLEC12	3.16952	0.104491	1.61482	0.0647074	0.948407	0.998477
COLGALT1	19.676	-0.586343	0.730373	-0.802801	0.42209	0.998477
COMMD1	5.38346	-0.828402	1.16019	-0.714024	0.475212	0.998477
COMMD10	13.0778	-0.608602	0.915788	-0.664567	0.506328	0.998477
COMMD2	21.6432	-0.529291	1.00621	-0.526024	0.598872	0.998477
COMMD3	13.4029	0.0279831	0.57291	0.0488438	0.961044	0.998477
COMMD4	13.6119	0.102945	0.648859	0.158656	0.87394	0.998477
COMMD5	15.6354	-0.153796	0.55911	-0.275073	0.78326	0.998477
COMMD6	6.02415	-0.739382	1.28074	-0.577307	0.563732	0.998477
COMMD7	37.144	0.0889845	0.461529	0.192803	0.847113	0.998477
COMMD8	36.2469	-0.365397	0.392462	-0.931037	0.351835	0.998477
COMMD9	54.2257	0.0640018	0.456317	0.140257	0.888457	0.998477
COMP	22.7412	-0.228158	0.575406	-0.396517	0.691723	0.998477
COMT	159.51	0.0363635	0.237357	0.153201	0.87824	0.998477
COPA	108.331	-0.0262055	0.332074	-0.0789146	0.937101	0.998477
COPB1	229.231	-0.157857	0.390608	-0.404132	0.686115	0.998477
COPB2	292.666	-0.0210095	0.302006	-0.0695664	0.944539	0.998477
COPE	188.784	-0.0520273	0.359513	-0.144716	0.884935	0.998477
COPG1	190.712	0.0139305	0.280218	0.0497129	0.960351	0.998477
COPG2	21.4334	0.0262122	0.975731	0.0268642	0.978568	0.998477
COPRS	13.387	0.949253	0.561998	1.68907	0.091206	0.811364
COPS2	124.546	0.627563	0.287635	2.18181	0.0291237	0.54253
COPS3	149.315	-0.0871522	0.245483	-0.355023	0.722572	0.998477
COPS4	128.815	-0.355034	0.338935	-1.0475	0.29487	0.998477
COPS5	88.1025	-0.371589	0.35474	-1.0475	0.294871	0.998477
COPS5P1	9.33135	-0.0356096	0.653424	-0.0544969	0.956539	0.998477
COPS6	47.3956	-0.41527	0.320854	-1.29426	0.195575	0.96228
COPS7A	62.1218	-0.194581	0.272381	-0.714371	0.474998	0.998477
COPS7B	19.1842	0.263058	0.571391	0.460382	0.645242	0.998477
COPS8	42.1185	-0.204935	0.347386	-0.589935	0.555235	0.998477
COPS8P2	39.3612	-0.252721	0.367177	-0.688281	0.491276	0.998477
COPZ1	195.404	0.0314442	0.225934	0.139174	0.889313	0.998477
COPZ2	111.774	-0.216601	0.383846	-0.564291	0.572556	0.998477
COQ10B	50.8337	-1.0746	0.570883	-1.88234	0.0597894	0.717855
COQ2	3.28801	-1.16288	1.35708	-0.8569	0.3915	0.998477
COQ3	10.0635	0.00738716	0.820148	0.0090071	0.992813	0.999601
COQ4	37.2454	0.572982	0.545854	1.0497	0.293857	0.998477
COQ5	33.9195	0.530907	0.579667	0.915883	0.359728	0.998477
COQ6	6.45926	0.981631	0.879575	1.11603	0.26441	0.998477
COQ7	6.54618	-0.712141	0.950572	-0.749171	0.453754	0.998477
COQ8A	9.50134	0.584438	1.40795	0.415099	0.67807	0.998477
COQ8B	9.705	2.10796	1.31343	1.60493	0.10851	0.848661
COQ9	35.3147	-0.0573374	0.474861	-0.120746	0.903893	0.998477
CORO1C	65.9598	1.30404	0.447393	2.91477	0.00355955	0.174161
CORO2B	6.26551	0.120342	1.14403	0.105191	0.916224	0.998477
COTL1	12.5663	2.21502	0.905913	2.44506	0.0144826	0.357532
COX10	4.39323	-0.388755	1.52148	-0.255511	0.798329	0.998477
COX11	6.30954	-0.558853	1.01691	-0.54956	0.582621	0.998477
COX11P1	2.77021	-0.958583	1.60372	-0.597723	0.550025	0.998477
COX15	20.2626	1.41281	0.57766	2.44575	0.014455	0.357532
COX18	5.99911	-0.323874	1.4402	-0.224881	0.822072	0.998477
COX20P1	3.74044	-0.079797	0.962422	-0.0829127	0.933921	0.998477
COX4I1	68.7482	-0.300972	0.463958	-0.648705	0.516529	0.998477
COX4I1P1	16.1199	-0.062907	0.639431	-0.0983798	0.921631	0.998477
COX5A	7.34932	-0.141807	0.891071	-0.159142	0.873557	0.998477
COX5B	2.81472	0.881206	1.55324	0.567333	0.570488	0.998477
COX6B1	6.82299	1.28016	1.64241	0.77944	0.435721	0.998477
COX6C	4.05145	0.15982	1.55893	0.102519	0.918345	0.998477
COX7A2L	163.117	0.0635363	0.237285	0.267764	0.788881	0.998477
CPD	4.19457	1.46373	1.79095	0.817292	0.413762	0.998477
CPE	131.595	-0.643181	0.331243	-1.94172	0.052171	0.673661
CPEB1	2.90192	-0.654946	1.17497	-0.557417	0.577243	0.998477
CPED1	11.2987	3.19513	0.96643	3.30612	0.000945972	0.0760711
CPNE1	9.30405	-1.37119	0.839844	-1.63267	0.102539	0.833321
CPNE2	2.81075	2.0452	2.51641	0.812742	0.416366	0.998477
CPNE3	20.9136	-0.465809	0.986749	-0.472064	0.636881	0.998477
CPNE8	4.16774	-2.25533	2.28933	-0.985151	0.32455	0.998477
CPOX	3.75772	5.325	1.66074	3.20641	0.00134402	0.0917321
CPPED1	18.136	0.478213	0.615124	0.777425	0.436908	0.998477
CPQ	145.22	-0.0321091	0.264508	-0.121392	0.903381	0.998477
CPSF2	31.1891	-0.607162	0.867038	-0.700272	0.483758	0.998477
CPSF3	105.105	0.563681	0.286712	1.96602	0.0492962	0.661153
CPSF3L	28.1791	-0.380462	0.780446	-0.487493	0.625909	0.998477
CPSF4	31.0497	-0.150839	0.550862	-0.273823	0.784221	0.998477
CPSF6	39.2259	-0.540419	0.402704	-1.34198	0.179604	0.955709
CPSF7	9.47776	-1.46958	1.6203	-0.906982	0.364416	0.998477
CPT1A	27.0123	1.49425	0.798262	1.87188	0.061223	0.717855
CPT2	2.93491	0.0473625	1.71962	0.0275424	0.978027	0.998477
CRABP2	80.8554	0.288747	0.29846	0.967454	0.333317	0.998477
CRADD	14.5823	0.3769	0.752999	0.500532	0.616701	0.998477
CRAT	38.3149	-0.49361	0.626254	-0.788194	0.430583	0.998477
CRBN	44.4533	-0.0650164	0.492056	-0.132132	0.89488	0.998477
CREB1	13.3731	0.133798	1.06585	0.125533	0.900102	0.998477
CREB3	16.3544	0.450775	0.566182	0.796166	0.425936	0.998477
CREB3L1	53.5647	-0.520376	0.418399	-1.24373	0.213599	0.98627
CREB3L2	9.36993	-0.542757	1.09372	-0.496247	0.61972	0.998477
CREBL2	6.95987	-0.865212	1.40714	-0.614872	0.538639	0.998477
CREG1	62.3507	-0.204546	0.363236	-0.563123	0.573351	0.998477
CRELD1	6.32679	0.671397	1.38033	0.486403	0.626681	0.998477
CRELD2	34.3772	-0.551465	0.598824	-0.920913	0.357096	0.998477
CREM	9.34245	0.0855293	0.81861	0.104481	0.916788	0.998477
CRIM1	3.75241	3.33125	1.55325	2.14469	0.0319775	0.556148
CRIP2	6.94921	1.09565	1.04775	1.04572	0.295689	0.998477
CRIPT	13.7211	-0.328386	0.630509	-0.520827	0.602487	0.998477
CRISPLD2	3.78453	-2.32136	2.19621	-1.05699	0.290517	0.998477
CRK	10.9106	-0.767367	0.758422	-1.01179	0.311636	0.998477
CRLF3	5.9822	1.81491	1.63815	1.1079	0.267905	0.998477
CRLS1	8.40712	-0.117504	1.09428	-0.10738	0.914487	0.998477
CRMP1	3.2662	-1.87885	1.35535	-1.38625	0.165671	0.936217
CRNDE	3.93625	0.109506	1.29033	0.0848666	0.932367	0.998477
CRNKL1	24.6748	0.125815	0.622081	0.202248	0.839723	0.998477
CROT	14.3151	-0.35926	0.982069	-0.365819	0.7145	0.998477
CRTAP	167.717	-0.513295	0.371362	-1.3822	0.166912	0.936217
CRTC2	8.76565	0.861917	0.789069	1.09232	0.274692	0.998477
CRTC3	4.30676	0.918162	1.46608	0.626271	0.531138	0.998477
CRY1	4.73694	-1.2248	1.85912	-0.658809	0.510018	0.998477
CRY2	4.52176	-0.47987	1.41789	-0.338439	0.735032	0.998477
CRYAB	9.6699	2.05745	1.00395	2.04936	0.0404269	0.618299
CRYBB2	5.99668	-0.861123	0.943863	-0.912338	0.361591	0.998477
CRYBB2P1	16.7367	-0.820272	0.863896	-0.949503	0.342365	0.998477
CRYL1	31.9999	-1.71854	1.23614	-1.39025	0.164453	0.936217
CRYZ	35.1419	0.849643	0.81603	1.04119	0.297787	0.998477
CRYZL1	55.207	-0.282359	0.420856	-0.670917	0.502274	0.998477
CS	5.87433	0.267913	1.06429	0.251729	0.80125	0.998477
CSAD	3.5252	-4.60028	1.55245	-2.96323	0.00304425	0.154534
CSDAP1	7.22214	0.0139813	0.714373	0.0195714	0.984385	0.998477
CSDE1	338.267	0.0475546	0.231214	0.205674	0.837046	0.998477
CSE1L	128.525	0.0335971	0.524848	0.064013	0.94896	0.998477
CSF1	15.9775	0.144151	0.819661	0.175866	0.860399	0.998477
CSGALNACT2	16.3832	-0.77755	1.04478	-0.744223	0.456741	0.998477
CSNK1A1	28.1717	0.205035	0.42182	0.486072	0.626916	0.998477
CSNK1A1P1	26.341	-0.142321	0.503707	-0.282547	0.777524	0.998477
CSNK1D	6.20236	-0.891207	1.1211	-0.794941	0.426648	0.998477
CSNK1E	3.46355	-1.03025	1.71072	-0.602234	0.547018	0.998477
CSNK1G3	9.39324	-0.0873849	0.979402	-0.0892227	0.928905	0.998477
CSNK2A1	7.69754	-0.03004	0.787045	-0.0381681	0.969554	0.998477
CSNK2A2	6.37143	-2.74403	1.35213	-2.02942	0.0424155	0.625957
CSNK2B	4.289	0.409125	0.963197	0.424758	0.671013	0.998477
CSPP1	4.49528	5.59333	2.71509	2.06009	0.0393896	0.613349
CSRNP1	3.5957	1.24549	1.07063	1.16333	0.244696	0.998477
CSRP1	140.319	0.0599071	0.236595	0.253205	0.80011	0.998477
CSRP2	11.3288	-2.26334	0.653168	-3.46517	0.000529897	0.051236
CST3	165.652	-0.469423	0.385528	-1.21761	0.223372	0.995188
CSTB	9.39916	0.234245	0.765843	0.305865	0.759707	0.998477
CSTF1	25.2963	-0.998319	0.738338	-1.35212	0.176338	0.955557
CSTF2	14.5982	-1.8986	0.850968	-2.23111	0.0256739	0.507355
CSTF2T	4.61933	-0.0678156	0.985817	-0.0687913	0.945156	0.998477
CSTF3	13.3895	0.473031	1.36037	0.347721	0.72805	0.998477
CTB-152G17.4	5.65049	-0.314583	0.834203	-0.377106	0.706094	0.998477
CTB-158E9.2	8.17956	0.243647	0.706856	0.344692	0.730326	0.998477
CTB-167G5.3	4.17131	-0.23013	0.916964	-0.250969	0.801838	0.998477
CTB-33G10.1	68.1695	0.091753	0.313315	0.292846	0.76964	0.998477
CTB-47B8.5	3.39273	1.20701	1.24039	0.973084	0.330511	0.998477
CTB-50L17.10	4.49836	0.176635	2.61092	0.0676525	0.946062	0.998477
CTB-52I2.4	9.97051	0.421171	0.666136	0.632259	0.527217	0.998477
CTBP1	5.37368	0.703158	1.81403	0.387622	0.698296	0.998477
CTBP2	5.08056	1.06333	0.84691	1.25554	0.209284	0.984251
CTBP2P4	3.61424	1.63275	1.09052	1.49722	0.134336	0.898712
CTBP2P8	3.5797	1.1595	1.02498	1.13125	0.257952	0.998477
CTBS	31.9781	0.508644	0.524575	0.969631	0.332231	0.998477
CTC-308K20.3	33.8749	0.902376	0.37834	2.3851	0.0170747	0.401973
CTC-329H14.1	166.843	-0.056284	0.239036	-0.235463	0.813849	0.998477
CTC-360J11.4	2.87021	-0.495262	1.23822	-0.39998	0.689171	0.998477
CTC-422A18.2	14.2805	0.0799832	0.568245	0.140755	0.888064	0.998477
CTC-451P13.1	156.247	-0.0227405	0.299032	-0.0760471	0.939382	0.998477
CTC-455F18.3	3.71565	-0.320831	1.23744	-0.259269	0.795428	0.998477
CTC-507E12.1	3.09377	0.601494	1.10179	0.545927	0.585116	0.998477
CTC-512J14.5	7.3645	-0.901957	0.766809	-1.17625	0.239496	0.998477
CTC-527H23.1	5.01805	0.335135	0.828151	0.404678	0.685714	0.998477
CTC-534B23.1	3.32859	0.258796	1.15337	0.224383	0.82246	0.998477
CTCF	10.6716	-1.4203	1.18039	-1.20324	0.228882	0.998477
CTD-2012J19.2	4.59922	0.408715	0.933421	0.437867	0.661482	0.998477
CTD-2015B23.2	5.60506	0.241065	0.826809	0.291561	0.770622	0.998477
CTD-2026D20.3	4.38016	-0.348486	1.06387	-0.327564	0.743241	0.998477
CTD-2026G22.1	3.6327	-4.68023	1.61368	-2.90034	0.00372754	0.179143
CTD-2033A16.2	33.4409	0.0911149	0.344346	0.264603	0.791316	0.998477
CTD-2033D24.2	17.2478	-0.586909	0.454499	-1.29133	0.196588	0.963022
CTD-2060C23.1	17.565	0.917244	0.606534	1.51227	0.130464	0.894205
CTD-2183H9.3	5.6532	0.728898	0.942226	0.773591	0.439173	0.998477
CTD-2228K2.2	5.88639	0.887325	0.836993	1.06013	0.289083	0.998477
CTD-2270N23.1	31.8145	1.393	0.569424	2.44633	0.0144321	0.357532
CTD-2287O16.1	4.69513	-0.432913	0.965557	-0.448356	0.653896	0.998477
CTD-2325K12.1	3.00867	-0.290045	1.05442	-0.275076	0.783258	0.998477
CTD-2538A21.1	39.1567	0.231501	0.401149	0.577094	0.563876	0.998477
CTD-2560C21.1	7.77361	-0.751372	0.664194	-1.13125	0.257948	0.998477
CTD-2620I22.2	52.6052	0.499368	0.337513	1.47955	0.138993	0.903547
CTD-2651C21.3	15.5112	0.383152	0.492814	0.77748	0.436876	0.998477
CTD-2666L21.3	3.65875	0.735851	1.08577	0.677725	0.497946	0.998477
CTDSP1	8.42804	-0.748901	0.767769	-0.975425	0.329349	0.998477
CTDSP2	12.9038	-0.835422	0.575363	-1.45199	0.146504	0.916392
CTGF	44.2384	-0.962294	0.444692	-2.16396	0.0304678	0.550977
CTH	21.9041	-0.403198	0.95696	-0.421332	0.673513	0.998477
CTHRC1	235.356	-0.896448	0.329289	-2.72237	0.00648146	0.242592
CTIF	4.88101	1.78202	1.25271	1.42253	0.154871	0.928678
CTNNA1	30.9571	0.503204	0.487462	1.03229	0.301934	0.998477
CTNNA1P1	20.4533	-0.178569	0.586878	-0.30427	0.760923	0.998477
CTNNAL1	94.6094	-0.290595	0.478252	-0.607619	0.543441	0.998477
CTNNB1	77.6255	-0.439356	0.557657	-0.787859	0.430779	0.998477
CTNNBL1	22.7098	-0.4058	0.474685	-0.854882	0.392616	0.998477
CTNND1	18.518	0.278834	0.760011	0.366881	0.713708	0.998477
CTNS	14.1574	-0.0804372	0.977404	-0.0822968	0.934411	0.998477
CTPS1	22.2153	0.789926	1.3559	0.582586	0.560172	0.998477
CTR9	23.7936	-0.584691	0.683703	-0.855182	0.39245	0.998477
CTSA	53.9618	0.663728	0.323611	2.05101	0.0402664	0.618299
CTSB	1893.49	0.108149	0.135051	0.800804	0.423245	0.998477
CTSC	38.0021	-0.422364	0.927166	-0.455543	0.648719	0.998477
CTSF	10.8082	-0.637503	0.713142	-0.893935	0.371356	0.998477
CTSK	1317.36	0.162955	0.168776	0.965509	0.33429	0.998477
CTSL	146.66	0.27409	0.276756	0.990365	0.321996	0.998477
CTSO	15.616	-0.972623	0.68157	-1.42703	0.15357	0.924971
CTSS	7.68025	0.258078	1.53993	0.16759	0.866906	0.998477
CTSZ	11.0652	0.360257	0.705398	0.510715	0.609551	0.998477
CTTN	119.191	0.00626093	0.251264	0.0249177	0.980121	0.998477
CTTNBP2NL	8.19658	-2.03313	0.955395	-2.12805	0.0333328	0.568759
CUEDC2	39.7483	0.106707	0.505987	0.21089	0.832973	0.998477
CUL1	10.3532	-0.402802	0.647925	-0.62168	0.534152	0.998477
CUL1P1	6.22638	-0.232297	0.803071	-0.28926	0.772382	0.998477
CUL2	87.1311	-0.554537	0.667163	-0.831187	0.405868	0.998477
CUL3	10.3201	-3.98976	1.57651	-2.53075	0.0113818	0.317178
CUL4A	62.0805	-0.683395	1.10518	-0.618356	0.536341	0.998477
CUL4B	23.0645	0.552896	1.40607	0.39322	0.694157	0.998477
CUTA	13.6764	-0.240771	0.569936	-0.422452	0.672695	0.998477
CUTC	78.1329	0.44471	0.41831	1.06311	0.287731	0.998477
CUX1	47.9235	-0.22035	0.469012	-0.469817	0.638485	0.998477
CWC15	49.4738	-0.732405	0.405658	-1.80547	0.0710005	0.747009
CWC22	23.2153	0.4308	1.16387	0.370145	0.711274	0.998477
CWC25	17.0615	-1.46152	0.503199	-2.90445	0.00367899	0.177861
CWC27	51.9384	-0.320688	0.371239	-0.863832	0.38768	0.998477
CWF19L1	20.5578	0.328285	0.980468	0.334824	0.737757	0.998477
CXCL12	82.4381	-0.612913	0.365434	-1.67722	0.0934991	0.815681
CXorf38	3.44204	-1.25429	1.52411	-0.822964	0.410529	0.998477
CXorf40A	9.66739	-0.428618	0.777904	-0.550992	0.581639	0.998477
CXorf40B	15.9636	0.0546756	0.637535	0.0857609	0.931656	0.998477
CXorf56	3.47625	0.865061	1.17668	0.735174	0.462234	0.998477
CXXC1	5.08047	0.419259	1.00844	0.41575	0.677593	0.998477
CXXC5	4.69318	-1.37071	1.05021	-1.30518	0.191832	0.96228
CYB561A3	30.012	-0.285616	0.474838	-0.601502	0.547505	0.998477
CYB561D2	6.61189	-0.747018	0.781497	-0.955881	0.339132	0.998477
CYB5A	27.0543	0.191436	0.512491	0.37354	0.708746	0.998477
CYB5B	51.6362	0.313832	0.333023	0.942374	0.346001	0.998477
CYB5D2	29.25	-0.440301	0.429842	-1.02433	0.305678	0.998477
CYB5R1	25.9129	0.258898	0.518675	0.499152	0.617673	0.998477
CYB5R2	20.1343	-0.788493	0.545988	-1.44416	0.148694	0.917702
CYB5R3	344.1	0.0406928	0.154307	0.263713	0.792001	0.998477
CYB5R4	17.5428	-0.209939	1.07157	-0.195917	0.844675	0.998477
CYBRD1	158.818	0.0905739	0.347583	0.260582	0.794415	0.998477
CYC1	28.3421	-0.427328	0.438905	-0.973625	0.330243	0.998477
CYCS	28.5986	-0.659447	0.402866	-1.63689	0.101654	0.831451
CYFIP1	33.5554	0.805688	1.30512	0.617328	0.537018	0.998477
CYFIP2	4.68204	0.753802	3.03809	0.248117	0.804044	0.998477
CYP1B1	3.26158	-0.142895	1.15691	-0.123514	0.9017	0.998477
CYP20A1	13.3254	2.15463	1.2737	1.69163	0.0907157	0.809629
CYP2R1	3.33292	2.28218	1.78405	1.27921	0.200823	0.973202
CYP2U1	4.79321	0.470208	1.73526	0.270972	0.786413	0.998477
CYP3A5	8.29006	1.59274	1.0726	1.48493	0.137562	0.901759
CYP4V2	3.24031	0.475668	2.01681	0.235852	0.813548	0.998477
CYP51A1P1	20.3228	0.911871	0.518587	1.75838	0.0786833	0.762394
CYP51A1P2	26.3004	0.81387	0.394133	2.06497	0.0389263	0.611569
CYR61	142.509	0.0608378	0.244986	0.248332	0.803878	0.998477
CYSTM1	42.8516	0.124297	0.326806	0.380338	0.703694	0.998477
CYTH2	11.4776	0.033487	1.04096	0.0321693	0.974337	0.998477
CYTH3	3.31981	-1.43876	1.07799	-1.33467	0.181985	0.958551
CYTOR	8.4743	0.820017	0.715956	1.14535	0.252066	0.998477
DAAM1	5.04115	-1.01931	1.859	-0.548311	0.583479	0.998477
DAB1	3.11294	-5.24273	3.64478	-1.43842	0.150315	0.920533
DAB2	308.095	-0.022811	0.376551	-0.0605789	0.951695	0.998477
DAD1	15.1742	-0.657419	0.656047	-1.00209	0.316299	0.998477
DAG1	3.95401	0.243793	1.03695	0.235105	0.814128	0.998477
DAGLB	22.9031	0.889108	1.04115	0.85397	0.393121	0.998477
DANCR	8.41451	0.273725	0.883653	0.309766	0.756739	0.998477
DAP	29.7726	0.346557	0.459082	0.75489	0.450315	0.998477
DAP3	150.975	0.290625	0.493351	0.589084	0.555805	0.998477
DAP3P2	22.3253	0.432776	0.632196	0.684559	0.493622	0.998477
DARS	148.823	-0.469353	0.463142	-1.01341	0.310864	0.998477
DARS2	10.788	2.66174	1.82798	1.45611	0.145364	0.915937
DAXX	11.05	-0.453295	0.586591	-0.772762	0.439663	0.998477
DAZAP2	68.0686	0.152872	0.429478	0.355948	0.721879	0.998477
DBI	6.98861	-0.605828	1.02703	-0.589884	0.555268	0.998477
DBN1	25.193	-0.0901622	0.547638	-0.164638	0.869229	0.998477
DBNL	31.3557	0.123361	0.492615	0.25042	0.802262	0.998477
DBR1	14.0798	-0.333758	0.944095	-0.353522	0.723697	0.998477
DBT	3.09669	-1.20907	2.37921	-0.508182	0.611326	0.998477
DCAF10	4.5239	1.7414	1.75998	0.989445	0.322446	0.998477
DCAF11	9.21868	0.508423	0.645989	0.787046	0.431255	0.998477
DCAF12	10.8501	0.801603	1.12229	0.714255	0.47507	0.998477
DCAF13	10.7329	0.463139	0.638841	0.724969	0.468471	0.998477
DCAF13P1	11.8187	-0.0850311	0.573514	-0.148263	0.882135	0.998477
DCAF13P3	12.7533	0.0800566	0.577411	0.138647	0.889729	0.998477
DCAF16	3.69252	2.91725	1.3524	2.15709	0.0309988	0.553883
DCAF4	12.8019	0.405112	1.41713	0.285868	0.774979	0.998477
DCAF5	8.49041	-1.93514	1.06062	-1.82453	0.0680713	0.738142
DCAF6	43.9204	0.0756757	0.644312	0.117452	0.906502	0.998477
DCAF7	9.62264	0.0247121	0.645301	0.0382954	0.969452	0.998477
DCAKD	27.5786	0.235401	0.47145	0.499313	0.617559	0.998477
DCBLD2	12.7441	1.76962	0.592919	2.98459	0.00283955	0.149759
DCK	14.3116	0.656364	0.84775	0.774242	0.438787	0.998477
DCLRE1A	3.17431	-1.648	3.19522	-0.51577	0.606015	0.998477
DCLRE1C	6.37265	-2.05105	2.05586	-0.997661	0.318444	0.998477
DCN	2119.3	-1.38768	0.171598	-8.08678	6.1262e-16	1.65857e-12
DCP1B	18.6024	-0.347091	0.623143	-0.557	0.577527	0.998477
DCPS	24.8949	0.143791	0.451629	0.318382	0.750195	0.998477
DCTD	65.633	0.470773	0.46063	1.02202	0.306771	0.998477
DCTN1	12.8481	0.64116	0.634646	1.01026	0.312368	0.998477
DCTN2	119.528	0.718216	0.355393	2.02091	0.0432891	0.630097
DCTN3	47.5217	-0.0608544	0.37218	-0.163508	0.870119	0.998477
DCTN4	27.6668	-0.146414	0.803341	-0.182257	0.855381	0.998477
DCTN5	14.3958	-0.0785481	0.646764	-0.121448	0.903336	0.998477
DCTN6	15.6537	0.263917	0.581091	0.454174	0.649703	0.998477
DCTPP1	8.36599	-0.824668	0.676919	-1.21827	0.223123	0.995188
DCUN1D1	12.0164	-0.336443	1.01693	-0.330841	0.740765	0.998477
DCUN1D2	5.37572	-1.37653	1.58175	-0.870256	0.38416	0.998477
DCUN1D3	4.68059	0.187539	0.894786	0.209591	0.833987	0.998477
DCUN1D4	15.2117	-0.480205	0.954317	-0.503193	0.614829	0.998477
DCUN1D5	43.4943	-0.166908	0.48265	-0.345816	0.729481	0.998477
DCXR	12.5281	0.519004	0.726392	0.714496	0.474921	0.998477
DDA1	17.4174	-0.394043	0.538916	-0.731176	0.464672	0.998477
DDAH1	23.8794	-0.574921	0.469396	-1.22481	0.220646	0.991059
DDAH2	13.6454	-0.87777	0.578889	-1.5163	0.129443	0.890712
DDB1	191.67	-0.4431	0.368843	-1.20132	0.229626	0.998477
DDB2	42.4457	0.229109	0.418958	0.546855	0.584479	0.998477
DDIT3	10.7363	0.0197049	0.685909	0.0287282	0.977081	0.998477
DDOST	159.461	0.163442	0.261134	0.625893	0.531385	0.998477
DDR2	20.6687	-0.57322	0.832998	-0.688142	0.491364	0.998477
DDRGK1	17.3082	0.613864	0.749493	0.819038	0.412765	0.998477
DDX1	201.277	0.0475158	0.31154	0.152519	0.878777	0.998477
DDX17	4.99363	-0.572354	1.45783	-0.392607	0.69461	0.998477
DDX18P1	3.266	-0.227969	1.0603	-0.215004	0.829764	0.998477
DDX18P3	4.26547	-0.591611	0.907266	-0.652081	0.514349	0.998477
DDX19A	11.1287	-0.222584	0.975698	-0.228128	0.819547	0.998477
DDX19B	20.8332	0.266999	0.64175	0.416049	0.677374	0.998477
DDX20	7.54774	-0.310592	0.891406	-0.348429	0.727518	0.998477
DDX21	14.5011	0.99338	1.27412	0.779661	0.43559	0.998477
DDX23	7.39178	1.25135	1.0021	1.24872	0.211768	0.98627
DDX24	67.4987	-0.515955	0.506381	-1.01891	0.308247	0.998477
DDX27	58.1008	0.297479	0.558614	0.532531	0.594359	0.998477
DDX31	10.2011	1.6727	1.49806	1.11658	0.264175	0.998477
DDX39A	6.71374	-1.32417	0.793563	-1.66864	0.0951884	0.817252
DDX3X	13.4999	0.155809	0.785013	0.198479	0.84267	0.998477
DDX42	27.6228	0.278936	0.666232	0.418677	0.675452	0.998477
DDX46	35.3039	-0.771598	2.03464	-0.37923	0.704517	0.998477
DDX49	62.0274	0.0211177	0.298553	0.0707337	0.94361	0.998477
DDX5	166.755	-0.533462	0.26207	-2.03557	0.0417938	0.621702
DDX50	6.80432	0.116575	0.756174	0.154165	0.87748	0.998477
DDX50P1	9.81012	-0.113243	0.619147	-0.182901	0.854876	0.998477
DDX50P2	9.88295	-0.270293	0.649659	-0.416054	0.67737	0.998477
DDX52	17.9988	-1.83553	1.23905	-1.4814	0.138499	0.903547
DDX54	7.13574	0.29885	1.14933	0.26002	0.794848	0.998477
DDX55	2.86615	-0.654497	2.5011	-0.261684	0.793565	0.998477
DDX56	35.9851	0.346007	0.428519	0.807448	0.419408	0.998477
DDX58	8.75882	-6.73809	2.40262	-2.80448	0.00503983	0.207784
DDX59	9.14913	0.74309	0.975493	0.761759	0.446204	0.998477
DDX60	18.8844	-7.85877	3.63296	-2.16319	0.0305269	0.550977
DEAF1	9.31175	-1.02789	0.916587	-1.12143	0.262106	0.998477
DECR1	150.542	-0.603219	0.256689	-2.35	0.0187736	0.433179
DEDD	3.81866	-0.76311	1.07378	-0.710679	0.477283	0.998477
DEF8	7.77751	0.394589	0.945404	0.417376	0.676404	0.998477
DEGS1	52.5649	0.174037	0.374252	0.465026	0.641913	0.998477
DEK	34.8778	0.149404	0.690441	0.21639	0.828684	0.998477
DENND2D	4.27455	5.50909	2.80377	1.96489	0.0494272	0.661153
DENND5A	10.1025	1.86502	1.03706	1.79838	0.0721162	0.747009
DENND6B	5.51674	-0.0249428	1.26178	-0.019768	0.984228	0.998477
DENR	39.6996	-0.0923135	0.416226	-0.221787	0.82448	0.998477
DEPDC5	4.3099	-5.70698	2.78496	-2.04922	0.0404407	0.618299
DEPDC7	6.62401	-0.359788	1.83975	-0.195563	0.844952	0.998477
DEPTOR	64.587	-0.292095	0.391028	-0.746991	0.455069	0.998477
DERA	80.3491	-0.591575	0.408493	-1.44819	0.147564	0.916392
DERL1	36.5799	-0.615539	0.41321	-1.48965	0.136316	0.898712
DERL2	81.0598	-1.10439	0.549306	-2.01052	0.0443764	0.636794
DESI1	11.0354	0.680707	1.04903	0.648889	0.51641	0.998477
DESI2	2.88775	0.443134	1.1177	0.396469	0.691759	0.998477
DET1	3.35713	0.42618	2.54674	0.167343	0.8671	0.998477
DFFA	17.6492	-0.717652	0.850964	-0.84334	0.399038	0.998477
DFNA5	104.58	0.661838	0.427948	1.54654	0.121974	0.878761
DGCR14	17.6256	1.84424	0.609603	3.02532	0.00248368	0.138017
DGCR2	17.7296	0.48637	0.87272	0.557304	0.57732	0.998477
DGCR6	27.695	0.709149	0.48089	1.47466	0.140304	0.905068
DGCR6L	49.0021	0.503497	0.362544	1.38879	0.164897	0.936217
DGKA	12.4876	1.17093	0.948102	1.23502	0.216823	0.991059
DGUOK	29.1749	0.130181	0.581237	0.223973	0.822778	0.998477
DHCR24	57.284	1.52079	0.54281	2.8017	0.00508337	0.208521
DHCR7	83.9338	1.17249	0.329477	3.55864	0.00037278	0.0474381
DHDDS	15.9114	-0.5396	0.850459	-0.634481	0.525767	0.998477
DHPS	18.0177	-0.995132	0.858733	-1.15884	0.246523	0.998477
DHRS1	15.5065	1.02138	0.653182	1.56369	0.117889	0.86801
DHRS12	11.2761	-0.668229	1.84338	-0.362502	0.716977	0.998477
DHRS3	6.15317	-0.248629	1.11822	-0.222344	0.824046	0.998477
DHRS4	16.2043	0.575151	0.647766	0.887898	0.374595	0.998477
DHRS4-AS1	2.77336	-0.164114	1.42047	-0.115535	0.908021	0.998477
DHRS4L1	3.21733	0.418967	1.18206	0.354438	0.723011	0.998477
DHRS4L2	15.9277	0.553366	0.679926	0.813862	0.415724	0.998477
DHRS7	170.725	0.207033	0.21296	0.972171	0.330965	0.998477
DHRS7B	30.417	0.648114	0.655469	0.98878	0.322771	0.998477
DHRSX	34.2825	0.733599	0.398378	1.84147	0.0655534	0.731743
DHX15	137.017	-0.703894	0.466604	-1.50855	0.131414	0.896824
DHX29	16.017	-1.23105	0.811178	-1.5176	0.129114	0.890712
DHX30	14.7217	-0.80385	0.724064	-1.11019	0.266916	0.998477
DHX32	4.42215	-1.05553	1.73113	-0.609733	0.542039	0.998477
DHX35	13.6619	-0.564672	1.04092	-0.542476	0.58749	0.998477
DHX36	15.0711	0.414335	0.930893	0.445094	0.656252	0.998477
DHX38	6.37524	-0.528129	1.20879	-0.436905	0.66218	0.998477
DHX40	13.902	0.774703	1.30988	0.59143	0.554233	0.998477
DHX57	11.1274	1.22049	0.849794	1.43622	0.15094	0.921756
DHX58	3.68339	0.754863	2.44969	0.308146	0.757971	0.998477
DHX8	15.563	-0.835423	1.29804	-0.643605	0.519831	0.998477
DHX9	2.91178	-0.550212	1.45183	-0.378977	0.704705	0.998477
DHX9P1	5.87953	-0.285577	0.840433	-0.339798	0.734009	0.998477
DIABLO	32.3946	-0.338244	0.366447	-0.923036	0.355988	0.998477
DIAPH1	4.01562	0.246096	1.52952	0.160897	0.872174	0.998477
DIAPH2	8.13504	1.57026	1.82787	0.859062	0.390306	0.998477
DICER1	4.34634	-4.11835	2.1985	-1.87326	0.061033	0.717855
DIEXF	19.0073	-0.477046	1.04501	-0.4565	0.64803	0.998477
DIMT1	85.5264	-0.427667	0.23959	-1.785	0.0742617	0.747403
DIRC2	10.5104	-0.157168	1.49509	-0.105123	0.916278	0.998477
DIS3	9.33574	-0.37087	1.11444	-0.332787	0.739295	0.998477
DIS3L	18.616	3.02467	0.979211	3.08889	0.00200905	0.118869
DKC1	35.697	-1.14851	0.887999	-1.29336	0.195885	0.96228
DKK1	17.0041	1.321	0.555566	2.37775	0.0174185	0.407703
DKK3	48.5437	0.24795	0.670751	0.36966	0.711636	0.998477
DLAT	19.3832	0.290269	1.02483	0.283236	0.776996	0.998477
DLC1	12.0936	-0.288051	0.759154	-0.379436	0.704364	0.998477
DLD	108.515	0.152813	0.45782	0.333785	0.738542	0.998477
DLG2	6.55968	6.12717	2.23477	2.74175	0.00611133	0.236523
DLG5	5.46868	-0.585578	1.65854	-0.353069	0.724036	0.998477
DLGAP4	25.5384	0.245024	0.508433	0.481921	0.629862	0.998477
DLSTP1	2.83995	1.25684	1.38348	0.908466	0.363632	0.998477
DMAP1	13.4927	0.757846	0.695495	1.08965	0.275867	0.998477
DMGDH	9.08773	0.61448	1.4613	0.420503	0.674118	0.998477
DMTF1	8.39598	-2.78147	2.25474	-1.23361	0.217348	0.991059
DMXL1	5.31131	2.47064	2.32908	1.06078	0.288791	0.998477
DMXL2	3.92228	5.38174	2.82437	1.90546	0.0567198	0.702646
DNAAF5	4.31225	0.559118	1.33663	0.418306	0.675724	0.998477
DNAH14	4.54067	1.28829	2.29602	0.561095	0.574732	0.998477
DNAJA1	55.0984	-0.381903	0.432909	-0.882179	0.37768	0.998477
DNAJA1P3	33.3731	-0.379485	0.355601	-1.06717	0.285897	0.998477
DNAJA2	107.998	0.330278	0.355405	0.929299	0.352734	0.998477
DNAJA3	32.149	-0.0926416	0.493527	-0.187713	0.851101	0.998477
DNAJB1	41.5734	0.0109376	0.303402	0.0360499	0.971243	0.998477
DNAJB11	36.9782	-0.846122	0.54939	-1.54011	0.123533	0.878761
DNAJB12	11.0666	-0.0780829	0.657748	-0.118713	0.905503	0.998477
DNAJB14	4.53294	-0.440306	1.06726	-0.412556	0.679932	0.998477
DNAJB4	60.1367	-0.0174486	0.335109	-0.0520683	0.958474	0.998477
DNAJB5	5.5117	-0.93832	1.20555	-0.778333	0.436373	0.998477
DNAJB6	5.77698	-1.07005	0.896866	-1.1931	0.232832	0.998477
DNAJB9	33.0314	-0.632119	0.41871	-1.50968	0.131124	0.896596
DNAJC1	16.4885	0.629603	1.31558	0.478572	0.632243	0.998477
DNAJC10	169.948	0.714083	0.428249	1.66745	0.0954255	0.817773
DNAJC11	44.8616	0.484764	0.736367	0.658318	0.510334	0.998477
DNAJC12	17.4671	-0.942831	0.901125	-1.04628	0.295431	0.998477
DNAJC13	10.5337	-1.50539	1.47172	-1.02288	0.306364	0.998477
DNAJC15	11.0442	-0.270062	0.924362	-0.292161	0.770164	0.998477
DNAJC16	7.01676	2.43106	1.88011	1.29304	0.195996	0.96228
DNAJC17	3.99434	-1.21617	1.40809	-0.863705	0.38775	0.998477
DNAJC18	17.6826	0.27071	0.688815	0.393008	0.694314	0.998477
DNAJC19	5.507	0.283722	0.835999	0.339381	0.734323	0.998477
DNAJC19P9	5.10337	0.127763	0.836092	0.152809	0.878549	0.998477
DNAJC2	32.2907	1.4338	0.631404	2.27081	0.0231583	0.483527
DNAJC21	11.7931	-0.131626	1.26493	-0.104058	0.917123	0.998477
DNAJC3	7.54514	-0.484598	1.15624	-0.419116	0.675131	0.998477
DNAJC4	4.49862	-0.920064	1.02613	-0.896637	0.369912	0.998477
DNAJC7	18.9514	-0.351073	0.533907	-0.657555	0.510824	0.998477
DNAJC8	31.9697	-0.454437	0.345641	-1.31477	0.188588	0.960602
DNAJC8P1	24.9578	-0.178356	0.405303	-0.440056	0.659897	0.998477
DNAL4	10.6367	1.04371	0.663492	1.57306	0.115705	0.862955
DNALI1	5.03171	0.0618509	1.50545	0.0410847	0.967228	0.998477
DNASE2	33.4922	0.781803	0.494654	1.58051	0.113991	0.859851
DNM1	11.6953	3.13019	1.43148	2.18669	0.0287655	0.539562
DNM1L	56.4872	0.0976174	0.905633	0.107789	0.914163	0.998477
DNM2	17.4782	-0.860581	1.59609	-0.539182	0.589761	0.998477
DNM3OS	5.45229	-2.7688	1.15597	-2.39521	0.016611	0.394349
DNMBP	2.76622	0.860926	2.05521	0.4189	0.675289	0.998477
DNMT3B	3.96193	-5.59337	3.51431	-1.5916	0.111475	0.857033
DNPEP	66.2373	-1.05073	0.340381	-3.08694	0.00202228	0.118869
DNPH1	3.77921	0.236223	0.958395	0.246478	0.805312	0.998477
DNTTIP1	35.0549	-0.470401	0.581369	-0.809127	0.418442	0.998477
DNTTIP2	47.6996	-0.278234	0.419829	-0.662731	0.507503	0.998477
DOCK1	30.14	0.490538	0.453948	1.0806	0.279873	0.998477
DOCK7	10.8173	0.270222	1.29731	0.208294	0.834999	0.998477
DOCK9	4.3433	-0.499155	2.43062	-0.205361	0.83729	0.998477
DOK1	6.76062	0.371838	0.725512	0.512518	0.608288	0.998477
DOK5	42.5724	-0.160171	0.373391	-0.428964	0.66795	0.998477
DOLK	5.78506	-0.742527	0.819346	-0.906244	0.364807	0.998477
DOLPP1	2.75595	-0.585772	1.91855	-0.305319	0.760123	0.998477
DOPEY2	4.06161	2.20634	2.46324	0.895708	0.370409	0.998477
DPAGT1	9.69998	-0.473357	0.62241	-0.760523	0.446942	0.998477
DPCD	19.1885	0.32009	0.526146	0.608368	0.542944	0.998477
DPF2	18.5963	-0.567189	0.711435	-0.797246	0.425308	0.998477
DPH1	3.72151	-0.822772	1.94591	-0.422822	0.672425	0.998477
DPH3	9.68695	0.286788	0.804225	0.356602	0.72139	0.998477
DPH5	67.9408	0.791464	0.343253	2.30577	0.0211232	0.460763
DPH6	13.9759	-1.16964	1.21544	-0.962318	0.33589	0.998477
DPH7	8.36513	0.0298349	1.32262	0.0225575	0.982003	0.998477
DPM1	76.8205	0.18894	0.255691	0.738939	0.459944	0.998477
DPM2	24.5359	0.0189537	0.565664	0.033507	0.97327	0.998477
DPP3	12.5438	-1.09687	0.825814	-1.32824	0.1841	0.958624
DPP3P2	4.27335	-1.0126	1.09014	-0.928874	0.352954	0.998477
DPP4	225.08	0.456888	0.339325	1.34646	0.178154	0.955709
DPP7	16.1387	-0.601985	0.553619	-1.08736	0.276877	0.998477
DPP8	6.64053	4.66176	2.32782	2.00263	0.0452171	0.641169
DPP9	8.82697	1.18017	1.33308	0.885297	0.375996	0.998477
DPT	161.042	-2.31086	0.249122	-9.27601	1.75949e-20	1.42905e-16
DPY19L4	3.31437	1.1196	1.70516	0.656596	0.511441	0.998477
DPY30	7.17582	0.429218	0.844696	0.508133	0.61136	0.998477
DPYD	45.4323	0.114358	0.561926	0.20351	0.838736	0.998477
DPYSL2	93.8571	-0.23211	0.504858	-0.459753	0.645693	0.998477
DPYSL3	23.5099	-0.32522	0.936728	-0.347188	0.72845	0.998477
DR1	10.8991	0.213997	0.603188	0.354777	0.722757	0.998477
DRAM1	22.1871	0.143181	0.580197	0.24678	0.805079	0.998477
DRAM2	59.9238	-0.0406747	0.403576	-0.100786	0.919721	0.998477
DRAP1	9.87029	0.239334	0.708492	0.337808	0.735508	0.998477
DRG2	59.6876	-0.279341	0.548039	-0.50971	0.610254	0.998477
DROSHA	41.3727	1.42658	1.02159	1.39643	0.162585	0.934806
DSCC1	5.27018	1.29782	1.49355	0.868951	0.384874	0.998477
DSCR3	32.2636	-0.552058	0.555341	-0.994089	0.32018	0.998477
DSE	9.46623	-0.570165	0.890317	-0.640407	0.521908	0.998477
DSN1	11.8452	-1.14324	0.953702	-1.19874	0.230629	0.998477
DSP	5.58284	0.445904	1.27656	0.349301	0.726864	0.998477
DST	15.5978	0.378091	1.05363	0.358845	0.719711	0.998477
DSTN	348.173	0.411265	0.164637	2.498	0.0124895	0.334783
DSTNP2	90.7007	0.407085	0.237085	1.71704	0.0859713	0.79078
DSTNP4	17.3614	0.118379	0.522131	0.226723	0.820639	0.998477
DSTNP5	3.082	0.841548	1.19372	0.70498	0.480823	0.998477
DTD1	65.1661	-0.156262	0.459865	-0.3398	0.734007	0.998477
DTNBP1	18.9912	-1.03607	0.529746	-1.95578	0.0504914	0.661153
DTWD1	21.0627	-0.555299	0.52027	-1.06733	0.285823	0.998477
DTX2	3.48764	-0.611338	2.06324	-0.2963	0.767001	0.998477
DTYMK	28.4344	-0.183607	0.581918	-0.315521	0.752366	0.998477
DUS2	12.8452	-0.354549	1.04728	-0.338544	0.734953	0.998477
DUS4L	3.7283	1.40935	1.54301	0.913379	0.361043	0.998477
DUSP1	6.01796	0.374997	0.946682	0.396117	0.692019	0.998477
DUSP10	6.1562	-1.19575	0.971854	-1.23038	0.218556	0.991059
DUSP11	80.6848	-0.987013	0.290209	-3.40104	0.0006713	0.0599154
DUSP12	29.9705	-0.0503966	0.395891	-0.127299	0.898704	0.998477
DUSP14	30.7563	0.392349	0.413829	0.948096	0.343081	0.998477
DUSP22	9.2064	0.581086	0.971888	0.597894	0.549911	0.998477
DUSP3	13.7436	-0.119787	0.631356	-0.189729	0.849522	0.998477
DUSP4	2.91322	-0.642094	1.35087	-0.475319	0.63456	0.998477
DUSP6	4.967	1.2075	0.921799	1.30994	0.190217	0.96228
DUT	25.6228	0.330395	0.492213	0.671245	0.502065	0.998477
DUXAP8	15.4172	-0.169098	0.550755	-0.30703	0.75882	0.998477
DUXAP9	13.9493	0.0466504	0.616424	0.0756791	0.939674	0.998477
DYM	61.4993	-0.092491	0.423465	-0.218415	0.827106	0.998477
DYNC1H1	5.81562	0.906004	0.962775	0.941034	0.346687	0.998477
DYNC1I2	6.16385	-0.22895	0.780694	-0.293265	0.76932	0.998477
DYNC1I2P1	16.4393	-0.0326574	0.509798	-0.0640595	0.948923	0.998477
DYNC1LI1	53.4874	0.899733	0.84225	1.06825	0.285408	0.998477
DYNC1LI2	29.8615	0.0261186	0.655851	0.039824	0.968233	0.998477
DYNC2H1	6.36226	3.80492	1.80143	2.11217	0.0346722	0.581053
DYNC2LI1	71.791	0.811259	0.424787	1.9098	0.056159	0.699575
DYNLL1	9.3464	-0.425565	0.865704	-0.491583	0.623014	0.998477
DYNLRB1	8.71657	-0.552925	0.901226	-0.613526	0.539529	0.998477
DYNLT1	17.1101	-1.07298	0.566876	-1.8928	0.0583843	0.713078
DYNLT3	18.6387	0.194229	0.607649	0.31964	0.749241	0.998477
DYRK4	11.8208	0.363034	0.850364	0.426916	0.669441	0.998477
DZANK1	3.4234	5.18592	3.69168	1.40476	0.160093	0.934106
DZIP1	5.46698	0.279226	1.61833	0.172539	0.863014	0.998477
[truncated: 6,123 more rows]

## Sheet: PS vs BM - 5326 DESeq2 results
GeneID	Base mean	log2(FC)	StdErr	Wald-Stats	P-value	P-adj
2002-03-01	19.0705	-0.71933	0.844047	-0.852239	0.394081	0.999811
2002-09-01	368.677	0.205398	0.227378	0.90333	0.366351	0.999811
2005-03-01	10.6526	-0.304624	1.49736	-0.203441	0.83879	0.999811
2006-03-01	22.5673	1.52213	3.79907	0.400659	0.688672	0.999811
2006-09-01	31.0596	0.269132	0.653228	0.412002	0.680338	0.999811
2007-03-01	62.3686	0.702775	0.419524	1.67517	0.0939006	0.999811
2007-09-01	69.0419	0.092016	0.506537	0.181657	0.855852	0.999811
2009-09-01	11.2102	1.24224	1.41656	0.876946	0.380516	0.999811
2010-09-01	6.95353	0.859766	1.31242	0.6551	0.512403	0.999811
2011-09-01	113.463	0.352431	0.637463	0.552865	0.580356	0.999811
AAAS	12.2389	-0.0638563	1.07142	-0.0595997	0.952474	0.999811
AACS	37.6632	0.832601	0.677425	1.22907	0.219046	0.999811
AAGAB	35.0189	0.0555448	0.816903	0.0679943	0.94579	0.999811
AAMP	38.4802	-0.298272	0.652052	-0.457437	0.647357	0.999811
AAR2	23.5772	-0.748508	0.995483	-0.751905	0.452108	0.999811
AARS	197.072	-0.539202	0.358598	-1.50364	0.132674	0.999811
AASDHPPT	16.1097	0.62981	0.874349	0.720318	0.471329	0.999811
AATF	23.6292	-0.887497	0.780388	-1.13725	0.255433	0.999811
ABCA6	10.4863	-1.67079	1.71805	-0.972491	0.330807	0.999811
ABCA9	6.84538	0.157884	2.30229	0.0685771	0.945326	0.999811
ABCB8	9.39118	-0.26172	1.04625	-0.250151	0.802471	0.999811
ABCC1	7.23106	1.28804	2.0536	0.627209	0.530522	0.999811
ABCC5	7.57095	-0.613139	1.18516	-0.517346	0.604915	0.999811
ABCD3	16.9654	1.95293	1.41677	1.37844	0.168067	0.999811
ABCD4	25.3615	0.688963	0.861174	0.800028	0.423695	0.999811
ABCF2	11.0683	0.236396	0.94248	0.250824	0.80195	0.999811
ABCF2P1	9.23667	-0.16445	1.02003	-0.161221	0.871919	0.999811
ABCF3	7.53095	-0.290316	1.36266	-0.213052	0.831286	0.999811
ABHD10	11.928	0.303802	1.11145	0.273338	0.784593	0.999811
ABHD12	15.3835	0.448314	1.42602	0.314381	0.753232	0.999811
ABHD14B	22.0987	0.622442	0.706828	0.880614	0.378527	0.999811
ABHD2	18.7361	1.405	1.35836	1.03434	0.300978	0.999811
ABHD4	77.6882	-0.180186	0.473227	-0.38076	0.703381	0.999811
ABHD5	15.2788	-0.294426	0.950211	-0.309853	0.756673	0.999811
ABI1	33.0652	-1.00952	0.78567	-1.28492	0.19882	0.999811
ABI2	25.7196	-1.06774	0.794856	-1.34331	0.179172	0.999811
ABI3BP	59.515	1.71877	0.484369	3.54847	0.000387471	0.06657
ABLIM3	10.7786	1.61549	1.29197	1.25041	0.211149	0.999811
ABT1	9.51448	0.240125	1.17879	0.203705	0.838584	0.999811
ABTB1	7.16748	0.391265	1.60353	0.244002	0.807229	0.999811
AC000089.3	35.7194	0.17962	0.535804	0.335234	0.737448	0.999811
AC004386.4	20.0693	-0.00147468	0.733087	-0.0020116	0.998395	0.999811
AC004453.8	7.60727	0.152996	1.29364	0.118268	0.905855	0.999811
AC005795.1	36.898	0.213102	0.538536	0.395706	0.692322	0.999811
AC005822.1	11.7559	-0.933853	1.02592	-0.910262	0.362684	0.999811
AC007041.2	16.5735	-0.358939	0.823248	-0.436004	0.662834	0.999811
AC007229.3	7.29736	-0.210514	1.15219	-0.182707	0.855028	0.999811
AC007318.5	39.0689	0.188644	0.531405	0.354991	0.722596	0.999811
AC007560.1	20.118	-0.0619979	0.797489	-0.0777414	0.938034	0.999811
AC007881.4	7.13028	-0.0406918	1.177	-0.0345725	0.972421	0.999811
AC008427.2	8.00502	0.954499	1.11126	0.858935	0.390376	0.999811
AC009245.3	357.469	-0.0544431	0.21174	-0.257123	0.797084	0.999811
AC009948.7	10.5103	-0.301651	0.987017	-0.305619	0.759895	0.999811
AC009963.6	16.1538	-0.792327	0.935461	-0.846991	0.397	0.999811
AC010468.1	148.643	-0.384696	0.285878	-1.34566	0.178411	0.999811
AC010878.3	46.4669	0.122071	0.493112	0.247552	0.804481	0.999811
AC012066.1	11.6215	-0.131072	0.962429	-0.136189	0.891672	0.999811
AC013461.1	8.90026	0.11213	1.90344	0.0589094	0.953024	0.999811
AC013470.6	19.1508	0.21427	0.812405	0.263748	0.791974	0.999811
AC015849.14	6.69141	-0.0133971	1.24059	-0.010799	0.991384	0.999811
AC016292.3	20.2102	-0.106931	0.7315	-0.146181	0.883779	0.999811
AC016734.2	19.0437	-0.547857	0.736994	-0.743367	0.45726	0.999811
AC016739.2	20.2683	-0.426096	0.721675	-0.590426	0.554905	0.999811
AC022210.2	11.0473	0.0784878	0.975046	0.0804965	0.935842	0.999811
AC024560.3	11.9556	0.598451	0.985923	0.606996	0.543854	0.999811
AC026271.5	12.1373	0.519135	0.94271	0.550683	0.581851	0.999811
AC027612.6	11.6283	0.334154	1.03808	0.321895	0.747532	0.999811
AC064850.4	18.0065	0.510292	0.752327	0.678286	0.497591	0.999811
AC068657.2	10.8506	-1.06075	1.11634	-0.9502	0.342011	0.999811
AC074019.2	12.2145	-1.17811	1.00548	-1.17168	0.241325	0.999811
AC079248.1	14.1698	0.43823	0.838084	0.522894	0.601048	0.999811
AC079250.1	22.5638	-0.0989419	0.698603	-0.141628	0.887374	0.999811
AC083873.4	56.2252	0.0425235	0.488678	0.0870174	0.930658	0.999811
AC083899.3	17.6671	-0.622542	1.33193	-0.467397	0.640216	0.999811
AC092106.1	12.9846	-0.617215	0.933417	-0.661243	0.508456	0.999811
AC092646.2	7.8215	-0.112488	1.27811	-0.0880117	0.929867	0.999811
AC092664.1	7.1335	-0.0334747	1.29791	-0.0257912	0.979424	0.999811
AC093616.4	21.3602	1.02319	1.07832	0.948878	0.342683	0.999811
AC097533.1	9.52497	0.608379	1.05065	0.579048	0.562557	0.999811
AC098614.2	50.8924	0.069986	0.465999	0.150185	0.880619	0.999811
AC104297.1	13.895	0.234053	0.922411	0.25374	0.799696	0.999811
AC104651.2	36.8895	0.0239365	0.561551	0.0426257	0.966	0.999811
AC111200.7	6.76849	-0.294007	1.20286	-0.244423	0.806903	0.999811
AC113404.1	15.5109	0.0800951	0.837743	0.0956081	0.923832	0.999811
AC125232.1	10.4121	0.694057	1.3605	0.510149	0.609947	0.999811
AC125238.2	12.7281	-0.263781	0.945735	-0.278917	0.780309	0.999811
AC126365.1	7.23013	-4.10352	1.94634	-2.10833	0.0350027	0.657849
ACAA1	21.5705	-0.161636	0.789	-0.204861	0.83768	0.999811
ACAA2	13.2615	0.56761	0.876153	0.647843	0.517087	0.999811
ACAD8	21.6227	-0.757374	1.23713	-0.612205	0.540402	0.999811
ACAD9	48.3831	0.339759	0.611587	0.555537	0.578527	0.999811
ACADM	36.8824	0.868164	1.25824	0.689983	0.490205	0.999811
ACADSB	7.02271	-0.790602	2.13909	-0.369597	0.711683	0.999811
ACADVL	11.9796	0.555963	1.04407	0.532494	0.594384	0.999811
ACAT1	79.4567	-0.127735	0.779508	-0.163867	0.869836	0.999811
ACAT2	183.309	1.22077	0.353361	3.45473	0.000550841	0.0889024
ACBD3	6.78575	0.47847	1.34116	0.356758	0.721273	0.999811
ACBD5	7.27393	0.306452	1.73827	0.176297	0.86006	0.999811
ACBD6	41.2969	0.775522	0.67992	1.14061	0.254033	0.999811
ACCS	12.4135	-1.11346	1.68261	-0.661747	0.508133	0.999811
ACKR3	9.09535	-0.57664	1.1278	-0.511294	0.609145	0.999811
ACLY	178.689	0.62763	0.728152	0.861949	0.388716	0.999811
ACO1	150.648	1.06093	0.275821	3.84645	0.000119844	0.0335941
ACOT8	12.243	-0.36804	1.37174	-0.268302	0.788467	0.999811
ACOT9	75.779	0.0742922	0.392839	0.189116	0.850002	0.999811
ACOX1	9.68135	-0.411392	1.01486	-0.40537	0.685206	0.999811
ACOX2	38.2041	-0.49121	1.31356	-0.373953	0.708439	0.999811
ACOX3	43.1288	0.0440009	0.731215	0.060175	0.952016	0.999811
ACP1	67.7996	-0.0920922	0.432794	-0.212786	0.831494	0.999811
ACP2	8.21887	-2.23095	1.52181	-1.46598	0.142653	0.999811
ACSF2	6.74846	-5.41333	1.98986	-2.72046	0.00651912	0.294244
ACSF3	23.8544	0.61688	1.0645	0.579504	0.562249	0.999811
ACSL1	50.3536	-0.0925837	0.659909	-0.140298	0.888425	0.999811
ACSL3	117.765	0.891624	0.396734	2.24741	0.0246138	0.560226
ACSL4	23.1579	2.59796	0.914973	2.83939	0.00452001	0.24612
ACSS2	13.7512	0.734181	1.18781	0.618098	0.53651	0.999811
ACTA2	85.6576	-1.202	0.473753	-2.53719	0.0111745	0.394142
ACTB	587.309	0.0227556	0.172104	0.13222	0.894811	0.999811
ACTG1	391.686	0.18481	0.203018	0.910312	0.362658	0.999811
ACTL6A	71.4468	0.3161	0.529212	0.597304	0.550305	0.999811
ACTN1	247.391	-0.570132	0.326554	-1.7459	0.0808282	0.958778
ACTN4	15.5933	-1.04112	0.916911	-1.13547	0.256179	0.999811
ACTR10	273.756	0.309289	0.207368	1.4915	0.13583	0.999811
ACTR1A	63.966	0.25281	0.425728	0.593829	0.552626	0.999811
ACTR1B	13.2015	0.130827	0.895454	0.146102	0.883841	0.999811
ACTR2	72.6061	0.0671173	0.532561	0.126028	0.89971	0.999811
ACTR3	48.1693	0.0094324	0.579877	0.0162662	0.987022	0.999811
ACTR3P2	33.0056	-0.10736	0.602721	-0.178125	0.858624	0.999811
ACTR6	36.1932	0.19808	0.683222	0.289921	0.771877	0.999811
ACTR8	19.9559	0.781519	1.24233	0.629077	0.529298	0.999811
ACVR1	35.4318	-1.25575	0.754983	-1.66328	0.0962571	0.999811
ACVR2A	8.85944	1.59765	1.6341	0.977695	0.328225	0.999811
ACYP2	15.0532	0.24884	0.972462	0.255886	0.798039	0.999811
ADA	33.8095	0.284371	1.29131	0.22022	0.8257	0.999811
ADAL	9.74288	2.27065	1.26109	1.80055	0.0717742	0.9193
ADAM10	30.4556	-0.232817	0.687888	-0.338452	0.735023	0.999811
ADAM12	65.8227	-1.00769	0.615335	-1.63762	0.101501	0.999811
ADAM17	19.6455	0.447921	1.34784	0.332324	0.739644	0.999811
ADAM9	144.552	0.303815	0.336278	0.903463	0.36628	0.999811
ADAMTS12	15.2755	-0.846486	0.869808	-0.973188	0.33046	0.999811
ADAMTSL1	45.0058	0.392623	0.733095	0.535569	0.592256	0.999811
ADAT1	10.715	0.272553	1.56611	0.174032	0.861841	0.999811
ADCK1	11.9286	1.22038	1.33153	0.916524	0.359392	0.999811
ADD1	32.0279	0.309525	0.708143	0.437093	0.662044	0.999811
ADD2	9.44083	2.68339	1.47371	1.82084	0.068631	0.907016
ADD3	28.3908	-0.886646	0.787747	-1.12555	0.260357	0.999811
ADGRE5	9.51349	1.00117	1.44021	0.695158	0.486956	0.999811
ADGRL4	31.5214	-0.271242	0.840538	-0.322701	0.746922	0.999811
ADH1A	25.7176	0.828525	0.756135	1.09574	0.273193	0.999811
ADH1B	136.078	0.810673	0.420813	1.92645	0.0540488	0.801849
ADH1C	34.8676	0.963048	0.684502	1.40693	0.159447	0.999811
ADH5	29.0388	0.0258672	0.604611	0.0427832	0.965874	0.999811
ADH5P4	65.4646	0.421935	0.457072	0.923126	0.355942	0.999811
ADI1	57.8081	0.456682	0.440894	1.03581	0.300291	0.999811
ADIPOR1	71.1427	-0.112547	0.427864	-0.263043	0.792517	0.999811
ADK	86.3061	-0.44495	0.418745	-1.06258	0.287973	0.999811
ADM	13.825	0.139505	0.891644	0.156458	0.875672	0.999811
ADPGK	13.4885	0.907391	1.14737	0.790843	0.429036	0.999811
ADPRHL2	9.94098	-1.11797	1.0937	-1.02219	0.30669	0.999811
ADPRM	7.69612	-0.245512	1.24618	-0.197012	0.843818	0.999811
ADRM1	27.1941	0.3537	0.640511	0.552216	0.5808	0.999811
ADSL	134.291	-0.0923066	0.460573	-0.200417	0.841155	0.999811
AEBP1	17.086	-0.796901	0.90237	-0.883119	0.377172	0.999811
AF196972.4	40.2712	0.277768	0.514857	0.539505	0.589538	0.999811
AFAP1	16.3165	-0.787719	1.12399	-0.700823	0.483413	0.999811
AFMID	23.8989	-0.786795	0.670027	-1.17427	0.240286	0.999811
AGA	42.5833	0.249575	1.27699	0.19544	0.845049	0.999811
AGO3	10.203	-6.00959	2.04161	-2.94355	0.00324472	0.221556
AGPAT4	23.0347	-0.150044	0.88814	-0.168942	0.865842	0.999811
AGPS	33.1222	-0.314134	0.873889	-0.359466	0.719246	0.999811
AGTRAP	51.121	-1.10803	0.767855	-1.44302	0.149016	0.999811
AHCY	22.0418	0.55185	0.70841	0.778997	0.435981	0.999811
AHCYL1	20.0569	0.563827	0.841635	0.669919	0.502909	0.999811
AHCYP4	7.45039	1.48899	1.24427	1.19668	0.231433	0.999811
AHNAK	59.0839	0.192825	0.506706	0.380545	0.703541	0.999811
AHSA1	88.9474	0.0146458	0.396818	0.036908	0.970558	0.999811
AIFM1	34.6174	0.305275	0.789947	0.386449	0.699164	0.999811
AIFM2	15.7411	1.42474	1.1717	1.21596	0.224	0.999811
AIG1	33.7263	0.993208	0.573092	1.73307	0.0830833	0.963578
AIMP1	61.8747	-0.0514153	0.452344	-0.113664	0.909504	0.999811
AIMP2	33.5245	-0.120474	0.563145	-0.21393	0.830602	0.999811
AIP	20.8217	0.0637629	0.701815	0.0908544	0.927608	0.999811
AK2	11.0726	0.453127	0.933077	0.485627	0.627232	0.999811
AK3	29.5678	-0.569637	0.728167	-0.782289	0.434045	0.999811
AK5	21.3293	1.09148	1.22796	0.888855	0.374081	0.999811
AK6	14.4958	-1.21322	0.909862	-1.33342	0.182396	0.999811
AK6P1	8.00299	-0.0750766	1.09776	-0.0683909	0.945474	0.999811
AKAP10	13.7214	0.496286	1.56126	0.317874	0.75058	0.999811
AKIP1	24.6233	0.131402	0.644574	0.203859	0.838464	0.999811
AKIRIN1	24.766	-0.17057	1.02518	-0.16638	0.867858	0.999811
AKIRIN2	11.5368	-0.472511	1.02846	-0.459434	0.645922	0.999811
AKR1A1	79.9924	-0.302008	0.433792	-0.696204	0.486301	0.999811
AKR1B1	26.4084	-0.140633	0.626083	-0.224624	0.822272	0.999811
AKR1B1P1	7.1497	-1.61865	1.27204	-1.27249	0.2032	0.999811
AKR1B1P3	38.5379	-0.302964	0.521064	-0.581433	0.560948	0.999811
AKR1B1P7	23.3574	-0.264564	0.683146	-0.387273	0.698554	0.999811
AKR1C1	116.415	0.797425	0.347147	2.29709	0.0216139	0.520884
AKR1C2	153.866	0.720556	0.310364	2.32165	0.0202518	0.504024
AKR1C3	174.284	0.137083	0.319588	0.428936	0.66797	0.999811
AKR1C4	27.835	0.638428	0.631038	1.01171	0.311676	0.999811
AKR7A2	40.2217	0.610221	0.50603	1.2059	0.227857	0.999811
AKR7A2P1	11.3186	0.34081	0.924463	0.368657	0.712383	0.999811
AKT2	26.7957	-1.10582	0.977202	-1.13162	0.257794	0.999811
AL121578.5	75.1966	0.80427	0.374364	2.14836	0.0316849	0.639331
AL590762.6	14.4437	-0.500204	0.96111	-0.520444	0.602754	0.999811
ALAD	12.5116	1.59244	1.02298	1.55667	0.119549	0.999811
ALAS1	48.1239	0.55122	0.674436	0.817305	0.413754	0.999811
ALCAM	11.2474	0.311533	1.73709	0.179341	0.85767	0.999811
ALDH18A1	150.146	0.923213	0.428533	2.15436	0.0312121	0.639331
ALDH1B1	9.8437	0.577837	1.04921	0.550736	0.581815	0.999811
ALDH1L2	25.7701	0.378998	0.877505	0.431903	0.665812	0.999811
ALDH2	56.2683	0.151537	0.592871	0.255599	0.79826	0.999811
ALDH3A2	29.0607	1.15702	1.06958	1.08176	0.27936	0.999811
ALDH3B1	8.45487	3.27477	1.48829	2.20036	0.0277812	0.60393
ALDH7A1P1	14.6223	-0.0809613	0.902929	-0.0896652	0.928553	0.999811
ALDH9A1	173.748	0.268522	0.308125	0.871471	0.383497	0.999811
ALDOA	459.666	0.195242	0.199938	0.97651	0.328812	0.999811
ALG1	14.2057	-1.03405	0.983198	-1.05172	0.292926	0.999811
ALG12	9.93947	-0.405303	1.17137	-0.346006	0.729338	0.999811
ALG13	19.7852	-0.282775	0.860331	-0.328681	0.742397	0.999811
ALG14	15.5083	-0.975677	0.850648	-1.14698	0.251389	0.999811
ALG2	6.80441	0.778331	1.39441	0.558178	0.576723	0.999811
ALG3	14.7014	-0.350724	0.971486	-0.361018	0.718086	0.999811
ALG5	163.728	-0.100815	0.341833	-0.294926	0.76805	0.999811
ALG6	21.3904	-0.582533	1.36051	-0.428171	0.668526	0.999811
ALG8	39.8814	0.405978	1.21228	0.334887	0.73771	0.999811
ALKBH1	8.46775	1.44532	1.44024	1.00353	0.315607	0.999811
ALKBH2	12.8721	1.09116	1.02213	1.06753	0.285732	0.999811
ALKBH3	28.9087	0.69354	0.862169	0.804412	0.421159	0.999811
AMACR	11.1313	0.830108	1.09143	0.760568	0.446915	0.999811
AMD1	20.5098	-0.238274	0.713375	-0.33401	0.738372	0.999811
AMFR	25.4826	0.150863	1.15176	0.130985	0.895787	0.999811
AMOTL1	10.9835	0.0349749	1.66052	0.0210626	0.983196	0.999811
AMPH	7.83226	-5.62777	1.9224	-2.92747	0.00341736	0.227511
AMZ2	77.7337	-0.12555	0.378054	-0.332095	0.739818	0.999811
AMZ2P1	20.6887	-0.297374	0.728781	-0.408043	0.683242	0.999811
ANAPC1	17.2444	-1.11607	1.31694	-0.847472	0.396732	0.999811
ANAPC11	12.6939	-0.435307	0.918617	-0.473872	0.635591	0.999811
ANAPC13	45.2288	0.351964	0.572776	0.614488	0.538893	0.999811
ANAPC16	51.0149	-0.322797	0.496188	-0.650554	0.515334	0.999811
ANAPC4	28.7727	-0.877797	1.27029	-0.691019	0.489554	0.999811
ANAPC5	246.145	-0.365979	0.442303	-0.827438	0.407989	0.999811
ANAPC7	28.8166	-2.41585	1.11676	-2.16325	0.0305217	0.637438
ANGEL2	9.82195	0.112011	1.05881	0.10579	0.915749	0.999811
ANGPT1	7.12479	1.76946	1.45087	1.21959	0.222621	0.999811
ANGPTL2	16.9927	0.361638	0.874284	0.413639	0.679139	0.999811
ANGPTL4	24.4551	0.252009	0.7286	0.345882	0.729432	0.999811
ANK3	7.50596	6.15558	2.56013	2.4044	0.0161989	0.467565
ANKH	8.29346	-3.42631	1.85956	-1.84254	0.0653966	0.894938
ANKLE2	9.79174	1.97594	1.37997	1.43187	0.152181	0.999811
ANKMY2	36.3171	0.224015	0.724078	0.30938	0.757033	0.999811
ANKRA2	27.718	-0.610206	1.34006	-0.455357	0.648852	0.999811
ANKRD13A	7.32045	3.17796	1.53327	2.07267	0.0382031	0.684145
ANKRD13C	22.6341	0.851111	1.24537	0.683422	0.49434	0.999811
ANKRD27	18.1844	-0.0429044	1.52976	-0.0280465	0.977625	0.999811
ANKRD42	8.71933	-1.56106	1.44094	-1.08337	0.278646	0.999811
ANO10	55.9824	0.0306179	0.623611	0.0490978	0.960841	0.999811
ANO6	7.08142	2.76033	1.91169	1.44392	0.148761	0.999811
ANP32AP1	7.41273	0.47242	1.24575	0.379225	0.704521	0.999811
ANP32BP1	21.1931	0.0897568	0.690556	0.129977	0.896584	0.999811
ANP32E	14.6685	-0.623346	1.02927	-0.605618	0.544769	0.999811
ANPEP	63.0861	-0.0151241	0.527225	-0.0286862	0.977115	0.999811
ANTXR1	15.2796	-0.308836	1.04747	-0.294841	0.768116	0.999811
ANTXR2	36.5185	-0.587768	0.606962	-0.968377	0.332856	0.999811
ANXA1	1541.75	0.171546	0.16299	1.05249	0.292573	0.999811
ANXA11	67.4208	-1.55014	0.528218	-2.93466	0.0033391	0.225115
ANXA2	985.626	-0.0984958	0.187729	-0.524669	0.599813	0.999811
ANXA2P1	9.25813	-0.271229	1.07431	-0.252467	0.80068	0.999811
ANXA2P2	1056.94	-0.0908593	0.182071	-0.499032	0.617757	0.999811
ANXA2P3	21.5287	-0.467329	0.842391	-0.554766	0.579055	0.999811
ANXA4	177.484	-0.0792339	0.388742	-0.203821	0.838493	0.999811
ANXA5	2474.56	-0.189276	0.140284	-1.34923	0.177262	0.999811
ANXA6	589.996	0.310248	0.182567	1.69937	0.0892498	0.994444
ANXA7	264.513	-0.0382906	0.341351	-0.112174	0.910686	0.999811
AOX1	29.1757	1.46992	1.21431	1.2105	0.226089	0.999811
AP1B1	9.72832	0.515884	2.06087	0.250323	0.802337	0.999811
AP1M1	74.1911	-0.628102	0.616552	-1.01873	0.30833	0.999811
AP1S1	117.91	0.346549	0.420048	0.825023	0.409359	0.999811
AP2A2	15.7275	1.4785	1.2225	1.20941	0.226507	0.999811
AP2M1	270.137	-0.0670219	0.209	-0.320679	0.748454	0.999811
AP2S1	61.4181	-0.730689	0.494193	-1.47855	0.139261	0.999811
AP3B1	43.9185	0.265831	1.13414	0.23439	0.814682	0.999811
AP3D1	8.75931	-2.47777	1.56941	-1.57879	0.114384	0.999811
AP3M1	29.4107	0.660526	0.838111	0.788113	0.430631	0.999811
AP3M2	11.3837	0.949659	1.95365	0.486094	0.626901	0.999811
AP3S1	27.6909	0.301271	0.636212	0.473539	0.635829	0.999811
AP5M1	11.0146	-0.0425308	1.49795	-0.0283926	0.977349	0.999811
APBB1	18.102	-0.248426	0.791502	-0.313866	0.753622	0.999811
APBB2	7.69328	-4.24291	2.25322	-1.88304	0.0596943	0.854656
APEH	17.4468	1.37811	0.902588	1.52685	0.126799	0.999811
APEX2	8.83322	-1.01423	1.65935	-0.611223	0.541052	0.999811
APH1A	16.3141	0.417593	0.779227	0.535906	0.592023	0.999811
APH1B	11.4016	0.0345888	1.50988	0.0229083	0.981723	0.999811
API5	10.9629	-0.254006	1.024	-0.248054	0.804093	0.999811
API5P1	8.55184	0.563627	1.07675	0.523454	0.600658	0.999811
APLF	7.03322	-0.554101	1.70628	-0.324742	0.745376	0.999811
APLP1	7.47247	-1.33074	2.32783	-0.571664	0.567549	0.999811
APLP2	132.849	0.631696	0.484609	1.30352	0.192399	0.999811
APMAP	96.7701	1.3153	0.696231	1.88917	0.0588688	0.845108
APOBEC3C	30.9301	0.33772	0.582346	0.579931	0.561961	0.999811
APOD	97.8273	-0.615931	0.427455	-1.44092	0.149606	0.999811
APOL1	11.4622	0.875734	1.34639	0.650432	0.515413	0.999811
APOL2	25.4971	0.625819	0.657275	0.952142	0.341025	0.999811
APOPT1	9.8437	0.0887385	1.04285	0.085092	0.932188	0.999811
APP	466.92	0.325224	0.234201	1.38865	0.164938	0.999811
APPBP2	9.06169	-2.31635	1.43327	-1.61613	0.106067	0.999811
APPL2	77.8029	1.05256	0.445772	2.36122	0.0182151	0.485068
APRT	28.2878	-0.305417	0.843895	-0.361913	0.717417	0.999811
APTX	44.514	-0.414107	0.547668	-0.756127	0.449573	0.999811
AQR	17.2444	1.285	1.94409	0.660977	0.508627	0.999811
ARAF	15.407	0.0880838	0.841379	0.10469	0.916622	0.999811
ARAP1	36.3284	-0.971682	0.640246	-1.51767	0.129097	0.999811
ARCN1	53.2469	0.0174543	0.447416	0.0390113	0.968881	0.999811
ARF1	126.172	-0.176488	0.317617	-0.555662	0.578442	0.999811
ARF4	106.965	-0.408101	0.450911	-0.90506	0.365433	0.999811
ARF4P1	58.4912	-0.362442	0.54484	-0.665226	0.505906	0.999811
ARF5	42.4811	-0.309333	0.512705	-0.603335	0.546286	0.999811
ARFGAP2	28.3644	0.791597	0.805197	0.983111	0.325553	0.999811
ARFGAP3	90.8668	0.00181834	0.540394	0.00336485	0.997315	0.999811
ARFGEF1	7.09811	1.61323	1.59998	1.00828	0.31332	0.999811
ARFIP1	44.5401	0.408329	0.700092	0.58325	0.559725	0.999811
ARFIP2	9.61109	0.052488	1.05424	0.0497875	0.960292	0.999811
ARFRP1	14.299	-0.685595	1.33657	-0.512952	0.607985	0.999811
ARGLU1	10.9572	-2.78144	1.31794	-2.11044	0.0348202	0.657633
ARHGAP1	23.2628	-1.31791	0.855755	-1.54006	0.123547	0.999811
ARHGAP10	26.1226	0.677271	1.33793	0.506208	0.612711	0.999811
ARHGAP12	7.00384	-1.75915	1.50194	-1.17126	0.241496	0.999811
ARHGAP17	33.6874	0.710929	0.785755	0.904772	0.365586	0.999811
ARHGAP18	23.8284	0.457947	1.26383	0.362348	0.717092	0.999811
ARHGAP24	25.2858	-2.19581	0.802518	-2.73616	0.00621616	0.285928
ARHGAP29	9.64898	1.16507	1.83832	0.633767	0.526233	0.999811
ARHGEF3	10.5421	-0.535801	1.93307	-0.277177	0.781644	0.999811
ARHGEF9	8.3232	0.768371	1.70698	0.450134	0.652614	0.999811
ARID5B	15.0149	-0.0551639	1.17871	-0.0468003	0.962672	0.999811
ARL1	97.0566	-1.05139	0.397689	-2.64374	0.00819963	0.331167
ARL14EP	19.638	-1.06693	0.770897	-1.38401	0.166356	0.999811
ARL2	41.0473	0.309626	0.514718	0.601544	0.547478	0.999811
ARL2BP	10.0763	0.400977	1.0111	0.396574	0.691682	0.999811
ARL3	19.1967	-0.584429	0.781394	-0.747931	0.454502	0.999811
ARL4D	25.7763	-0.0105733	0.635159	-0.0166467	0.986719	0.999811
ARL6IP1	20.8285	-1.36298	0.755029	-1.8052	0.0710438	0.917786
ARL6IP5	214.722	0.534297	0.247785	2.1563	0.0310604	0.638716
ARL6IP6	6.83598	-1.42954	1.30253	-1.09751	0.27242	0.999811
ARL8B	10.9629	-0.114712	0.943753	-0.121549	0.903256	0.999811
ARMC6	12.5579	0.118553	1.06641	0.11117	0.911481	0.999811
ARMC8	14.4434	-1.83246	1.20271	-1.52361	0.127606	0.999811
ARMC9	105.68	-0.646335	0.382243	-1.6909	0.0908562	0.999811
ARMCX1	19.7029	0.564614	0.738594	0.764444	0.444602	0.999811
ARMCX2	9.17449	-0.575946	1.06607	-0.540251	0.589024	0.999811
ARMCX3	17.6937	-0.385296	0.81908	-0.470401	0.638069	0.999811
ARMCX6	15.7831	-0.673813	0.863598	-0.780239	0.43525	0.999811
ARMT1	25.3277	-0.133765	0.699748	-0.191162	0.848399	0.999811
ARNT	33.3176	2.47551	0.764262	3.23908	0.00119914	0.130339
ARNTL	15.5798	-1.05462	1.27225	-0.828943	0.407137	0.999811
ARPC1A	13.3103	0.27425	0.960754	0.285453	0.775297	0.999811
ARPC1B	196.147	0.0130065	0.243945	0.0533172	0.957479	0.999811
ARPC2	528.895	0.10951	0.287931	0.380334	0.703698	0.999811
ARPC3	9.31171	-1.41428	1.11426	-1.26926	0.20435	0.999811
ARPC3P1	19.7674	-0.0415431	0.744674	-0.055787	0.955511	0.999811
ARPC4	20.1819	-0.00381666	0.725863	-0.0052581	0.995805	0.999811
ARPC5	197.595	0.0737065	0.242072	0.304482	0.76076	0.999811
ARPC5L	21.9849	-0.0804351	0.691865	-0.116258	0.907448	0.999811
ARPP19	16.8989	0.0466966	0.83121	0.056179	0.955199	0.999811
ARRB1	15.289	-0.21767	1.01456	-0.214547	0.83012	0.999811
ARRDC3	11.2034	0.286794	1.45884	0.19659	0.844148	0.999811
ARSK	10.7847	0.0699224	0.976084	0.0716356	0.942892	0.999811
ARV1	22.003	-1.02905	1.37221	-0.749924	0.4533	0.999811
ASAH1	116.396	0.0763445	0.56265	0.135687	0.892068	0.999811
ASAP1	12.7534	0.553362	1.02881	0.537867	0.590669	0.999811
ASAP3	12.7194	1.32005	1.28197	1.0297	0.30315	0.999811
ASB8	10.628	1.41736	1.10569	1.28188	0.199884	0.999811
ASCC1	41.8388	0.76624	0.54361	1.40954	0.158676	0.999811
ASCC2	72.34	0.168218	0.572488	0.293837	0.768882	0.999811
ASF1A	18.1201	-0.372457	0.906006	-0.411098	0.681001	0.999811
ASH2L	25.4892	-0.610953	0.727929	-0.839303	0.401299	0.999811
ASMTL	9.19043	-2.55143	1.51738	-1.68147	0.0926718	0.999811
ASNA1	69.8672	-0.82702	0.423241	-1.95402	0.0506991	0.776101
ASNS	168.246	0.0250165	0.303492	0.0824289	0.934306	0.999811
ASNSD1	25.5276	0.475126	0.626697	0.758143	0.448365	0.999811
ASNSP1	20.1715	0.00196015	0.771433	0.00254092	0.997973	0.999811
ASPA	8.35211	1.46048	1.4228	1.02648	0.304665	0.999811
ASPH	23.0019	1.57814	0.753645	2.09401	0.0362592	0.667108
ASPN	34.9574	-0.795598	0.673464	-1.18135	0.237463	0.999811
ASS1	10.8906	0.238683	1.03887	0.229753	0.818284	0.999811
ASS1P1	42.3784	-0.0614455	0.514999	-0.119312	0.905028	0.999811
ASS1P11	58.2021	0.026769	0.446181	0.0599959	0.952159	0.999811
ASS1P12	18.0373	-0.0798296	0.769583	-0.103731	0.917383	0.999811
ASS1P5	39.3154	-0.269095	0.558084	-0.482176	0.629681	0.999811
ASS1P9	32.8257	-0.30295	0.574312	-0.527501	0.597846	0.999811
ASTE1	10.043	-0.0127651	1.27149	-0.0100394	0.99199	0.999811
ASUN	50.8654	0.73876	0.584369	1.2642	0.206158	0.999811
ATAD1	36.2023	-0.181557	0.662014	-0.27425	0.783893	0.999811
ATE1	9.4699	0.0656644	1.51068	0.0434666	0.96533	0.999811
ATF1	9.83402	-1.65186	1.15674	-1.42803	0.153282	0.999811
ATF2	17.7339	-0.395155	0.819058	-0.482451	0.629486	0.999811
ATF4	69.9028	0.125646	0.428603	0.293153	0.769405	0.999811
ATF4P3	13.5405	0.301375	0.858121	0.351203	0.725436	0.999811
ATF5	7.17404	0.00930999	1.28734	0.00723197	0.99423	0.999811
ATF6	29.0829	1.2536	0.937369	1.33736	0.181104	0.999811
ATF6B	14.1951	1.0017	0.898712	1.11459	0.265025	0.999811
ATF7IP	15.8101	1.13743	1.21521	0.935996	0.349275	0.999811
ATG10	8.78622	-0.252748	1.22962	-0.20555	0.837142	0.999811
ATG101	13.2013	-0.732575	0.936191	-0.782506	0.433917	0.999811
ATG12	16.1791	0.037046	0.776588	0.0477035	0.961953	0.999811
ATG13	25.5235	0.103308	0.893228	0.115657	0.907924	0.999811
ATG16L1	8.38689	-5.73622	3.43963	-1.66769	0.0953782	0.999811
ATG3	69.5771	0.421805	0.58105	0.725936	0.467878	0.999811
ATG4A	13.653	-1.45349	1.28033	-1.13525	0.256272	0.999811
ATG4B	42.5428	-1.23021	0.76938	-1.59896	0.109828	0.999811
ATG4C	23.2905	-0.0486815	1.28751	-0.0378105	0.969839	0.999811
ATG5	11.5224	-0.874831	1.26638	-0.69081	0.489685	0.999811
ATG7	47.2106	-1.9732	1.18259	-1.66854	0.095208	0.999811
ATG9A	13.2729	0.570264	0.869155	0.656113	0.511751	0.999811
ATIC	141.18	0.0030327	0.360663	0.00840868	0.993291	0.999811
ATL1	14.9995	-0.402928	1.41631	-0.284491	0.776034	0.999811
ATL3	13.4222	0.679006	1.48364	0.457662	0.647195	0.999811
ATP10D	8.27544	1.87347	2.0976	0.893149	0.371778	0.999811
ATP1A1	68.7368	-0.819891	0.61007	-1.34393	0.178971	0.999811
ATP1B3	12.2537	-0.616782	0.929579	-0.663507	0.507006	0.999811
ATP1B3P1	11.8631	-0.541886	0.940698	-0.576047	0.564584	0.999811
ATP2A2	7.44581	2.17124	1.33307	1.62875	0.103366	0.999811
ATP2B1	8.87684	2.06726	1.52324	1.35715	0.174733	0.999811
ATP2C1	53.1811	-0.13533	0.627394	-0.215701	0.829221	0.999811
ATP5A1	111.961	0.140362	0.324671	0.43232	0.665509	0.999811
ATP5A1P10	19.6029	-0.244494	0.727061	-0.336277	0.736662	0.999811
ATP5A1P3	83.6312	0.235181	0.366476	0.641736	0.521044	0.999811
ATP5A1P5	17.725	-0.0729081	0.787318	-0.0926031	0.926219	0.999811
ATP5A1P7	23.9444	-0.132184	0.674013	-0.196115	0.84452	0.999811
ATP5A1P8	20.6736	-0.025812	0.737102	-0.0350183	0.972065	0.999811
ATP5B	111.134	-0.000621234	0.360874	-0.00172147	0.998626	0.999811
ATP5BP1	7.5191	-0.35068	1.16227	-0.301719	0.762866	0.999811
ATP5C1	39.4377	-0.34218	0.666516	-0.513386	0.607681	0.999811
ATP5C1P1	49.2993	-0.429893	0.607009	-0.708216	0.478811	0.999811
ATP5F1	95.9271	-0.334585	0.406444	-0.823201	0.410394	0.999811
ATP5F1P3	9.04916	0.443434	1.30078	0.340898	0.73318	0.999811
ATP5G2	9.31907	0.160627	1.14565	0.140206	0.888497	0.999811
ATP5G3	13.3062	-1.078	1.06215	-1.01492	0.310145	0.999811
ATP5L	9.88846	0.775263	1.01897	0.76083	0.446758	0.999811
ATP5LP2	8.52961	0.733199	1.06828	0.686333	0.492503	0.999811
ATP5S	8.39679	0.478199	1.28015	0.373549	0.70874	0.999811
ATP5SL	20.189	-0.0221496	0.724813	-0.030559	0.975621	0.999811
ATP6AP1	69.9644	-0.0840213	0.463075	-0.181442	0.85602	0.999811
ATP6AP2	107.633	0.49836	0.317667	1.56881	0.116692	0.999811
ATP6V0A1	12.239	-3.59451	1.45546	-2.46967	0.013524	0.432857
ATP6V0A2	8.08152	0.0444675	2.1958	0.0202512	0.983843	0.999811
ATP6V0B	34.866	-0.613768	0.636843	-0.963766	0.335163	0.999811
ATP6V0D1	80.6064	-0.477903	0.665889	-0.717692	0.472948	0.999811
ATP6V0E1	98.4593	0.116636	0.363079	0.321243	0.748027	0.999811
ATP6V0E1P2	9.81405	0.119806	1.12011	0.106959	0.914821	0.999811
ATP6V1A	20.6608	-0.0681004	0.909119	-0.0749081	0.940288	0.999811
ATP6V1B2	82.9396	-0.393348	0.586337	-0.670857	0.502312	0.999811
ATP6V1C1	27.5004	-0.742141	0.756199	-0.981409	0.326391	0.999811
ATP6V1D	94.9127	0.454651	0.431731	1.05309	0.2923	0.999811
ATP6V1E1	19.6792	-0.343766	0.780071	-0.440686	0.659441	0.999811
ATP6V1E1P1	12.5009	-0.0520184	1.04842	-0.049616	0.960428	0.999811
ATP6V1G1	107.005	-0.638517	0.393509	-1.62262	0.10467	0.999811
ATP6V1H	84.5031	0.781331	0.779611	1.00221	0.316244	0.999811
ATP9B	13.1099	-1.56203	1.3837	-1.12888	0.258948	0.999811
ATPAF1	27.5653	-2.61757	0.823063	-3.18028	0.00147132	0.145116
ATPAF2	18.2948	-0.885543	0.913983	-0.968884	0.332603	0.999811
ATRAID	111.537	-0.824646	0.381032	-2.16424	0.0304459	0.637438
ATRX	9.44148	-0.816062	1.84606	-0.442056	0.658449	0.999811
ATXN10	127.413	0.325646	0.329867	0.987206	0.323542	0.999811
ATXN3	10.9663	-2.1876	1.52477	-1.43471	0.15137	0.999811
AVL9	9.49089	-0.917926	1.58184	-0.580291	0.561718	0.999811
AXL	23.5805	-0.75256	0.848185	-0.887259	0.374939	0.999811
AZI2	65.1923	-0.0876819	0.471955	-0.185784	0.852614	0.999811
AZIN1	38.6004	-0.506694	0.820187	-0.617778	0.536721	0.999811
B2M	1172.11	-0.225383	0.203614	-1.10691	0.268332	0.999811
B3GNTL1	7.2493	-5.53557	1.90561	-2.90488	0.00367396	0.234866
B4GALT1	19.9837	-0.520887	0.831015	-0.626808	0.530785	0.999811
B4GALT3	7.67272	-0.0194543	1.35231	-0.014386	0.988522	0.999811
B4GALT4	29.7021	0.814586	0.783253	1.04	0.298339	0.999811
B4GALT7	8.79148	-0.515194	1.25743	-0.40972	0.682012	0.999811
B9D1	10.0881	-1.21534	1.36459	-0.890631	0.373127	0.999811
BABAM1	13.5431	0.653293	0.882002	0.740693	0.45888	0.999811
BACE2	11.3997	0.25087	1.02128	0.245643	0.805959	0.999811
BAG1	17.3076	0.999979	0.871697	1.14716	0.251314	0.999811
BAG2	12.6407	-1.00577	0.998371	-1.00741	0.313739	0.999811
BAG3	19.7979	1.1088	0.805181	1.37709	0.168485	0.999811
BANF1	6.95304	-0.913419	1.22304	-0.746845	0.455157	0.999811
BANK1	8.38689	-5.73622	3.43963	-1.66769	0.0953782	0.999811
BASP1	7.50339	-0.712857	1.17165	-0.608421	0.542908	0.999811
BAX	47.3093	0.310765	0.622184	0.499475	0.617445	0.999811
BAZ1B	7.07565	4.44765	2.58783	1.71868	0.085673	0.964682
BAZ2B	8.66811	3.06282	1.88117	1.62815	0.103493	0.999811
BBS2	64.4903	-0.38896	0.533685	-0.728819	0.466113	0.999811
BBS4	37.0103	0.485818	0.702245	0.691807	0.489059	0.999811
BBS7	16.6607	-1.66182	1.29923	-1.27907	0.200871	0.999811
BBS9	30.2193	0.864316	1.55101	0.557259	0.57735	0.999811
BCAP29	85.8635	-0.652962	0.514857	-1.26824	0.204712	0.999811
BCAP31	233.866	0.103121	0.381063	0.270613	0.786688	0.999811
BCAP31P1	30.3837	0.182673	0.698647	0.261466	0.793733	0.999811
BCAP31P2	39.272	-0.0453862	0.638481	-0.0710847	0.94333	0.999811
BCAR3	19.7004	-0.726511	1.06136	-0.684509	0.493654	0.999811
BCAS2	26.0221	-1.45915	0.797395	-1.82989	0.0672662	0.902417
BCAS3	31.2122	1.13565	0.716533	1.58492	0.112985	0.999811
BCAT1	16.2738	-0.276196	1.00326	-0.275299	0.783087	0.999811
BCAT2	9.02045	-1.61561	1.37076	-1.17862	0.238551	0.999811
BCCIP	87.5487	0.500541	0.57243	0.874416	0.381892	0.999811
BCKDHB	26.9914	-0.469319	0.864423	-0.542928	0.587179	0.999811
BCKDK	8.0422	1.1944	1.18292	1.00971	0.312636	0.999811
BCL10	13.1408	-0.789028	1.08927	-0.724364	0.468842	0.999811
BCL2L1	10.8052	0.604013	0.954448	0.63284	0.526838	0.999811
BCL2L13	15.075	0.938509	1.06321	0.882714	0.377391	0.999811
BCL7B	13.7762	-0.600129	0.979302	-0.612813	0.54	0.999811
BDH2P1	11.5652	0.54883	0.978982	0.560613	0.575062	0.999811
BECN1	73.822	-1.06363	0.502297	-2.11752	0.0342153	0.653157
BEND6	12.0104	-1.51435	1.30274	-1.16243	0.24506	0.999811
BET1	22.3103	0.283324	0.669528	0.42317	0.672171	0.999811
BEX3	17.7611	-0.94922	1.06223	-0.89361	0.371531	0.999811
BEX4	21.1485	-1.01596	0.809429	-1.25516	0.209421	0.999811
BFAR	46.8394	0.0747399	0.725234	0.103056	0.917918	0.999811
BGN	145.378	-1.21857	0.309446	-3.93791	8.21942e-05	0.025751
BHLHE40	30.646	-0.0884539	0.594032	-0.148904	0.881629	0.999811
BHMT2	9.03816	-0.224126	1.46656	-0.152824	0.878537	0.999811
BICC1	7.48796	-2.50013	1.57838	-1.58399	0.113197	0.999811
BID	17.7857	-1.1251	0.839428	-1.34032	0.180141	0.999811
BIN1	28.0999	1.72063	1.32457	1.29901	0.193941	0.999811
BIN3	18.0221	-0.21069	0.773859	-0.272259	0.785423	0.999811
BIRC2	15.4307	-1.77939	1.1881	-1.49767	0.134219	0.999811
BLCAP	17.4821	0.313838	0.838234	0.374404	0.708104	0.999811
BLMH	24.2799	-1.09194	1.36977	-0.797172	0.425351	0.999811
BLOC1S2	95.155	0.152138	0.439177	0.346416	0.72903	0.999811
BLOC1S6	10.1688	1.23743	1.13408	1.09113	0.275214	0.999811
BLVRA	79.4574	0.061091	0.381498	0.160135	0.872775	0.999811
BLVRB	26.9662	-0.223248	0.946739	-0.235807	0.813582	0.999811
BLZF1	24.2008	-0.521139	0.718325	-0.725492	0.46815	0.999811
BMP1	37.1131	0.130017	0.898682	0.144675	0.884967	0.999811
BMPER	12.4121	0.201838	1.04757	0.192672	0.847216	0.999811
BMPR2	8.72459	1.11654	1.95797	0.570252	0.568507	0.999811
BMS1	32.6321	-0.0271506	0.993471	-0.027329	0.978197	0.999811
BMT2	7.17535	-0.793228	1.50513	-0.527017	0.598181	0.999811
BNIP1	10.8003	0.187481	1.4619	0.128245	0.897955	0.999811
BNIP2	43.3494	-1.47097	0.82469	-1.78367	0.0744779	0.936168
BNIP3L	120.472	-0.325094	0.307754	-1.05634	0.290811	0.999811
BNIP3P1	18.6309	-0.45621	0.742115	-0.614743	0.538725	0.999811
BOC	11.9835	-0.695806	1.03719	-0.670854	0.502314	0.999811
BOD1	11.0971	-0.264887	1.01386	-0.261266	0.793888	0.999811
BOD1L1	6.8208	2.65664	2.72337	0.975496	0.329314	0.999811
BPGM	17.2971	0.42263	0.77717	0.543806	0.586575	0.999811
BPHL	9.00433	-5.83957	1.92433	-3.03459	0.00240862	0.196192
BPNT1	7.84513	1.00348	2.0372	0.492578	0.622311	0.999811
BRAP	22.403	-0.108879	0.901004	-0.120842	0.903816	0.999811
BRD8	25.4985	0.826606	0.743318	1.11205	0.266117	0.999811
BRD9	8.49138	-0.605939	2.01814	-0.300247	0.763989	0.999811
BRE	96.3633	0.364494	0.378264	0.963596	0.335249	0.999811
BRIX1	20.581	-0.687737	0.887346	-0.775049	0.438311	0.999811
BRK1	81.8468	-0.402405	0.459631	-0.875495	0.381304	0.999811
BRMS1	20.3144	0.770234	0.741903	1.03819	0.299183	0.999811
BRMS1L	24.3551	0.676558	1.47197	0.459627	0.645784	0.999811
BROX	28.9446	1.86167	1.37825	1.35075	0.176776	0.999811
BSDC1	34.9612	0.347803	0.783198	0.44408	0.656984	0.999811
BSG	266.688	-0.0735094	0.314223	-0.23394	0.815031	0.999811
BST1	37.0971	1.38463	0.760786	1.82	0.068759	0.907016
BTBD1	18.263	0.317734	0.792675	0.400838	0.68854	0.999811
BTBD10	17.9458	-0.875191	1.08529	-0.806416	0.420003	0.999811
BTD	12.5894	-0.165716	0.978406	-0.169374	0.865503	0.999811
BTF3	64.0875	-0.269863	0.422433	-0.638831	0.522933	0.999811
BTF3L4	15.4544	0.26465	0.813763	0.325218	0.745016	0.999811
BTF3L4P2	18.0125	-0.153848	0.765603	-0.20095	0.840738	0.999811
BTF3P10	13.8887	0.466381	0.904937	0.515374	0.606292	0.999811
BTF3P12	11.3879	0.0130308	1.04189	0.0125068	0.990021	0.999811
BTF3P4	36.5689	-0.473264	0.581984	-0.813191	0.416108	0.999811
BTF3P5	102.826	-0.194179	0.335285	-0.579147	0.56249	0.999811
BTG3	16.4111	-0.205954	0.974518	-0.211339	0.832623	0.999811
BTN3A1	11.4674	-0.82336	1.11805	-0.736427	0.461471	0.999811
BTN3A2	6.78722	-1.92414	1.46691	-1.31169	0.189624	0.999811
BTN3A3	17.8692	-0.012769	0.864183	-0.0147758	0.988211	0.999811
BTRC	8.63286	1.07684	2.11067	0.51019	0.609919	0.999811
BUB3	52.45	-0.119018	0.552305	-0.215493	0.829383	0.999811
BUB3P1	23.1719	0.172292	0.691065	0.249314	0.803118	0.999811
BUD31	83.4663	-0.283039	0.385474	-0.734262	0.462789	0.999811
BYSL	6.90304	0.00643806	1.42988	0.00450252	0.996408	0.999811
BZW1	39.2886	-0.386494	0.565947	-0.682915	0.49466	0.999811
BZW1P2	29.9966	-0.192881	0.667956	-0.288763	0.772763	0.999811
BZW2	51.5994	0.11608	0.733097	0.158342	0.874187	0.999811
C10orf54	9.20805	-5.85526	1.94204	-3.01501	0.00256972	0.196192
C10orf76	10.414	2.88576	1.89193	1.5253	0.127184	0.999811
C11orf24	22.9875	0.114037	0.927522	0.122948	0.902148	0.999811
C11orf49	65.7361	0.0404593	0.504396	0.0802133	0.936068	0.999811
C11orf54	29.8977	-0.744659	1.2572	-0.592314	0.55364	0.999811
C11orf58	71.7906	0.00353801	0.454421	0.00778576	0.993788	0.999811
C11orf70	10.0929	0.737874	1.07995	0.683248	0.49445	0.999811
C12orf10	19.6233	-0.742629	0.772023	-0.961926	0.336087	0.999811
C12orf29	27.4438	0.651966	0.753723	0.864994	0.387042	0.999811
C12orf4	19.9702	0.690058	1.30206	0.529972	0.596131	0.999811
C12orf65	10.1399	-0.706237	1.18263	-0.597173	0.550392	0.999811
C12orf75	22.9714	-0.332363	0.910775	-0.364923	0.715169	0.999811
C14orf1	65.1523	0.681936	0.402801	1.69299	0.0904581	0.999811
C14orf119	25.8491	0.304073	0.670217	0.453694	0.650049	0.999811
C14orf159	56.969	-0.16366	0.545576	-0.299977	0.764195	0.999811
C14orf166	83.5434	0.124032	0.404788	0.306411	0.759291	0.999811
C15orf40	12.1753	-0.646239	0.937708	-0.689169	0.490717	0.999811
C16orf45	24.5969	-0.379883	0.664242	-0.571905	0.567387	0.999811
C16orf62	147.499	0.254229	0.65175	0.390071	0.696484	0.999811
C17orf62	17.5339	-0.0209017	0.777058	-0.0268985	0.978541	0.999811
C17orf75	15.7306	-0.69343	1.3192	-0.525642	0.599137	0.999811
C18orf8	18.1059	0.489619	0.924828	0.529416	0.596517	0.999811
C19orf24	8.97448	-0.506163	1.06361	-0.475891	0.634152	0.999811
C19orf43	19.9984	0.739167	0.759854	0.972775	0.330665	0.999811
C19orf48	9.39819	0.0136141	1.06456	0.0127885	0.989797	0.999811
C1D	12.6598	0.125433	0.904222	0.138719	0.889672	0.999811
C1GALT1	15.8063	0.180256	0.945498	0.190647	0.848802	0.999811
C1orf123	23.4297	-1.54472	0.745576	-2.07185	0.0382792	0.684145
C1orf131	30.8309	0.116869	0.682019	0.171357	0.863943	0.999811
C1orf174	15.5993	-0.416249	0.944076	-0.440906	0.659281	0.999811
C1orf198	14.5814	-0.0999794	0.882961	-0.113232	0.909847	0.999811
C1orf21	12.3805	-2.64083	1.3325	-1.98187	0.0474939	0.74852
C1orf27	31.4673	0.460028	0.633066	0.726666	0.46743	0.999811
C1orf43	111.278	0.109907	0.338773	0.324428	0.745614	0.999811
C1orf52	18.2339	0.282328	0.953095	0.296222	0.76706	0.999811
C1QBP	37.7113	0.089691	0.539566	0.166228	0.867978	0.999811
C1R	159.052	0.128124	0.348662	0.367472	0.713267	0.999811
C1S	723.056	-0.0235492	0.216758	-0.108643	0.913486	0.999811
C20orf194	12.3187	-0.231727	0.965327	-0.24005	0.810291	0.999811
C20orf24	9.49805	-0.652385	1.09311	-0.596818	0.550629	0.999811
C20orf27	18.3755	0.911068	0.857181	1.06287	0.287843	0.999811
C21orf33	89.0935	-0.346735	0.450573	-0.769543	0.441571	0.999811
C21orf59	7.28649	-0.0916883	1.22432	-0.074889	0.940303	0.999811
C2CD5	17.3644	-0.455736	1.10506	-0.412409	0.68004	0.999811
C2orf42	9.45061	0.797655	1.39849	0.570371	0.568426	0.999811
C3orf14	14.3325	-0.0494201	1.67164	-0.0295638	0.976415	0.999811
C3orf33	7.56632	-1.57472	1.50532	-1.0461	0.295515	0.999811
C3orf38	15.3881	0.809029	1.21621	0.665204	0.50592	0.999811
C4orf3	32.336	-0.158454	0.602912	-0.262815	0.792693	0.999811
C4orf33	7.08323	-0.376616	1.46234	-0.257543	0.79676	0.999811
C5orf15	43.4187	-0.248005	0.542532	-0.457125	0.647581	0.999811
C5orf22	22.3252	0.909332	1.05289	0.863655	0.387777	0.999811
C6orf1	8.65599	0.0705778	1.03954	0.0678933	0.945871	0.999811
C6orf203	19.1149	-1.02919	0.851334	-1.20891	0.226696	0.999811
C6orf48	22.9465	0.299905	0.733391	0.408928	0.682592	0.999811
C6orf62	15.0819	0.5422	0.869118	0.62385	0.532726	0.999811
C6orf89	32.5696	-0.225505	0.633652	-0.355882	0.721929	0.999811
C7orf50	21.5374	0.357637	0.747256	0.478601	0.632223	0.999811
C7orf73	28.0493	-0.024996	0.62358	-0.0400847	0.968026	0.999811
C8orf76	9.38254	-0.106858	1.05153	-0.101622	0.919057	0.999811
C9orf3	8.51251	-0.777147	2.05911	-0.377418	0.705863	0.999811
C9orf64	6.79477	0.617456	1.85315	0.333193	0.738988	0.999811
C9orf78	57.3698	0.000105167	0.443644	0.000237052	0.999811	0.999811
CA5B	8.53661	-0.61197	1.27192	-0.481139	0.630418	0.999811
CAB39L	12.5116	0.464697	1.87234	0.24819	0.803987	0.999811
CACYBPP2	21.4204	0.205636	0.726397	0.28309	0.777108	0.999811
CALCOCO1	46.2283	0.0834543	0.521594	0.159999	0.872882	0.999811
CALCOCO2	142.755	0.42708	0.409856	1.04202	0.297401	0.999811
CALD1	274.426	0.661919	0.237474	2.78733	0.00531447	0.262082
CALHM2	11.8019	-0.326921	0.984224	-0.332161	0.739768	0.999811
CALM1	106.836	-0.261606	0.351106	-0.745093	0.456216	0.999811
CALM1P1	7.41822	-0.311971	1.17767	-0.264905	0.791083	0.999811
CALM2	250.107	-0.310035	0.256409	-1.20914	0.226608	0.999811
CALM2P2	22.8134	-0.564895	0.7513	-0.751891	0.452117	0.999811
CALM2P3	45.8371	-0.173913	0.526996	-0.330009	0.741393	0.999811
CALM3	10.6903	0.238734	0.959047	0.248928	0.803416	0.999811
CALR	15.945	0.0805137	0.800624	0.100564	0.919897	0.999811
CALU	424.408	0.189327	0.222053	0.852623	0.393869	0.999811
CAMK2D	30.6963	-0.850056	1.00406	-0.846623	0.397205	0.999811
CAMK2G	7.01416	0.409364	2.85492	0.143389	0.885983	0.999811
CAMKMT	7.02765	1.64111	1.66152	0.987718	0.323291	0.999811
CAMLG	45.4957	0.475284	0.67296	0.706259	0.480027	0.999811
CAMTA1	14.5876	0.888912	0.945331	0.940318	0.347054	0.999811
CAND1	30.9808	-0.0332737	0.945867	-0.0351779	0.971938	0.999811
CANX	323.06	0.350943	0.360151	0.974433	0.329841	0.999811
CAP1	174.255	0.285496	0.327473	0.871813	0.383311	0.999811
CAPG	80.9624	-0.0152231	0.443378	-0.0343343	0.972611	0.999811
CAPN1	49.9125	0.591889	0.64237	0.921414	0.356835	0.999811
CAPN2	391.035	-0.148829	0.268462	-0.554375	0.579322	0.999811
CAPN5	7.33116	-1.30748	1.643	-0.795789	0.426155	0.999811
CAPN7	10.5093	4.45833	1.5857	2.81158	0.00492983	0.254915
CAPNS1	32.3193	-0.270161	0.588	-0.459457	0.645906	0.999811
CAPRIN1	41.8115	1.5359	0.797879	1.92498	0.0542316	0.802326
CAPZA1	144.061	0.116943	0.409143	0.285824	0.775013	0.999811
CAPZA2	68.2302	-0.445496	0.495519	-0.899049	0.368627	0.999811
CAPZB	97.8892	-0.110375	0.362653	-0.304354	0.760858	0.999811
CARD19	12.0508	-0.951454	1.37757	-0.690674	0.489771	0.999811
CARF	9.06334	1.18048	2.30168	0.512878	0.608037	0.999811
CARHSP1	19.9114	0.347384	0.819074	0.424118	0.671479	0.999811
CARS	141.622	-0.259133	0.377212	-0.686969	0.492102	0.999811
CARS2	17.823	0.462143	1.4261	0.32406	0.745892	0.999811
CASC4	8.83392	-1.21384	1.23259	-0.984784	0.32473	0.999811
CASP1	10.5453	-0.335964	1.06213	-0.31631	0.751767	0.999811
CASP3	12.5313	-0.714295	0.973476	-0.733757	0.463097	0.999811
CASP4	130.928	-0.647434	0.316357	-2.04653	0.0407045	0.704957
CASP6	19.6855	1.01624	0.852287	1.19237	0.233117	0.999811
CASP7	22.8528	0.209749	0.82061	0.255601	0.798259	0.999811
CASP8	13.8918	1.30267	1.27291	1.02338	0.306128	0.999811
CASP9	17.3289	1.10418	1.31748	0.838101	0.401974	0.999811
CAST	255.554	0.615328	0.377496	1.63003	0.103096	0.999811
CAT	142.95	0.160024	0.334276	0.478719	0.632138	0.999811
CAV1	158.853	0.287253	0.436959	0.657392	0.510929	0.999811
CAV2	25.3377	0.0296817	0.662853	0.0447787	0.964284	0.999811
CBLB	12.8251	1.14874	1.41786	0.810194	0.417829	0.999811
CBLL1	6.94354	-0.227008	1.71258	-0.132553	0.894547	0.999811
CBR1	18.0454	0.271219	0.82273	0.329658	0.741659	0.999811
CBR4	7.74148	-5.62397	1.90888	-2.94621	0.00321691	0.221556
CBS	78.8373	-0.657887	0.594272	-1.10705	0.268273	0.999811
CBSL	79.202	-0.633517	0.557266	-1.13683	0.255609	0.999811
CBWD1	74.1117	-0.238238	0.494714	-0.481566	0.630114	0.999811
CBWD2	96.3844	-0.0428455	0.434041	-0.0987131	0.921366	0.999811
CBWD3	59.1467	-0.454886	0.538866	-0.844156	0.398582	0.999811
CBWD4P	23.5353	-0.395212	0.721014	-0.548134	0.5836	0.999811
CBWD5	46.7415	-0.364551	0.547912	-0.665345	0.50583	0.999811
CBWD7	47.6143	-0.0755691	0.483111	-0.156422	0.875701	0.999811
CBX1	15.5953	0.223343	0.900755	0.247951	0.804172	0.999811
CBX3	55.8681	0.0806909	0.563318	0.143242	0.886099	0.999811
CBX3P5	20.6104	-0.137383	0.769565	-0.178521	0.858314	0.999811
CBX5	11.8238	-0.263332	1.2088	-0.217846	0.827549	0.999811
CBY1	15.1478	-0.33228	1.35979	-0.244361	0.806951	0.999811
CC2D2A	13.1866	1.26252	1.39444	0.905396	0.365256	0.999811
CCAR1	21.8408	-0.0248046	1.33483	-0.0185826	0.985174	0.999811
CCDC115	40.1569	0.130639	0.545274	0.239583	0.810653	0.999811
CCDC12	18.0403	-0.771219	0.786421	-0.980669	0.326756	0.999811
CCDC124	13.0889	-0.394302	1.22462	-0.321979	0.747469	0.999811
CCDC127	8.91484	-0.0225062	1.07416	-0.0209525	0.983284	0.999811
CCDC149	7.81015	1.58633	1.40359	1.1302	0.258393	0.999811
CCDC159	9.51952	-0.0580246	1.1213	-0.0517475	0.95873	0.999811
CCDC174	10.2366	1.38307	1.32544	1.04348	0.296728	0.999811
CCDC25	20.2956	0.416797	0.809528	0.514864	0.606648	0.999811
CCDC28A	22.3626	-0.59009	0.753034	-0.783617	0.433265	0.999811
CCDC34	8.45454	0.505105	1.60255	0.315189	0.752618	0.999811
CCDC47	59.237	0.210096	0.501104	0.419266	0.675022	0.999811
CCDC50	34.8659	-0.630647	0.647573	-0.973862	0.330125	0.999811
CCDC53	51.488	-0.73421	0.501073	-1.46528	0.142846	0.999811
CCDC6	10.7882	0.294811	1.17302	0.251325	0.801563	0.999811
CCDC74A	10.9616	0.927791	0.954511	0.972007	0.331047	0.999811
CCDC80	466.899	0.0533119	0.206297	0.258422	0.796081	0.999811
CCDC82	10.8852	-0.270739	1.94963	-0.138867	0.889556	0.999811
CCDC88C	28.1666	-0.240664	0.620937	-0.387582	0.698325	0.999811
CCDC90B	59.3978	-0.211614	0.56388	-0.375282	0.70745	0.999811
CCDC91	12.7877	1.51535	1.24912	1.21314	0.225077	0.999811
CCL2	9.15099	-0.448504	1.14749	-0.390856	0.695904	0.999811
CCM2	16.7895	1.19521	1.42333	0.839726	0.401062	0.999811
CCNB1IP1	10.6456	-0.359315	1.0885	-0.3301	0.741325	0.999811
CCNC	31.0477	0.0166442	0.623819	0.0266812	0.978714	0.999811
CCNDBP1	33.837	-2.04661	1.02726	-1.9923	0.0463379	0.746088
CCNG1	130.219	0.391272	0.319904	1.22309	0.221295	0.999811
CCNG2	16.0562	1.14835	1.31962	0.870217	0.384182	0.999811
CCNH	62.1454	-0.839691	0.532465	-1.57699	0.114798	0.999811
CCNI	34.449	0.470129	0.571281	0.822938	0.410543	0.999811
CCNL1	11.1834	0.872575	1.053	0.828653	0.407301	0.999811
CCNL2	10.4739	-0.512137	1.16007	-0.44147	0.658873	0.999811
CCNY	9.78718	0.328169	1.68654	0.194581	0.845721	0.999811
CCPG1	13.4379	-0.866043	0.891524	-0.971418	0.33134	0.999811
CCS	11.2975	0.855402	1.19443	0.71616	0.473893	0.999811
CCSER2	8.38566	-2.79551	1.44257	-1.93787	0.0526391	0.785311
CCT2	181.789	-0.125782	0.275375	-0.456766	0.647839	0.999811
CCT3	413.149	-0.464882	0.223862	-2.07664	0.0378346	0.683075
CCT4	163.534	-0.113472	0.356364	-0.318415	0.75017	0.999811
CCT5	9.70368	-0.242373	1.12381	-0.215672	0.829244	0.999811
CCT5P1	14.3835	0.0377443	0.844211	0.0447096	0.964339	0.999811
CCT5P2	42.1899	-0.250936	0.522962	-0.479835	0.631344	0.999811
CCT6A	39.2874	0.270022	0.521391	0.517887	0.604537	0.999811
CCT6P2	27.788	0.3826	0.603091	0.634398	0.525821	0.999811
CCT7	47.0174	-0.565871	0.5001	-1.13152	0.257838	0.999811
CCT7P1	35.6544	-0.000462928	0.554605	-0.0008347	0.999334	0.999811
CCT7P2	7.89094	-0.35191	1.23027	-0.286043	0.774845	0.999811
CCZ1	85.3072	-0.540314	0.520315	-1.03844	0.299066	0.999811
CCZ1B	85.6099	-0.312067	0.49048	-0.636249	0.524614	0.999811
CD109	38.5495	1.75837	3.46273	0.507798	0.611595	0.999811
CD151	32.7669	0.357313	0.587443	0.608252	0.54302	0.999811
CD164	139.137	0.204112	0.335724	0.607976	0.543203	0.999811
CD248	32.3301	-0.592899	0.581426	-1.01973	0.307856	0.999811
CD276	35.4922	0.0297784	0.641652	0.046409	0.962984	0.999811
CD320	10.167	-1.07634	1.382	-0.778825	0.436083	0.999811
CD36	12.4147	2.52441	1.26478	1.99594	0.0459408	0.745978
CD40	8.55479	-0.388635	1.49697	-0.259614	0.795162	0.999811
CD44	272.242	0.446754	0.255668	1.7474	0.0805683	0.958778
CD46	53.0323	0.667705	0.556798	1.19919	0.230455	0.999811
CD47	74.1266	0.318725	0.486902	0.654597	0.512727	0.999811
CD55	27.1464	-0.0589124	0.96675	-0.0609387	0.951408	0.999811
CD58	22.1361	-1.70844	0.792094	-2.15687	0.0310161	0.638716
CD59	123.688	0.14301	0.45583	0.313734	0.753723	0.999811
CD63	212.698	-0.0859812	0.234855	-0.366103	0.714288	0.999811
CD81	32.1166	0.301168	0.796587	0.378073	0.705377	0.999811
CD9	41.8412	1.00274	0.672301	1.4915	0.13583	0.999811
CD99	695.502	-0.0940181	0.160331	-0.5864	0.557607	0.999811
CD99L2	56.0384	-0.65545	1.05507	-0.621236	0.534444	0.999811
CDC123	194.267	0.280602	0.3767	0.744894	0.456336	0.999811
CDC16	76.8521	-0.312218	0.65741	-0.47492	0.634844	0.999811
CDC23	27.0685	-0.871747	0.946065	-0.921445	0.356818	0.999811
CDC37	24.5563	0.109743	0.645951	0.169894	0.865093	0.999811
CDC37L1	31.9419	1.23531	0.599677	2.05995	0.0394029	0.6949
CDC40	21.04	1.17003	1.50043	0.779795	0.435512	0.999811
CDC42	30.7378	-0.210709	0.643133	-0.327628	0.743193	0.999811
CDC42EP1	6.89191	-0.109218	1.32557	-0.0823935	0.934334	0.999811
CDC42EP3	6.79255	0.980797	1.25664	0.78049	0.435102	0.999811
CDC42P6	41.6771	-0.170103	0.568257	-0.299341	0.76468	0.999811
CDC5L	50.3682	0.234289	0.653232	0.358661	0.719849	0.999811
CDC73	11.8692	-2.24088	1.4117	-1.58737	0.11243	0.999811
CDCA7L	12.8587	0.868548	1.5411	0.56359	0.573033	0.999811
CDH11	231.34	-0.636465	0.316606	-2.01028	0.0444017	0.732147
CDH13	172.204	0.612829	0.255694	2.39673	0.0165421	0.471139
CDH2	144.412	0.367419	0.327122	1.12319	0.261358	0.999811
CDIPT	9.66541	-0.772242	1.09371	-0.706079	0.480139	0.999811
CDK10	21.3884	0.866196	1.26038	0.687253	0.491924	0.999811
CDK16	11.5984	-2.16946	1.17424	-1.84755	0.0646678	0.892282
CDK17	12.1978	0.265622	1.64097	0.161869	0.871409	0.999811
CDK4	30.1913	-0.782199	0.626826	-1.24787	0.212078	0.999811
CDK5RAP1	36.9692	-0.222441	0.855545	-0.259999	0.794865	0.999811
CDK5RAP2	12.955	-0.0934089	1.11445	-0.083816	0.933203	0.999811
CDK7P1	7.0461	0.485077	1.15916	0.418474	0.675601	0.999811
CDK9	8.71406	0.0371358	1.26661	0.029319	0.97661	0.999811
CDKAL1	19.0971	1.92817	1.4476	1.33197	0.182869	0.999811
CDKN1A	347.457	0.60239	0.227542	2.64738	0.00811189	0.331167
CDS2	29.9022	-1.83853	1.12054	-1.64076	0.100848	0.999811
CDYL	9.61707	0.342461	1.65256	0.207231	0.83583	0.999811
CEBPZ	29.5944	-0.27496	0.696305	-0.394884	0.692929	0.999811
CECR5	8.93333	-0.667146	1.56663	-0.425847	0.670219	0.999811
CENPH	6.73315	1.74069	1.4533	1.19775	0.231013	0.999811
CEP112	16.1351	-2.02088	1.35552	-1.49085	0.136002	0.999811
CEP120	7.46625	3.55427	2.61152	1.361	0.173514	0.999811
CEP41	15.9871	0.688729	1.30194	0.529004	0.596803	0.999811
CEP44	12.3276	-1.07914	2.16452	-0.49856	0.618089	0.999811
CEP57	10.9748	0.669434	1.0297	0.650127	0.51561	0.999811
CEP63	23.6627	0.842526	1.22992	0.685024	0.493329	0.999811
CEP76	7.01259	1.87125	2.08816	0.896123	0.370187	0.999811
CEP89	14.5142	0.683713	1.1956	0.57186	0.567417	0.999811
CEP95	18.4564	-0.666106	1.50135	-0.443672	0.65728	0.999811
CEPT1	11.702	2.12772	1.31532	1.61764	0.105741	0.999811
CERCAM	170.137	-0.160731	0.3122	-0.514832	0.60667	0.999811
CERS5	42.8495	-0.782889	1.17169	-0.668172	0.504024	0.999811
CES2	8.34251	0.894519	1.06653	0.838717	0.401628	0.999811
CETN2	18.6864	0.0825583	0.806038	0.102425	0.918419	0.999811
CETN3	40.5997	-0.334249	0.667491	-0.500755	0.616544	0.999811
CFAP20	21.572	-1.18925	0.758604	-1.56768	0.116956	0.999811
CFAP36	50.3697	0.266085	0.550594	0.483269	0.628905	0.999811
CFAP97	8.34377	0.903949	1.07588	0.840197	0.400798	0.999811
CFDP1	63.6442	-0.518919	0.464902	-1.11619	0.26434	0.999811
CFH	46.1122	-0.822403	0.664208	-1.23817	0.215653	0.999811
CFL1	13.6316	0.41047	0.845985	0.485198	0.627536	0.999811
CFL2	15.6525	0.000571584	0.81392	0.00070226	0.99944	0.999811
CGGBP1	7.1482	0.488256	1.17179	0.416674	0.676917	0.999811
CGRRF1	34.3326	0.859175	0.627555	1.36908	0.170973	0.999811
CH17-385C13.2	20.0436	-0.0052876	0.731783	-0.00722564	0.994235	0.999811
CH17-431G21.1	8.13503	0.709757	1.25738	0.564473	0.572432	0.999811
CH17-472G23.4	14.5586	-0.865455	1.1254	-0.769023	0.44188	0.999811
CH17-478G19.2	28.6708	-0.081649	0.652631	-0.125108	0.900438	0.999811
CH507-513H4.3	32.5586	0.08294	0.624836	0.132739	0.8944	0.999811
CH507-513H4.4	33.4793	0.0490325	0.601914	0.081461	0.935075	0.999811
CH507-513H4.5	15.3173	0.144634	0.813614	0.177767	0.858906	0.999811
CH507-513H4.6	35.7657	-0.182425	0.610644	-0.298742	0.765137	0.999811
CH507-9B2.3	13.5263	-0.3485	0.89317	-0.390183	0.696401	0.999811
CHAC1	7.24248	-0.153834	1.19201	-0.129054	0.897315	0.999811
CHCHD2P2	36.0669	-0.253975	0.552519	-0.459668	0.645755	0.999811
CHCHD2P6	35.6558	-0.19118	0.558127	-0.342538	0.731946	0.999811
CHCHD2P9	15.6161	-0.525559	0.810686	-0.64829	0.516798	0.999811
CHCHD3P3	13.1204	-0.299804	0.90195	-0.332395	0.739591	0.999811
CHCHD4	7.77163	0.888442	1.12837	0.787369	0.431066	0.999811
CHCHD6	16.6243	0.238458	0.867178	0.274982	0.78333	0.999811
CHCHD7	10.6608	0.382905	1.15209	0.332356	0.73962	0.999811
CHD1L	64.9106	-1.05502	0.654315	-1.61241	0.106874	0.999811
CHD4	11.6263	1.28457	0.97747	1.31418	0.188787	0.999811
CHEK2	15.8266	1.64009	0.953038	1.7209	0.0852686	0.963578
CHFR	8.83623	3.07259	2.25582	1.36207	0.173175	0.999811
CHI3L1	10.595	-2.7756	1.385	-2.00404	0.045066	0.740806
CHIC2	22.8177	-0.299075	0.738171	-0.405157	0.685362	0.999811
CHID1	234.478	-0.466253	0.239969	-1.94297	0.0520194	0.778557
CHMP1A	34.792	-0.462458	0.660648	-0.700006	0.483924	0.999811
CHMP2A	49.9705	-0.982947	0.569536	-1.72587	0.0843705	0.963578
CHMP2B	26.3994	-0.0891455	0.665077	-0.134038	0.893373	0.999811
CHMP5	43.0139	-0.508204	0.716452	-0.709334	0.478117	0.999811
CHMP6	11.7137	-0.303081	1.09346	-0.277177	0.781644	0.999811
CHMP7	13.0231	0.449644	0.917557	0.490044	0.624103	0.999811
CHN1	60.873	-0.5864	0.519463	-1.12886	0.258958	0.999811
CHP1	28.6942	0.705861	0.798852	0.883595	0.376915	0.999811
CHRAC1	8.29198	-0.296912	1.2155	-0.244271	0.807021	0.999811
CHST10	7.01272	2.33828	1.42672	1.63892	0.10123	0.999811
CHTOP	15.1109	0.640004	1.3163	0.486214	0.626816	0.999811
CIAO1	18.0604	0.535877	0.934646	0.573348	0.566409	0.999811
CIAPIN1P	8.23893	1.00676	1.23455	0.815485	0.414795	0.999811
CIB1	28.5369	-0.487621	0.649302	-0.750992	0.452657	0.999811
CIDECP	10.0742	0.208106	1.61157	0.129133	0.897253	0.999811
CINP	53.8548	0.11459	0.49745	0.230354	0.817816	0.999811
CIR1	12.2857	0.611969	0.966969	0.632873	0.526817	0.999811
CIRBP	26.6529	0.12599	0.688201	0.183072	0.854742	0.999811
CISD2	15.0016	-0.315446	1.33506	-0.236278	0.813217	0.999811
CIZ1	61.5408	0.141731	0.454095	0.312118	0.754951	0.999811
CKAP2	6.93835	-0.504252	1.61623	-0.311993	0.755046	0.999811
CKAP4	6.83367	-0.888914	1.5349	-0.579134	0.562499	0.999811
CKAP5	10.5928	-0.0730015	1.03801	-0.0703285	0.943932	0.999811
CLCC1	31.0231	0.620182	0.686615	0.903246	0.366396	0.999811
CLCN3	16.3613	-1.30661	1.15933	-1.12704	0.259727	0.999811
CLDN11	24.3623	0.910863	0.728096	1.25102	0.210927	0.999811
CLDND1	14.4241	0.0504822	0.996071	0.0506813	0.959579	0.999811
CLEC16A	8.27082	-0.313384	1.95765	-0.160082	0.872817	0.999811
CLEC2B	13.0138	-3.03068	1.25749	-2.4101	0.0159482	0.465416
CLIC1	35.4006	0.139555	0.546749	0.255245	0.798534	0.999811
CLIC1P1	18.0901	-0.131012	0.75592	-0.173315	0.862404	0.999811
CLIC4	93.0591	0.26771	0.395245	0.677327	0.498199	0.999811
CLIC4P1	8.58047	0.498357	1.13655	0.438482	0.661037	0.999811
CLIC4P2	12.1885	0.744621	0.923207	0.80656	0.41992	0.999811
CLINT1	34.4477	-0.260083	0.611899	-0.425043	0.670805	0.999811
CLIP3	12.1794	0.56439	1.02522	0.550506	0.581972	0.999811
CLIP4	11.843	-4.82423	1.69431	-2.84731	0.00440904	0.24612
CLK1	7.21455	-1.01668	2.15381	-0.472039	0.636899	0.999811
CLK3	37.2737	-1.40609	0.623622	-2.25471	0.0241514	0.554549
CLK4	7.34231	-5.52393	2.03533	-2.71402	0.00664719	0.297504
CLMP	14.7958	0.229542	1.01198	0.226824	0.820561	0.999811
CLNS1A	41.9102	0.0987634	0.571088	0.172939	0.862699	0.999811
CLNS1AP1	19.6741	0.380445	0.751598	0.506182	0.612729	0.999811
CLPP	48.9223	-1.24516	0.699901	-1.77905	0.075231	0.936168
CLPTM1	10.4811	0.716701	1.08832	0.658539	0.510192	0.999811
CLPTM1L	13.0998	-0.624315	1.32878	-0.46984	0.638469	0.999811
CLPX	31.5154	0.346231	1.3916	0.248801	0.803515	0.999811
CLTA	82.7448	-0.373026	0.433128	-0.861238	0.389107	0.999811
CLTB	8.24511	-5.7064	1.89332	-3.01397	0.00257857	0.196192
CLTC	35.4113	-0.0957198	0.708195	-0.13516	0.892485	0.999811
CLU	3835.84	-0.195163	0.137745	-1.41685	0.156528	0.999811
CLUAP1	39.9668	-0.830671	0.64051	-1.29689	0.19467	0.999811
CLYBL	12.4604	0.0197555	1.03703	0.0190501	0.984801	0.999811
CMAS	20.7658	0.570634	1.52548	0.374068	0.708354	0.999811
CMBL	55.228	0.203557	0.471261	0.43194	0.665785	0.999811
CMC2	18.5334	-0.363941	1.14736	-0.317199	0.751093	0.999811
CMPK1	30.6639	0.675458	0.585941	1.15277	0.249003	0.999811
CMSS1	105.724	0.433097	0.432816	1.00065	0.316995	0.999811
CMTM3	16.2612	-0.282761	1.22417	-0.230981	0.817329	0.999811
CMTM6	7.60712	0.517941	1.23769	0.418474	0.6756	0.999811
CMTM7	11.445	1.38839	1.08488	1.27976	0.200628	0.999811
CMTR1	7.74048	0.0946057	2.03468	0.0464967	0.962914	0.999811
CNBP	138.685	0.0965165	0.351718	0.274415	0.783766	0.999811
CNDP2	80.5598	0.434866	0.519822	0.836567	0.402836	0.999811
CNEP1R1	20.4651	-0.775642	1.34061	-0.578575	0.562876	0.999811
CNIH1	160.934	-0.258583	0.32927	-0.785323	0.432264	0.999811
CNIH3	13.4122	-0.0794016	1.04398	-0.0760566	0.939374	0.999811
CNIH4	14.7338	0.290605	1.3378	0.217227	0.828032	0.999811
CNN2	71.0976	-0.664047	0.530622	-1.25145	0.21077	0.999811
CNN2P12	9.04479	-0.343689	1.09984	-0.312489	0.754669	0.999811
CNN3	327.562	0.251372	0.243091	1.03406	0.301107	0.999811
CNOT10	14.5978	1.16375	1.35485	0.858955	0.390365	0.999811
CNOT11	14.921	0.717915	1.1684	0.614445	0.538921	0.999811
CNOT2	102.597	0.327927	0.392125	0.836282	0.402996	0.999811
CNOT4	14.1332	0.120617	1.56745	0.0769511	0.938662	0.999811
CNOT7	12.0185	0.384788	1.23419	0.311774	0.755212	0.999811
CNOT8	28.4384	1.15518	0.740553	1.55989	0.118785	0.999811
CNOT9	25.5429	-1.08759	0.697308	-1.55969	0.118832	0.999811
CNP	19.9295	1.42463	0.99999	1.42464	0.15426	0.999811
CNPPD1	11.633	-0.947414	0.965327	-0.981444	0.326374	0.999811
CNPY3	40.6908	0.17942	0.58561	0.306382	0.759314	0.999811
CNPY4	10.6319	-0.46803	1.17473	-0.398415	0.690324	0.999811
CNRIP1	19.1022	-0.00746069	0.797392	-0.00935637	0.992535	0.999811
CNST	22.5229	1.4401	0.782469	1.84046	0.0657005	0.894938
COA1	21.3842	-0.551849	0.699249	-0.789202	0.429994	0.999811
COA4	8.09071	0.621539	1.14169	0.544404	0.586164	0.999811
COA7	9.77343	-0.989876	1.1519	-0.859341	0.390153	0.999811
COG2	36.4523	-0.284466	0.573718	-0.49583	0.620015	0.999811
COG4	87.2639	0.723953	0.399271	1.81319	0.0698026	0.913436
COG5	77.0966	-0.108334	0.460266	-0.235373	0.813919	0.999811
COG6	44.9949	0.561333	0.750632	0.747814	0.454573	0.999811
COG7	23.3687	-0.317034	1.48834	-0.213012	0.831317	0.999811
COL11A1	11.5678	-2.83067	1.39942	-2.02274	0.0431004	0.721783
COL12A1	25.2717	-0.050816	0.994038	-0.0511207	0.959229	0.999811
COL14A1	35.376	-1.07608	0.824035	-1.30587	0.191596	0.999811
COL15A1	96.5826	-1.89711	1.86236	-1.01866	0.308365	0.999811
COL1A1	643.828	-1.08247	0.209753	-5.16068	2.4606e-07	0.000262103
COL1A2	7030.82	-0.0432887	0.171577	-0.2523	0.800809	0.999811
COL21A1	12.4973	0.732848	1.93144	0.379432	0.704367	0.999811
COL3A1	2813.71	-0.42488	0.228257	-1.86141	0.0626859	0.876286
COL5A1	35.4073	-1.05471	0.571739	-1.84474	0.0650752	0.893709
COL5A2	118.11	-1.06581	0.619539	-1.72033	0.085372	0.963578
COL6A1	180.279	-0.165771	0.256566	-0.646116	0.518204	0.999811
COL6A2	71.8595	-0.240774	0.442426	-0.544214	0.586294	0.999811
COL6A3	631.934	-0.430795	0.234506	-1.83703	0.0662053	0.899513
COL8A1	100.806	0.341407	0.330035	1.03446	0.300922	0.999811
COLGALT1	13.8903	-2.42684	1.15974	-2.09257	0.0363877	0.667108
COMMD10	12.658	-0.482339	0.942476	-0.511778	0.608806	0.999811
COMMD2	15.8458	-1.89621	1.82431	-1.03941	0.298613	0.999811
COMMD3	10.139	-0.444327	1.00028	-0.4442	0.656898	0.999811
COMMD4	12.6342	0.403526	0.946376	0.426391	0.669823	0.999811
COMMD5	12.7379	-0.390062	0.970879	-0.401762	0.68786	0.999811
COMMD7	25.5146	-0.870609	1.26054	-0.690664	0.489777	0.999811
COMMD8	37.835	0.182949	0.573217	0.319163	0.749603	0.999811
COMMD9	43.7064	-0.107956	0.508872	-0.212147	0.831992	0.999811
COMP	13.1415	-3.90435	1.32495	-2.9468	0.00321079	0.221556
COMT	144.725	0.248942	0.300646	0.828021	0.407658	0.999811
COPA	85.6867	-0.35167	0.586518	-0.599589	0.54878	0.999811
COPB1	213.547	0.0884979	0.419859	0.21078	0.833059	0.999811
COPB2	244.256	-0.129277	0.362967	-0.356169	0.721714	0.999811
COPE	142.263	-0.621044	0.461653	-1.34526	0.178541	0.999811
COPG1	184.128	0.416236	0.370258	1.12418	0.260937	0.999811
COPG2	15.7989	-0.627966	1.46551	-0.428498	0.668289	0.999811
COPRS	9.98499	0.92117	1.0066	0.915133	0.360122	0.999811
COPS2	93.0107	0.45942	0.399056	1.15126	0.249623	0.999811
COPS3	112.762	-0.673474	0.557515	-1.20799	0.22705	0.999811
COPS4	131.671	0.109912	0.384518	0.285843	0.774998	0.999811
COPS5	89.4241	0.115336	0.37103	0.310853	0.755912	0.999811
COPS5P1	8.72602	0.222878	1.05124	0.212014	0.832096	0.999811
COPS6	41.2776	-0.535638	0.553196	-0.968261	0.332914	0.999811
COPS7A	67.4817	0.521726	0.435479	1.19805	0.230897	0.999811
COPS7B	22.541	1.19378	0.986878	1.20965	0.226413	0.999811
COPS8	37.5614	-0.143497	0.534902	-0.268268	0.788493	0.999811
COPS8P2	36.2289	-0.0839957	0.556346	-0.150977	0.879993	0.999811
COPZ1	178.906	0.252493	0.270932	0.931941	0.351367	0.999811
COPZ2	89.0418	-0.637936	0.487271	-1.3092	0.190466	0.999811
COQ10B	52.1958	-0.770766	0.594198	-1.29715	0.194578	0.999811
COQ3	8.27845	-0.149513	1.53087	-0.0976654	0.922198	0.999811
COQ4	21.3929	-0.611312	0.724666	-0.843577	0.398906	0.999811
COQ5	39.1693	1.45965	0.767727	1.90126	0.0572674	0.834633
COQ7	7.03363	-0.122717	1.59951	-0.0767219	0.938845	0.999811
COQ9	35.956	0.475416	0.686925	0.692093	0.488879	0.999811
CORO1C	48.0025	1.29071	0.659846	1.95608	0.0504553	0.776101
COX11	8.93189	0.797597	1.17259	0.680203	0.496376	0.999811
COX15	23.133	2.35072	0.921201	2.5518	0.0107167	0.383068
COX4I1	61.4125	-0.303804	0.496197	-0.612266	0.540362	0.999811
COX4I1P1	13.0865	-0.297492	0.934441	-0.318364	0.750209	0.999811
COX7A2L	132.913	-0.129539	0.310462	-0.417245	0.676499	0.999811
CPE	105.531	-1.48062	0.470139	-3.14932	0.00163653	0.151403
CPNE1	8.71436	-2.10699	1.33778	-1.57499	0.115258	0.999811
CPNE3	20.2178	-0.242464	0.780824	-0.310523	0.756163	0.999811
CPNE8	7.91222	0.610555	1.49447	0.408543	0.682875	0.999811
CPPED1	15.4544	0.519778	1.18245	0.439578	0.660243	0.999811
CPQ	136.282	0.244437	0.31431	0.777695	0.436749	0.999811
CPSF2	26.8848	-0.95273	1.21399	-0.784795	0.432574	0.999811
CPSF3	89.2736	0.711368	0.708734	1.00372	0.315515	0.999811
CPSF3L	37.3271	0.86715	1.0094	0.859073	0.3903	0.999811
CPSF4	26.0388	-0.353214	0.8572	-0.412056	0.680299	0.999811
CPSF6	38.7217	-0.246006	0.539042	-0.456376	0.64812	0.999811
CPSF7	17.742	0.970116	1.25688	0.771842	0.440208	0.999811
CPT1A	10.1566	-0.244035	1.68954	-0.144439	0.885154	0.999811
CRABP2	66.2155	0.230423	0.450519	0.511461	0.609029	0.999811
CRADD	9.7269	-0.310541	1.03817	-0.299123	0.764846	0.999811
CRAT	36.5243	-0.318928	0.83949	-0.379907	0.704014	0.999811
CRBN	48.9866	0.666934	0.498724	1.33728	0.181132	0.999811
CREB1	18.9695	1.55301	1.15008	1.35035	0.176902	0.999811
CREB3	11.0286	-0.158803	0.941629	-0.168647	0.866074	0.999811
CREB3L1	46.6595	-0.690888	0.503164	-1.37309	0.169725	0.999811
CREB3L2	8.40414	-0.659209	1.34727	-0.489294	0.624634	0.999811
CREBL2	11.2946	0.91948	1.3393	0.686539	0.492373	0.999811
CREG1	50.1063	-0.55537	0.463434	-1.19838	0.230769	0.999811
CRELD1	6.64258	1.38311	1.56306	0.88487	0.376227	0.999811
CRELD2	24.0259	-2.35435	1.06621	-2.20815	0.0272339	0.596904
CREM	9.36054	0.575988	1.06066	0.543046	0.587098	0.999811
CRIPT	14.8	0.303338	0.8831	0.343493	0.731228	0.999811
CRK	12.3662	0.0662618	0.981956	0.0674794	0.9462	0.999811
CRNKL1	24.9943	0.679813	0.764668	0.889031	0.373987	0.999811
CROT	12.1813	-0.644101	1.52116	-0.423427	0.671984	0.999811
CRTAP	174.512	0.0480013	0.401773	0.119474	0.9049	0.999811
CRY2	9.06753	1.69103	1.32617	1.27512	0.202267	0.999811
CRYBB2	6.792	-0.153898	1.20281	-0.127949	0.89819	0.999811
CRYBB2P1	17.4666	-0.396359	0.867698	-0.456794	0.647819	0.999811
CRYL1	37.5324	-0.926886	0.778016	-1.19135	0.233518	0.999811
CRYZ	27.7115	0.9078	1.20572	0.752909	0.451505	0.999811
CRYZL1	65.6816	0.679251	0.539056	1.26007	0.207642	0.999811
CSAD	8.03999	0.612546	1.67971	0.364673	0.715356	0.999811
CSDAP1	7.07874	0.521704	1.16667	0.447172	0.654751	0.999811
CSDE1	323.403	0.413108	0.326168	1.26655	0.205316	0.999811
CSE1L	108.564	0.00918381	0.61342	0.0149715	0.988055	0.999811
CSF1	13.2858	0.120993	1.2096	0.100028	0.920322	0.999811
CSGALNACT2	16.0569	-0.512032	0.920792	-0.556077	0.578158	0.999811
CSNK1A1	24.1569	0.249351	0.763421	0.326623	0.743953	0.999811
CSNK1A1P1	24.8384	0.0714526	0.763542	0.0935805	0.925442	0.999811
CSNK1D	9.45628	0.75956	1.33301	0.569809	0.568807	0.999811
CSNK2A1	9.55879	1.06295	1.1603	0.916098	0.359615	0.999811
CSNK2A2	7.46742	-1.86411	1.90656	-0.977738	0.328204	0.999811
CSRP1	101.029	-0.612489	0.400647	-1.52875	0.126327	0.999811
CSRP2	13.9855	-1.15284	1.40313	-0.821618	0.411294	0.999811
CST3	154.704	-0.321463	0.283988	-1.13196	0.257652	0.999811
CSTB	6.9005	-0.451778	1.33059	-0.339532	0.734209	0.999811
CSTF1	26.7454	-0.52479	0.962092	-0.545468	0.585432	0.999811
CSTF2	20.5194	-0.159449	0.809106	-0.197068	0.843774	0.999811
CSTF3	16.2616	1.46151	1.32634	1.10191	0.270501	0.999811
CTB-158E9.2	6.94573	0.402877	1.23398	0.326486	0.744057	0.999811
CTB-33G10.1	54.2276	-0.129396	0.455748	-0.28392	0.776472	0.999811
CTB-52I2.4	9.28076	0.787682	1.06573	0.739104	0.459844	0.999811
CTBS	22.2984	-0.00478141	0.748909	-0.0063845	0.994906	0.999811
CTC-308K20.3	23.1004	0.502491	0.708769	0.708963	0.478348	0.999811
CTC-329H14.1	140.457	-0.156687	0.318194	-0.492425	0.622419	0.999811
CTC-422A18.2	10.0808	-0.656193	1.01708	-0.645171	0.518817	0.999811
CTC-451P13.1	120.067	-0.479186	0.329222	-1.45551	0.145528	0.999811
CTC-512J14.5	7.08753	-1.00792	1.25944	-0.800289	0.423543	0.999811
CTCF	8.48374	-5.73088	2.09496	-2.73556	0.0062275	0.285928
CTD-2033A16.2	26.5418	-0.129444	0.634273	-0.204083	0.838288	0.999811
CTD-2033D24.2	14.8144	-0.904041	0.859811	-1.05144	0.293056	0.999811
CTD-2060C23.1	11.6268	0.572495	1.07802	0.531064	0.595375	0.999811
CTD-2270N23.1	16.7444	0.546357	0.793349	0.688672	0.49103	0.999811
CTD-2538A21.1	30.969	0.0429276	0.633067	0.067809	0.945938	0.999811
CTD-2560C21.1	9.73477	0.337904	1.018	0.33193	0.739942	0.999811
CTD-2620I22.2	36.043	-0.0182421	0.582086	-0.0313393	0.974999	0.999811
CTD-2651C21.3	12.0182	0.161076	0.965166	0.166889	0.867457	0.999811
CTDSP1	9.22107	-0.212064	1.10845	-0.191316	0.848278	0.999811
CTDSP2	12.9843	-0.559174	0.918918	-0.608514	0.542847	0.999811
CTGF	44.9532	-0.688969	0.529691	-1.3007	0.193361	0.999811
CTH	19.7916	-0.411715	1.93696	-0.212557	0.831672	0.999811
CTHRC1	231.304	-0.705965	0.296296	-2.38263	0.0171895	0.476845
CTNNA1	21.8854	0.105031	0.692974	0.151566	0.87953	0.999811
CTNNA1P1	18.733	-0.00562613	0.758994	-0.00741261	0.994086	0.999811
CTNNAL1	102.417	0.421079	0.570538	0.73804	0.46049	0.999811
CTNNB1	76.0218	-0.108297	0.700737	-0.154548	0.877178	0.999811
CTNNBL1	16.3312	-1.79197	0.881294	-2.03334	0.0420182	0.721783
CTNND1	15.2524	0.287687	0.882812	0.325875	0.744519	0.999811
CTNS	8.49741	-2.4152	1.39823	-1.72733	0.0841088	0.963578
CTPS1	19.1071	1.00733	1.34182	0.75072	0.452821	0.999811
CTR9	34.8353	0.965672	0.925659	1.04323	0.296843	0.999811
CTSA	37.3691	0.270561	0.540231	0.500824	0.616495	0.999811
CTSB	1576.9	0.0487333	0.104806	0.464984	0.641943	0.999811
CTSC	47.7543	0.675543	0.66729	1.01237	0.311362	0.999811
CTSF	9.98757	-0.777435	1.09875	-0.707562	0.479217	0.999811
CTSK	1002.43	-0.202312	0.165634	-1.22144	0.221919	0.999811
CTSL	96.3492	-0.6436	0.44739	-1.43857	0.150274	0.999811
CTSO	16.7764	-0.416286	0.92641	-0.449354	0.653176	0.999811
CTSZ	9.44542	0.598454	1.54533	0.387265	0.69856	0.999811
CTTN	110.653	0.27968	0.376345	0.743148	0.457392	0.999811
CTTNBP2NL	9.20765	-1.48068	1.53067	-0.967341	0.333373	0.999811
CUEDC2	34.0984	0.14672	0.569677	0.257549	0.796755	0.999811
CUL1	6.64105	-2.47248	1.54837	-1.59683	0.110304	0.999811
CUL2	98.1083	0.271665	0.410819	0.661277	0.508435	0.999811
CUL3	18.0838	-0.113818	1.03743	-0.109712	0.912638	0.999811
CUL4A	53.4564	-1.04717	0.945474	-1.10756	0.268053	0.999811
CUL4B	12.4206	-1.00923	1.66141	-0.607453	0.543551	0.999811
CUTA	10.6711	-0.800298	1.01493	-0.788526	0.430389	0.999811
CUTC	48.9913	-0.494697	0.466022	-1.06153	0.288449	0.999811
CUX1	71.5711	1.27902	0.63867	2.00262	0.0452176	0.741012
CWC15	46.0403	-0.751666	0.614984	-1.22225	0.221612	0.999811
CWC22	23.0858	1.00096	1.47206	0.679968	0.496524	0.999811
CWC25	23.2749	0.00282612	0.930905	0.00303588	0.997578	0.999811
CWC27	39.6945	-1.1553	0.570767	-2.02412	0.0429574	0.721783
CWF19L1	22.819	1.10469	0.941502	1.17332	0.240667	0.999811
CXCL12	85.7647	-0.0902843	0.515052	-0.175292	0.86085	0.999811
CXorf40A	6.66581	-2.44717	1.5818	-1.54708	0.121844	0.999811
CXorf40B	11.987	-0.462292	0.931136	-0.496482	0.619555	0.999811
CYB561A3	26.8083	-0.257169	0.668228	-0.384852	0.700347	0.999811
CYB5A	21.8302	0.0580912	0.773217	0.0751292	0.940112	0.999811
CYB5B	41.069	0.172324	0.518107	0.332604	0.739433	0.999811
CYB5D2	30.7426	0.106755	0.647579	0.164852	0.869061	0.999811
CYB5R1	22.1077	0.293705	0.979654	0.299805	0.764326	0.999811
CYB5R2	24.9756	0.28752	0.937128	0.306809	0.758989	0.999811
CYB5R3	321.192	0.346076	0.200547	1.72566	0.0844091	0.963578
CYB5R4	22.2304	0.946772	1.43115	0.661546	0.508262	0.999811
CYBRD1	132.165	0.0281607	0.391183	0.0719886	0.942611	0.999811
CYC1	26.969	-0.161896	0.694463	-0.233124	0.815665	0.999811
CYCS	23.1385	-1.48186	0.719365	-2.05996	0.0394022	0.6949
CYFIP1	24.8829	0.650534	1.25224	0.519494	0.603416	0.999811
CYFIP2	7.51373	2.28937	2.65296	0.862949	0.388166	0.999811
CYLD	8.23889	-0.218421	2.75477	-0.0792885	0.936803	0.999811
CYP20A1	6.66705	1.54412	2.39276	0.64533	0.518714	0.999811
CYP51A1P1	19.9212	1.49756	0.779161	1.92202	0.0546031	0.80489
CYP51A1P2	25.8276	1.38298	0.652784	2.11858	0.0341259	0.653157
CYR61	115.975	-0.0929537	0.313806	-0.296213	0.767067	0.999811
CYSTM1	34.5527	-0.0733044	0.628098	-0.116709	0.907091	0.999811
CYTH2	10.4541	0.320656	2.03708	0.15741	0.874922	0.999811
CYTOR	8.61313	1.42895	1.19273	1.19805	0.230897	0.999811
DAAM1	10.7559	1.5173	1.99425	0.760839	0.446753	0.999811
DAB2	334.08	0.707228	0.304139	2.32535	0.0200534	0.50143
DAD1	15.8613	-0.115836	0.998626	-0.115996	0.907656	0.999811
DAGLB	11.7721	-0.422008	2.05525	-0.205332	0.837313	0.999811
DAP	20.5919	-0.200515	0.752301	-0.266536	0.789826	0.999811
DAP3	139.27	0.596176	0.39377	1.51402	0.130021	0.999811
DAP3P2	18.9149	0.530512	0.78047	0.679733	0.496674	0.999811
DARS	169.319	0.345676	0.326352	1.05921	0.289503	0.999811
DAXX	12.3441	0.319926	1.03664	0.308617	0.757613	0.999811
DAZAP2	60.8027	0.379826	0.651715	0.58281	0.560021	0.999811
DBI	10.3578	0.879023	1.06895	0.822323	0.410893	0.999811
DBN1	19.4514	-0.620823	0.876384	-0.708392	0.478702	0.999811
DBNL	26.6707	0.183272	0.666167	0.275115	0.783228	0.999811
DBR1	12.4847	-0.285478	1.61271	-0.177017	0.859495	0.999811
DCAF11	8.72479	0.979758	1.04773	0.93512	0.349726	0.999811
DCAF12	10.8253	1.40175	1.38527	1.01189	0.311589	0.999811
DCAF13	10.0166	0.873037	1.01118	0.86338	0.387929	0.999811
DCAF13P1	11.5977	0.333158	0.952418	0.349802	0.726487	0.999811
DCAF13P3	12.7393	0.616783	0.952401	0.647608	0.517238	0.999811
DCAF4	12.8089	0.988332	1.60272	0.616659	0.53746	0.999811
DCAF5	10.7269	-0.764519	1.29741	-0.589265	0.555683	0.999811
DCAF6	39.1707	0.235239	0.799766	0.294134	0.768656	0.999811
DCAKD	25.0801	0.462252	0.702318	0.658181	0.510422	0.999811
DCK	10.0675	0.279136	1.47757	0.188916	0.850158	0.999811
DCN	2794.81	-0.0176541	0.139197	-0.126829	0.899076	0.999811
DCP1B	19.7488	0.350274	0.812653	0.431025	0.66645	0.999811
DCPS	14.7266	-1.57195	1.21383	-1.29503	0.195309	0.999811
DCTD	46.8972	0.0820618	0.543785	0.150908	0.880048	0.999811
DCTN1	10.5999	0.852994	1.08206	0.788309	0.430516	0.999811
DCTN2	73.7978	-0.0465612	0.485917	-0.0958213	0.923662	0.999811
DCTN3	39.1698	-0.257246	0.62379	-0.412393	0.680052	0.999811
DCTN4	26.3049	0.14118	0.966858	0.14602	0.883906	0.999811
DCTN5	18.3614	1.09162	0.92965	1.17423	0.240303	0.999811
DCTN6	13.561	0.316252	0.870687	0.363221	0.71644	0.999811
DCTPP1	8.68403	-0.354012	1.05517	-0.335503	0.737246	0.999811
DCUN1D1	11.5558	-0.0270393	1.2655	-0.0213664	0.982953	0.999811
DCUN1D2	7.72571	0.372525	1.52426	0.244397	0.806923	0.999811
DCUN1D4	18.997	0.634832	1.28577	0.493736	0.621493	0.999811
DCUN1D5	34.7978	-0.509072	0.561581	-0.906498	0.364672	0.999811
DCXR	7.94759	-0.122599	1.20242	-0.10196	0.918788	0.999811
DDA1	16.987	-0.0209053	0.881098	-0.0237264	0.981071	0.999811
DDAH1	23.3438	-0.272219	0.707572	-0.384722	0.700443	0.999811
DDAH2	13.3976	-0.685353	0.929279	-0.737511	0.460811	0.999811
DDB1	202.683	0.183584	0.380424	0.482577	0.629396	0.999811
DDB2	35.1227	0.200005	0.667582	0.299596	0.764485	0.999811
DDHD2	8.98424	1.813	1.87913	0.964811	0.334639	0.999811
DDIT3	7.78473	-0.693064	1.22478	-0.56587	0.571482	0.999811
DDOST	129.611	0.0564518	0.365114	0.154614	0.877125	0.999811
DDR2	22.0195	0.0613188	0.72705	0.0843392	0.932787	0.999811
DDRGK1	9.64301	-0.63245	1.214	-0.520964	0.602392	0.999811
DDX1	175.996	0.158482	0.302027	0.524729	0.599771	0.999811
DDX19A	10.214	-0.151231	1.32129	-0.114457	0.908876	0.999811
DDX19B	16.0772	-0.0704069	0.89034	-0.0790787	0.93697	0.999811
DDX21	9.57936	0.543543	1.99297	0.272731	0.78506	0.999811
DDX24	60.6449	-0.546518	0.699376	-0.781436	0.434546	0.999811
DDX27	56.9284	0.771233	0.692148	1.11426	0.265167	0.999811
DDX31	11.952	2.65034	1.81214	1.46255	0.14359	0.999811
DDX39A	10.5656	0.49098	1.02971	0.476812	0.633496	0.999811
DDX3X	9.98349	-0.413374	1.11971	-0.369179	0.711994	0.999811
DDX42	22.7966	0.182508	1.29095	0.141375	0.887573	0.999811
DDX46	37.2895	-0.200563	1.55431	-0.129036	0.897329	0.999811
DDX49	39.8396	-1.42965	1.08759	-1.31451	0.188675	0.999811
DDX5	151.941	-0.559503	0.324779	-1.72272	0.0849395	0.963578
DDX50	6.68463	0.495055	1.31783	0.375658	0.707171	0.999811
DDX50P1	8.64997	-0.0988497	1.24448	-0.0794308	0.93669	0.999811
DDX50P2	9.97698	0.113405	1.12179	0.101092	0.919477	0.999811
DDX52	18.024	-2.18033	1.20072	-1.81586	0.0693918	0.910298
DDX56	29.8834	0.371952	0.656045	0.566962	0.57074	0.999811
DDX58	19.1891	0.37231	1.75739	0.211854	0.832221	0.999811
DDX59	8.77426	1.32394	2.10896	0.62777	0.530155	0.999811
DDX60	22.4083	-7.16525	4.40933	-1.62502	0.104158	0.999811
DEAF1	9.79582	-0.541464	1.21738	-0.444779	0.656479	0.999811
DECR1	146.335	-0.380293	0.340436	-1.11708	0.263961	0.999811
DEF8	7.94302	0.998308	1.19838	0.833051	0.404816	0.999811
DEGS1	49.8383	0.507257	0.467814	1.08431	0.278226	0.999811
DEK	33.1804	0.540115	0.673698	0.801717	0.422717	0.999811
DENND5A	8.95373	2.27464	1.69197	1.34437	0.178827	0.999811
DENR	38.1548	0.26014	0.546184	0.476287	0.63387	0.999811
DEPTOR	74.1636	0.583876	0.498811	1.17054	0.241785	0.999811
DERA	79.6446	-0.280507	0.412044	-0.680769	0.496017	0.999811
DERL1	30.9723	-1.03815	1.01228	-1.02555	0.305103	0.999811
DERL2	94.8215	-0.228019	0.367102	-0.621133	0.534512	0.999811
DESI1	8.5298	0.66053	1.52231	0.4339	0.664361	0.999811
DFFA	15.4037	-1.06258	0.936808	-1.13426	0.256687	0.999811
DFNA5	68.4063	0.0401261	0.622758	0.064433	0.948625	0.999811
DGCR2	14.2847	0.566093	1.482	0.381978	0.702478	0.999811
DGCR6	16.7188	-0.029392	0.872021	-0.0337056	0.973112	0.999811
DGCR6L	27.526	-0.823488	0.649366	-1.26814	0.204747	0.999811
DGKA	8.8237	1.07063	1.44596	0.740427	0.459041	0.999811
DGUOK	20.5674	-0.488233	0.890139	-0.54849	0.583355	0.999811
DHCR24	50.9161	1.96553	0.630932	3.11528	0.00183772	0.163128
DHCR7	68.2501	1.39237	0.54996	2.53177	0.0113488	0.397657
DHDDS	19.5875	0.508963	0.873495	0.582674	0.560113	0.999811
DHPS	17.4102	-1.0038	0.815422	-1.23102	0.218314	0.999811
DHRS1	8.59355	0.29491	1.23659	0.238486	0.811504	0.999811
DHRS12	7.39399	-5.56853	2.6441	-2.10602	0.0352022	0.657849
DHRS4	11.0826	0.170594	1.32319	0.128926	0.897416	0.999811
DHRS4L2	10.8457	0.116009	1.42272	0.0815398	0.935013	0.999811
DHRS7	135.381	0.0157052	0.284698	0.0551644	0.956007	0.999811
DHRS7B	19.6993	-0.00809297	0.976126	-0.0082909	0.993385	0.999811
DHRSX	23.9751	0.422306	0.649833	0.649868	0.515777	0.999811
DHX15	141.321	-0.248952	0.615352	-0.404569	0.685795	0.999811
DHX29	23.3332	0.420187	0.668673	0.628389	0.529749	0.999811
DHX30	17.5426	0.246449	1.07685	0.228862	0.818976	0.999811
DHX35	8.89782	-4.38032	1.83993	-2.3807	0.0172796	0.476845
DHX36	13.207	0.669272	1.71712	0.389765	0.69671	0.999811
DHX40	7.89018	-0.223176	1.60633	-0.138935	0.889501	0.999811
DHX8	14.3649	-0.955827	1.87026	-0.511066	0.609305	0.999811
DIABLO	29.0404	-0.343874	0.65291	-0.526679	0.598417	0.999811
DIAPH1	8.53262	2.57337	1.18142	2.17821	0.0293902	0.626128
DIEXF	15.5973	-1.03208	1.18204	-0.873131	0.382592	0.999811
DIMT1	80.8941	-0.249281	0.384351	-0.648577	0.516612	0.999811
DIS3	9.98449	0.295978	1.12721	0.262575	0.792878	0.999811
DKC1	37.6191	-0.747641	0.664458	-1.12519	0.260508	0.999811
DKK1	12.6195	1.2771	0.916398	1.3936	0.163437	0.999811
DKK3	44.9287	0.605511	0.582039	1.04033	0.298188	0.999811
DLAT	20.4156	0.987274	1.29438	0.762737	0.44562	0.999811
DLC1	8.07047	-2.21669	1.60192	-1.38377	0.166429	0.999811
DLD	85.1444	-0.0958786	0.515089	-0.18614	0.852335	0.999811
DLGAP4	15.8263	-0.984507	1.24942	-0.787973	0.430713	0.999811
DMAP1	9.3338	0.471553	1.01067	0.466574	0.640804	0.999811
DMGDH	9.01762	1.18869	1.66364	0.71451	0.474912	0.999811
DMTF1	11.0269	-1.07719	2.18239	-0.493583	0.621601	0.999811
DNAJA1	59.6094	0.27509	0.441366	0.62327	0.533107	0.999811
DNAJA1P3	32.1795	-0.1295	0.570849	-0.226855	0.820537	0.999811
DNAJA2	77.2878	-0.187063	0.469968	-0.398034	0.690605	0.999811
DNAJA3	29.0693	0.114967	0.671927	0.171101	0.864144	0.999811
DNAJB1	32.8199	-0.332043	0.581887	-0.570631	0.56825	0.999811
DNAJB11	30.3837	-1.7042	0.674223	-2.52764	0.011483	0.39973
DNAJB12	15.9174	1.32814	0.886542	1.49812	0.134103	0.999811
DNAJB4	59.1796	0.416463	0.505051	0.824595	0.409601	0.999811
DNAJB9	29.5428	-0.676121	0.741129	-0.912286	0.361618	0.999811
DNAJC1	8.27919	-1.24132	1.79265	-0.692452	0.488653	0.999811
DNAJC10	127.38	0.578405	0.436062	1.32643	0.184698	0.999811
DNAJC11	32.7016	0.182199	0.653082	0.278983	0.780258	0.999811
DNAJC12	19.0044	-0.330155	0.863817	-0.382205	0.702309	0.999811
DNAJC13	9.77659	-2.00466	1.33634	-1.50012	0.133584	0.999811
DNAJC15	13.9069	0.776139	0.871992	0.890076	0.373425	0.999811
DNAJC18	15.43	0.49194	0.940253	0.5232	0.600835	0.999811
DNAJC2	18.8543	0.909087	0.849058	1.0707	0.284304	0.999811
DNAJC21	12.6112	0.518389	1.35616	0.382249	0.702277	0.999811
DNAJC3	11.9712	1.23759	1.30741	0.946593	0.343846	0.999811
DNAJC7	18.9758	0.00782776	0.805525	0.00971759	0.992247	0.999811
DNAJC8	27.8394	-0.599526	0.683462	-0.87719	0.380383	0.999811
DNAJC8P1	20.586	-0.373974	0.780142	-0.479367	0.631678	0.999811
DNASE2	25.5631	0.7107	0.712183	0.997917	0.318319	0.999811
DNM1L	33.4871	-1.69851	1.51452	-1.12149	0.262081	0.999811
DNM2	12.0451	-6.28559	2.32485	-2.70365	0.00685826	0.303905
DNM3OS	7.34288	-1.194	1.40567	-0.849416	0.39565	0.999811
DNPEP	66.5108	-0.829111	0.506181	-1.63797	0.101427	0.999811
DNTTIP1	30.0605	-0.732138	0.828266	-0.88394	0.376728	0.999811
DNTTIP2	37.3564	-0.782845	0.669067	-1.17006	0.241979	0.999811
DOCK1	13.1489	-3.75018	1.4184	-2.64395	0.00819452	0.331167
DOCK4	6.65362	6.90284	2.91232	2.37022	0.0177775	0.485068
DOCK7	7.98711	-0.151955	1.58448	-0.0959017	0.923599	0.999811
DOK5	31.4924	-0.918155	0.654173	-1.40354	0.160457	0.999811
DPAGT1	8.25274	-0.878283	1.11416	-0.788289	0.430528	0.999811
DPCD	10.9912	-1.16435	0.995636	-1.16945	0.242222	0.999811
DPF2	21.6411	0.369542	0.859171	0.430115	0.667112	0.999811
DPH3	8.06418	0.255009	1.11115	0.2295	0.81848	0.999811
DPH5	40.3884	-0.129963	0.628183	-0.206888	0.836098	0.999811
DPH6	10.6895	-6.09668	1.78231	-3.42066	0.000624705	0.093632
DPH7	9.18797	0.772651	1.48386	0.520704	0.602573	0.999811
DPM1	60.3578	-0.0532828	0.476909	-0.111725	0.911041	0.999811
DPM2	20.3887	-0.0897099	0.789938	-0.113566	0.909582	0.999811
DPP3	19.0941	0.64968	0.925742	0.701794	0.482808	0.999811
DPP4	198.691	0.699552	0.331211	2.1121	0.0346776	0.657271
DPP7	15.5956	-0.447757	0.834652	-0.536459	0.591641	0.999811
DPP8	7.58408	5.58135	2.54532	2.19279	0.0283225	0.613194
DPT	176.222	-2.02581	0.47071	-4.30372	1.6795e-05	0.00900643
DPYD	26.8968	-1.65786	1.14001	-1.45425	0.145878	0.999811
DPYSL2	86.4445	-0.0771171	0.695129	-0.110939	0.911664	0.999811
DPYSL3	17.1621	-1.34066	1.19576	-1.12118	0.262212	0.999811
DR1	10.6569	0.746646	1.0263	0.727512	0.466912	0.999811
DRAM1	14.3598	-1.12627	1.35884	-0.828846	0.407192	0.999811
DRAM2	50.0553	-0.128171	0.77059	-0.166328	0.867899	0.999811
DRG2	62.8364	0.322092	0.7385	0.436144	0.662732	0.999811
DROSHA	20.7884	0.48797	1.45626	0.335085	0.737561	0.999811
DSCR3	32.9996	-0.123468	0.597853	-0.206519	0.836386	0.999811
DSE	10.9586	0.241709	0.984628	0.245483	0.806083	0.999811
DSN1	10.1943	-2.06804	1.50753	-1.37181	0.170122	0.999811
DST	11.6218	0.0319809	1.13721	0.0281223	0.977565	0.999811
DSTN	258.991	0.115143	0.253928	0.453448	0.650226	0.999811
DSTNP2	66.2799	0.0304533	0.420584	0.0724072	0.942278	0.999811
DSTNP4	13.741	-0.222509	0.866922	-0.256665	0.797437	0.999811
DTD1	59.9639	0.00289002	0.528206	0.00547138	0.995634	0.999811
DTNBP1	27.1684	0.488927	0.671856	0.727726	0.466782	0.999811
DTWD1	20.709	-0.33837	0.761565	-0.444309	0.656819	0.999811
DTYMK	21.9924	-0.767409	0.888374	-0.863835	0.387679	0.999811
DUS2	20.3688	1.32244	0.901087	1.46761	0.14221	0.999811
DUSP11	77.3073	-0.968055	0.447815	-2.16173	0.0306392	0.637438
DUSP12	31.0164	0.545589	0.625676	0.871999	0.383209	0.999811
DUSP14	26.2048	0.511964	0.657981	0.778083	0.43652	0.999811
DUSP3	11.2228	-0.506408	1.02035	-0.496307	0.619678	0.999811
DUT	21.1413	0.348169	0.788345	0.441645	0.658746	0.999811
DUXAP8	18.493	0.75316	0.794182	0.948347	0.342953	0.999811
DUXAP9	13.9539	0.477993	0.911654	0.524314	0.60006	0.999811
DYM	90.5744	1.3752	0.556929	2.46926	0.0135392	0.432857
DYNC1I2P1	16.3611	0.474818	0.856766	0.554199	0.579443	0.999811
DYNC1LI1	44.3774	1.07043	1.18953	0.899876	0.368186	0.999811
DYNC1LI2	17.4585	-2.57092	1.40752	-1.82657	0.067765	0.902922
DYNC2LI1	46.4886	0.230223	0.721412	0.319128	0.749629	0.999811
DYNLL1	9.21843	-0.0486088	1.11624	-0.0435471	0.965265	0.999811
DYNLRB1	6.91735	-1.42802	1.47972	-0.965061	0.334514	0.999811
DYNLT1	16.0744	-1.20809	0.854808	-1.41329	0.157571	0.999811
DYNLT3	13.7622	-0.311011	0.90537	-0.343518	0.731209	0.999811
DYRK4	7.54773	-0.509717	1.30297	-0.391195	0.695653	0.999811
E2F4	8.99776	-0.489899	1.07231	-0.456865	0.647768	0.999811
EAPP	45.0948	-0.337346	0.596073	-0.565947	0.57143	0.999811
EBAG9	25.7464	0.284042	0.712724	0.398531	0.690239	0.999811
EBNA1BP2	31.3899	-0.579069	0.687062	-0.842819	0.39933	0.999811
EBP	38.6319	0.0985952	0.533101	0.184947	0.853271	0.999811
ECD	47.0064	-1.1796	0.671518	-1.75661	0.0789839	0.956064
ECE1	15.1471	1.24532	1.17091	1.06355	0.287534	0.999811
ECH1	34.4205	-0.0999045	0.632688	-0.157905	0.874532	0.999811
ECHDC1	40.5907	-1.05045	0.581663	-1.80594	0.0709278	0.917786
ECHDC2	18.0883	0.654269	1.55117	0.421791	0.673178	0.999811
ECHDC3	8.3643	2.77464	1.2978	2.13795	0.0325206	0.644077
ECHS1	192.797	-0.481961	0.353264	-1.36431	0.172471	0.999811
ECI2	71.1226	-0.0332066	0.497455	-0.066753	0.946778	0.999811
ECM1	88.5135	0.331538	0.345264	0.960246	0.336931	0.999811
ECM2	13.0941	-0.762248	1.52042	-0.501342	0.61613	0.999811
ECSIT	24.4343	0.777925	0.700843	1.10998	0.267006	0.999811
ECT2	13.4428	2.55691	1.89832	1.34693	0.178003	0.999811
EDA2R	15.9027	0.362834	1.12412	0.322772	0.746868	0.999811
EDC3	24.741	-0.195257	0.808531	-0.241496	0.809171	0.999811
EDEM2	40.0181	0.482678	0.711218	0.678663	0.497351	0.999811
EDF1	8.60874	0.00540558	1.07495	0.0050287	0.995988	0.999811
EDIL3	18.0785	2.15802	1.0214	2.1128	0.0346181	0.657271
EED	9.5914	-0.618296	2.08075	-0.297151	0.766351	0.999811
EEF1A1	1585.86	-0.0949158	0.150651	-0.630037	0.52867	0.999811
EEF1A1P11	23.8619	0.244804	0.707661	0.345934	0.729393	0.999811
EEF1A1P12	19.5797	0.0441156	0.74483	0.0592292	0.95277	0.999811
EEF1A1P13	988.004	-0.0709822	0.159052	-0.446283	0.655393	0.999811
EEF1A1P5	1691.63	-0.0815841	0.152773	-0.534021	0.593327	0.999811
EEF1A1P6	1691.57	-0.0827924	0.153327	-0.539975	0.589214	0.999811
EEF1AKMT1	7.22348	0.773738	2.05867	0.375844	0.707033	0.999811
EEF1B2P3	73.5544	0.0945356	0.387579	0.243913	0.807298	0.999811
EEF1B2P6	67.0162	0.0873322	0.405157	0.215551	0.829337	0.999811
EEF1D	9.66777	0.284445	1.02896	0.276439	0.782211	0.999811
EEF1DP1	103.743	-0.263295	0.384772	-0.684288	0.493793	0.999811
EEF2	843.834	0.341204	0.159049	2.14528	0.0319305	0.639331
EEF2KMT	18.0083	-0.658927	0.82118	-0.802415	0.422313	0.999811
EEFSEC	8.8953	-5.80453	1.95597	-2.9676	0.00300134	0.216016
EFCAB14	9.73227	-0.498596	1.32702	-0.375725	0.707121	0.999811
EFCAB7	14.3013	1.07368	1.411	0.760934	0.446696	0.999811
EFEMP1	741.163	0.136788	0.202773	0.674587	0.499938	0.999811
EFEMP2	66.9664	-0.66779	0.40397	-1.65307	0.0983172	0.999811
EFHC1	15.2424	-0.115164	0.925483	-0.124437	0.900969	0.999811
EFL1	30.2216	0.808391	1.405	0.575369	0.565042	0.999811
EFR3A	19.9105	2.52588	1.21249	2.08321	0.0372325	0.674491
EFTUD1P1	9.50983	1.02842	1.59184	0.646057	0.518243	0.999811
EFTUD2	65.7941	-0.333345	0.600228	-0.555363	0.578646	0.999811
EGR1	9.65586	0.185517	1.05009	0.176669	0.859769	0.999811
EGR2	7.25716	-0.764674	1.19248	-0.641246	0.521363	0.999811
EHBP1	27.51	1.35221	1.12882	1.19789	0.230959	0.999811
EHD1	7.99327	1.3598	1.37725	0.987326	0.323483	0.999811
EHD2	18.4536	-0.882765	0.794413	-1.11122	0.266475	0.999811
EI24	50.3077	-0.105593	0.717618	-0.147144	0.883018	0.999811
EI24P2	7.75217	0.283378	1.15212	0.245962	0.805711	0.999811
EID1	39.8983	0.0644296	0.520505	0.123783	0.901487	0.999811
EIF1	176.87	-0.5936	0.341121	-1.74015	0.0818335	0.963578
EIF1AX	8.8184	0.766511	1.17314	0.653383	0.513509	0.999811
EIF1AXP1	19.8055	-0.0612169	0.76862	-0.0796452	0.936519	0.999811
EIF1B	18.9213	-0.655214	0.785568	-0.834064	0.404245	0.999811
EIF1P3	16.8793	-1.18905	0.988084	-1.20339	0.228826	0.999811
EIF1P7	33.6246	-0.696652	0.627196	-1.11074	0.26668	0.999811
EIF2A	122.266	0.43539	0.395176	1.10176	0.270565	0.999811
EIF2AK1	10.4353	0.60015	0.996993	0.60196	0.547201	0.999811
EIF2AK2	9.27258	-0.782489	2.00205	-0.390843	0.695913	0.999811
EIF2AK4	22.0762	0.664364	0.893619	0.743453	0.457207	0.999811
EIF2B1	72.535	-0.127582	0.537584	-0.237325	0.812404	0.999811
EIF2B2	9.35407	0.524382	1.44681	0.36244	0.717023	0.999811
EIF2B3	71.829	0.369557	0.476797	0.775084	0.43829	0.999811
EIF2B4	7.77167	-0.828298	1.30423	-0.635084	0.525374	0.999811
EIF2B5	7.46422	-1.6609	1.47933	-1.12274	0.261547	0.999811
EIF2D	110.854	0.0579345	0.443154	0.130732	0.895987	0.999811
EIF2S1	102.741	0.488206	0.360625	1.35378	0.175807	0.999811
EIF2S2P4	95.9162	-0.0694406	0.407846	-0.170261	0.864804	0.999811
EIF2S3	22.6721	0.655604	0.668877	0.980157	0.327009	0.999811
EIF2S3L	34.9604	-0.0257557	0.581478	-0.0442934	0.964671	0.999811
EIF3A	20.8461	0.805152	0.808823	0.995461	0.319512	0.999811
EIF3B	14.6636	0.0852528	1.08533	0.0785501	0.93739	0.999811
EIF3C	279.892	0.0932386	0.215624	0.432413	0.665442	0.999811
EIF3CL	271.094	0.129211	0.217931	0.5929	0.553248	0.999811
EIF3D	506.659	-0.07975	0.254721	-0.313088	0.754214	0.999811
EIF3FP3	121.844	0.165914	0.326482	0.508188	0.611322	0.999811
EIF3G	76.3189	-0.287786	0.391804	-0.734515	0.462635	0.999811
EIF3H	447.147	-0.203348	0.283907	-0.716249	0.473837	0.999811
EIF3I	168.2	0.37046	0.301027	1.23065	0.218452	0.999811
EIF3IP1	10.2892	1.2256	1.08989	1.12452	0.260791	0.999811
EIF3J	9.2744	0.988104	1.02078	0.967985	0.333052	0.999811
EIF3K	62.057	-0.611673	0.42304	-1.4459	0.148205	0.999811
EIF3KP1	12.691	-0.765566	0.946291	-0.809017	0.418505	0.999811
EIF3L	19.6983	-0.207995	0.790671	-0.263062	0.792503	0.999811
EIF3LP1	111.593	0.110069	0.323148	0.340614	0.733394	0.999811
EIF3LP2	85.385	-0.052374	0.362776	-0.14437	0.885208	0.999811
EIF3LP3	74.2361	0.034332	0.379919	0.0903668	0.927996	0.999811
EIF3M	352.336	-0.1197	0.262708	-0.455638	0.64865	0.999811
EIF4A1P10	88.3936	0.0771879	0.43346	0.178074	0.858665	0.999811
EIF4A1P2	33.1374	0.0373333	0.669246	0.0557841	0.955514	0.999811
EIF4A1P4	37.8277	0.305183	0.593507	0.514204	0.60711	0.999811
EIF4A2	8.53741	0.99682	1.16613	0.854812	0.392655	0.999811
EIF4A2P4	36.304	1.00073	0.553119	1.80924	0.0704131	0.916919
EIF4A3	72.6155	-0.230425	0.487289	-0.472871	0.636306	0.999811
EIF4B	7.69733	-0.295744	1.20499	-0.245433	0.806121	0.999811
EIF4BP6	29.7132	0.597186	0.602367	0.991398	0.321491	0.999811
EIF4BP7	8.21509	-0.139423	1.0909	-0.127805	0.898304	0.999811
EIF4E2	40.8749	-0.257853	0.667898	-0.386067	0.699447	0.999811
EIF4EBP1	62.4783	-0.275423	0.420714	-0.654655	0.51269	0.999811
EIF4ENIF1	10.7863	-1.39698	1.91864	-0.728107	0.466548	0.999811
EIF4EP2	15.062	0.211652	0.815068	0.259674	0.795115	0.999811
EIF4G1	8.9756	0.660677	1.08428	0.609325	0.542309	0.999811
EIF4G2	247.07	0.160193	0.267058	0.599846	0.548609	0.999811
EIF4G3	38.3175	-0.302524	0.917823	-0.32961	0.741695	0.999811
EIF4H	17.8609	0.61358	0.854503	0.718055	0.472724	0.999811
EIF4HP1	16.6072	0.709981	0.911022	0.779323	0.435789	0.999811
EIF5	47.0454	0.782215	0.503087	1.55483	0.119987	0.999811
EIF5A	19.6052	0.0749171	0.796415	0.0940678	0.925055	0.999811
EIF5AL1	79.5905	0.0345413	0.39054	0.0884449	0.929523	0.999811
EIF5AP4	80.4538	0.0264183	0.396914	0.0665591	0.946933	0.999811
EIF5B	12.8215	0.19897	0.90281	0.220389	0.825568	0.999811
EIF6	33.6954	-0.0420978	0.582531	-0.072267	0.942389	0.999811
ELAC2	8.78415	0.146661	1.46556	0.100071	0.920288	0.999811
ELF1	15.567	1.18584	1.39918	0.847526	0.396702	0.999811
ELF2	9.37236	-0.757759	2.18625	-0.346602	0.72889	0.999811
ELF4	8.09379	-0.0164029	2.02882	-0.00808496	0.993549	0.999811
ELK3	20.5002	1.13235	0.866637	1.30661	0.191346	0.999811
ELMO2	36.7782	0.0656566	0.716465	0.0916397	0.926984	0.999811
ELMOD2	22.5541	-0.00807352	0.761641	-0.0106002	0.991542	0.999811
ELMOD3	21.3085	0.58352	0.887271	0.657657	0.510759	0.999811
ELN	13.3692	-1.40689	1.19079	-1.18148	0.237411	0.999811
ELOF1	12.5758	-0.796773	1.00404	-0.793568	0.427447	0.999811
ELOVL1	30.1199	-0.0306995	0.619422	-0.0495616	0.960472	0.999811
ELOVL5	115.892	0.188521	0.341733	0.551661	0.581181	0.999811
ELOVL6	9.50854	0.258428	1.21855	0.212078	0.832046	0.999811
ELP2	155.623	0.319405	0.330518	0.966379	0.333855	0.999811
ELP3	55.5157	0.705267	0.496957	1.41917	0.155849	0.999811
ELP4	19.0261	0.00633755	1.02194	0.00620147	0.995052	0.999811
ELP5	19.0382	0.810573	0.730442	1.1097	0.267128	0.999811
ELP6	39.5286	0.513619	0.554513	0.926252	0.354315	0.999811
EMC1	98.3173	-0.0224274	0.644147	-0.0348172	0.972226	0.999811
EMC2	61.8458	-0.935355	0.660175	-1.41683	0.156533	0.999811
EMC3	89.9035	0.023765	0.427277	0.0556197	0.955645	0.999811
EMC4	60.9174	-0.112113	0.493442	-0.227205	0.820264	0.999811
EMC7	132.708	-0.541347	0.353785	-1.53016	0.125978	0.999811
EMC8	10.947	0.740395	1.04506	0.708474	0.478651	0.999811
EMD	8.56622	-0.0800032	1.09203	-0.0732613	0.941598	0.999811
EMG1	9.82749	-0.34613	1.01404	-0.341339	0.732848	0.999811
EML1	11.0781	-6.12219	2.13352	-2.86952	0.00411091	0.24612
EML2	10.8032	3.13067	2.05269	1.52515	0.127221	0.999811
EMP1	155.687	0.278752	0.323161	0.862582	0.388367	0.999811
EMP3	38.3873	-0.258846	0.694154	-0.372894	0.709227	0.999811
ENDOV	19.1668	-0.839367	0.988379	-0.849236	0.39575	0.999811
ENG	11.9107	-0.223447	1.16841	-0.19124	0.848338	0.999811
ENO1	258.864	-0.0399398	0.231236	-0.172723	0.862869	0.999811
ENOPH1	22.3269	0.0926532	0.69373	0.133558	0.893752	0.999811
ENOSF1	8.39558	-1.55243	2.13112	-0.728458	0.466333	0.999811
ENOX1	13.4915	1.66119	1.23752	1.34235	0.179483	0.999811
ENOX2	18.6565	0.785827	1.27124	0.618156	0.536473	0.999811
ENPP2	140.573	1.16509	0.418974	2.78082	0.00542215	0.262531
ENSA	16.5834	0.783042	0.839695	0.932532	0.351062	0.999811
ENSAP2	7.43363	0.835497	1.17617	0.710352	0.477486	0.999811
ENTPD4	17.5234	-0.709527	1.58826	-0.446731	0.655069	0.999811
ENTPD6	21.7191	0.866858	1.0735	0.807509	0.419373	0.999811
ENY2	11.5048	2.19821	1.25714	1.74858	0.0803636	0.958778
EPB41L2	39.2495	0.122546	0.693863	0.176614	0.859811	0.999811
EPB41L3	11.1788	-0.702907	1.59861	-0.4397	0.660155	0.999811
EPHX1	89.6317	0.559423	0.514341	1.08765	0.27675	0.999811
EPRS	88.0357	0.922502	0.577917	1.59625	0.110432	0.999811
EPS15	35.5267	-0.329702	0.669082	-0.492768	0.622177	0.999811
EPS15L1	22.1383	0.806622	1.43808	0.560904	0.574863	0.999811
EPS8	115.535	0.19111	0.581415	0.328698	0.742384	0.999811
ERAL1	9.5366	-0.112954	1.16861	-0.0966568	0.922999	0.999811
ERAP1	8.35077	0.362566	2.01477	0.179954	0.857189	0.999811
ERCC1	99.8459	-1.11639	0.56141	-1.98854	0.0467516	0.74852
ERCC2	8.55808	-1.09057	1.55962	-0.699254	0.484393	0.999811
ERCC3	30.1302	0.212767	0.810901	0.262384	0.793026	0.999811
ERCC5	8.08211	0.15307	1.5476	0.0989082	0.921211	0.999811
ERCC8	38.7411	-1.82315	0.651061	-2.80028	0.00510587	0.256546
ERGIC1	85.3324	-0.52111	0.551562	-0.94479	0.344766	0.999811
ERGIC2	61.9138	-0.060456	0.529613	-0.114151	0.909118	0.999811
ERGIC3	268.699	-0.12154	0.352571	-0.344726	0.7303	0.999811
ERH	65.6124	-0.0739223	0.423217	-0.174668	0.861341	0.999811
ERI1	7.91552	0.934396	1.31091	0.712782	0.475981	0.999811
ERI3	65.2192	-1.07558	0.543748	-1.97808	0.0479195	0.750069
ERLEC1	67.6829	-0.17852	0.535716	-0.333235	0.738957	0.999811
ERLIN1	41.5746	0.573829	0.80826	0.709956	0.477732	0.999811
ERLIN2	10.6076	0.381853	1.96295	0.19453	0.845761	0.999811
ERMARD	27.9106	0.400653	0.778583	0.514593	0.606837	0.999811
ERO1A	18.4633	1.02018	1.25254	0.814489	0.415365	0.999811
ERP29	93.0789	-0.0274468	0.392425	-0.0699415	0.94424	0.999811
ERP29P1	10.4871	-0.457819	0.988766	-0.463021	0.643349	0.999811
ERP44	187.079	-0.836128	0.397357	-2.10422	0.035359	0.658469
ESD	239.117	-0.223784	0.230835	-0.969455	0.332318	0.999811
ESYT1	11.5547	-0.254112	1.03014	-0.246678	0.805157	0.999811
ESYT2	14.2453	0.134961	0.906437	0.148891	0.881639	0.999811
ETF1	12.8307	0.378138	0.929087	0.406999	0.684008	0.999811
ETFA	124.341	-0.739882	0.418572	-1.76763	0.0771222	0.946435
ETFB	38.562	-0.137069	0.658654	-0.208105	0.835147	0.999811
ETFDH	36.3798	0.714909	0.81341	0.878904	0.379453	0.999811
ETHE1	29.6329	-0.249346	0.591632	-0.421454	0.673423	0.999811
ETNK1	6.89017	0.866905	1.53933	0.563172	0.573317	0.999811
ETS2	8.81437	1.58382	2.801	0.565448	0.571769	0.999811
ETV5	9.4315	-2.21476	1.45461	-1.52258	0.127864	0.999811
EVA1A	22.3192	0.624335	0.713292	0.875286	0.381418	0.999811
EVC2	10.136	0.8768	2.70526	0.32411	0.745855	0.999811
EXD2	11.4741	0.329241	1.57354	0.209236	0.834264	0.999811
EXOC1	36.6251	-0.956773	0.659744	-1.45022	0.146997	0.999811
EXOC2	29.7071	1.67531	1.04929	1.59661	0.110353	0.999811
EXOC3	28.0275	-0.417502	1.32964	-0.313997	0.753524	0.999811
EXOC4	52.9299	0.535191	0.530026	1.00974	0.312618	0.999811
EXOC7	23.9073	-0.461707	0.702054	-0.657651	0.510762	0.999811
EXOSC1	17.1806	-0.876114	1.36012	-0.644143	0.519483	0.999811
EXOSC10	55.439	0.762166	0.484871	1.5719	0.115975	0.999811
EXOSC2	9.03767	-1.89735	1.38701	-1.36795	0.171328	0.999811
EXOSC5	15.5249	-0.840991	1.09748	-0.766292	0.443502	0.999811
EXOSC7	56.5331	0.243062	0.495288	0.490749	0.623604	0.999811
EXOSC8	28.9661	-0.220075	0.671173	-0.327896	0.74299	0.999811
EXOSC9	21.6246	0.802776	0.772533	1.03915	0.298736	0.999811
EXT1	31.7984	1.14826	0.642039	1.78846	0.0737023	0.933905
EXT2	55.7291	0.169233	0.624653	0.270924	0.78645	0.999811
EXTL2	16.4479	0.888385	1.06967	0.830519	0.406245	0.999811
EZH2	7.95584	1.35192	2.85212	0.474004	0.635497	0.999811
EZR	9.39837	-5.88523	1.97049	-2.98669	0.00282017	0.205757
F2R	11.51	0.398593	0.93899	0.424491	0.671208	0.999811
F3	10.6824	0.162574	1.30893	0.124204	0.901154	0.999811
FABP3	28.4092	3.71022	0.715444	5.18589	2.14981e-07	0.000262103
FADS1	80.815	1.08576	0.380942	2.85019	0.00436933	0.24612
FADS2	99.7749	0.997622	0.355929	2.80287	0.00506506	0.256546
FADS3	17.0037	0.933754	0.944334	0.988796	0.322763	0.999811
FAF1	18.1473	-0.347001	1.86926	-0.185636	0.852731	0.999811
FAF2	14.0891	-0.691426	1.26163	-0.548043	0.583662	0.999811
FAH	66.5045	0.446483	0.554251	0.80556	0.420497	0.999811
FAHD1	6.70705	-0.851498	1.25463	-0.678684	0.497338	0.999811
FAHD2A	15.9166	-0.341368	0.877335	-0.389096	0.697205	0.999811
FAHD2B	8.40671	-0.217231	1.11079	-0.195565	0.844951	0.999811
FAHD2CP	7.23822	-0.419185	1.16573	-0.359589	0.719154	0.999811
FAIM2	10.64	0.578817	0.969277	0.597164	0.550398	0.999811
FAM103A2P	9.01345	-0.0256646	1.04003	-0.0246769	0.980313	0.999811
FAM104A	9.24329	1.11954	1.1355	0.985942	0.324162	0.999811
FAM114A1	65.0093	-0.327266	0.538748	-0.607456	0.543548	0.999811
FAM114A2	29.5065	-0.148975	0.627083	-0.237568	0.812216	0.999811
FAM118B	57.0476	-0.5506	0.617265	-0.891999	0.372394	0.999811
FAM120A	7.10146	1.26319	1.32892	0.95054	0.341838	0.999811
FAM120B	26.9255	0.575443	1.23832	0.464697	0.642148	0.999811
FAM126A	29.967	-2.69823	1.15925	-2.32756	0.0199352	0.50143
FAM127A	27.7143	0.602473	0.638771	0.943175	0.345592	0.999811
FAM127B	7.25286	-0.285571	1.30966	-0.218049	0.827391	0.999811
FAM129A	9.19975	-2.64966	1.29511	-2.04589	0.0407673	0.704957
FAM134C	9.13173	-0.00249951	1.42091	-0.00175909	0.998596	0.999811
FAM136A	11.4824	-0.46679	1.00539	-0.464288	0.642442	0.999811
FAM156A	10.5619	-1.64755	1.14444	-1.43961	0.149977	0.999811
FAM156B	10.6294	-1.65184	1.16263	-1.42077	0.155382	0.999811
FAM162A	10.7315	-0.600447	1.0267	-0.584831	0.558661	0.999811
FAM173B	6.73993	0.114384	1.19048	0.0960822	0.923455	0.999811
FAM175B	13.7031	-0.908722	0.961828	-0.944787	0.344768	0.999811
FAM177A1	22.4734	-0.280094	0.809539	-0.345992	0.729349	0.999811
FAM188A	27.6593	-0.859286	1.18516	-0.725041	0.468427	0.999811
FAM192A	12.8077	0.795278	0.914471	0.869658	0.384487	0.999811
FAM198B	15.1886	0.599181	1.06389	0.563197	0.573301	0.999811
FAM200B	8.99926	0.510453	1.29163	0.3952	0.692695	0.999811
FAM204A	29.5271	-0.209969	0.640527	-0.327807	0.743057	0.999811
FAM204BP	7.62936	-0.221443	1.23038	-0.17998	0.857168	0.999811
FAM206A	17.8921	-0.525093	0.767126	-0.684493	0.493664	0.999811
FAM20A	23.3693	0.14341	0.707823	0.202607	0.839442	0.999811
FAM213A	14.0395	-0.34274	1.19618	-0.286529	0.774473	0.999811
FAM216A	14.0408	-0.479095	0.909007	-0.527053	0.598156	0.999811
FAM21A	30.0015	1.57306	0.808879	1.94474	0.0518068	0.778557
FAM21C	32.0162	1.14414	0.61767	1.85235	0.0639749	0.887319
FAM220A	7.6197	1.25892	1.16506	1.08056	0.279893	0.999811
FAM227B	7.30149	0.650085	1.58993	0.408876	0.682631	0.999811
FAM229B	7.622	-1.50033	1.88104	-0.797608	0.425098	0.999811
FAM32A	50.1654	-0.037409	0.503704	-0.0742679	0.940797	0.999811
FAM3C2	9.45361	0.136373	1.00175	0.136134	0.891715	0.999811
FAM49B	14.7487	0.638282	0.823889	0.774718	0.438506	0.999811
FAM57A	11.7764	-0.0181285	1.03258	-0.0175565	0.985993	0.999811
FAM69A	16.6006	-0.11956	0.805876	-0.148361	0.882058	0.999811
FAM86B1	6.7172	-0.82062	1.28806	-0.637099	0.52406	0.999811
FAM86DP	7.41394	-2.05722	1.5629	-1.31628	0.188079	0.999811
FAM92A	11.6343	-0.352965	1.03437	-0.341235	0.732926	0.999811
FAM92A1P1	11.0465	0.187189	0.980206	0.190969	0.84855	0.999811
FAM96A	32.361	0.20504	0.642527	0.319115	0.749639	0.999811
FAM98A	14.9629	1.15791	0.837622	1.38238	0.166856	0.999811
FANCC	9.94429	-1.20958	2.88806	-0.418823	0.675346	0.999811
FANCL	16.3149	-0.111326	1.95236	-0.057021	0.954528	0.999811
FAP	822.14	0.130732	0.209456	0.624149	0.53253	0.999811
FAR1	22.775	1.18654	0.897402	1.3222	0.186102	0.999811
FARP1	7.0827	-1.76538	1.47933	-1.19336	0.232728	0.999811
FARP2	9.22414	2.1126	2.26764	0.931631	0.351527	0.999811
FARS2	9.28723	-5.91387	2.40651	-2.45745	0.0139927	0.436466
FARSA	13.2213	0.243073	0.878747	0.276613	0.782077	0.999811
FARSB	81.1558	-0.0478824	0.560563	-0.0854185	0.931929	0.999811
FARSBP1	10.2163	0.626849	1.01906	0.615127	0.538471	0.999811
FAS	91.8825	0.259653	0.419379	0.619138	0.535825	0.999811
FASTKD2	38.6401	-0.522216	0.779692	-0.669772	0.503003	0.999811
FAT1	7.63086	0.563268	1.11472	0.505299	0.613349	0.999811
FBL	33.7173	-1.29778	0.607328	-2.13686	0.0326091	0.644077
FBLN1	184.655	-0.00745512	0.341756	-0.0218141	0.982596	0.999811
FBLN2	67.9079	-0.349269	0.407479	-0.857146	0.391364	0.999811
FBLN5	333.605	-0.405289	0.28431	-1.42552	0.154007	0.999811
FBN1	79.9655	0.0133296	0.573056	0.0232605	0.981442	0.999811
FBN2	6.86704	3.13795	1.8465	1.69941	0.0892427	0.994444
FBXL12	11.271	-1.36369	1.03674	-1.31536	0.188388	0.999811
FBXL4	7.85087	2.16665	1.99387	1.08666	0.277188	0.999811
FBXL5	69.6789	-0.123466	0.431749	-0.285967	0.774903	0.999811
FBXO18	26.4907	1.3804	0.730385	1.88996	0.0587634	0.845108
FBXO21	7.57776	-3.9652	2.12391	-1.86693	0.0619108	0.873738
FBXO22	45.2817	-0.546179	0.607437	-0.899154	0.368571	0.999811
FBXO25	18.528	-1.94439	1.1639	-1.67058	0.094804	0.999811
FBXO3	31.0551	1.18296	0.739511	1.59965	0.109676	0.999811
FBXO38	18.3938	-0.193107	0.937147	-0.206058	0.836745	0.999811
FBXO4	10.5234	1.51732	1.23164	1.23195	0.217968	0.999811
FBXO42	16.3177	-1.2414	0.899367	-1.38031	0.167491	0.999811
FBXO44	17.228	0.773031	0.990858	0.780163	0.435295	0.999811
FBXO6	14.7338	0.970653	0.862111	1.1259	0.260207	0.999811
FBXO7	80.8098	-0.158294	0.456008	-0.347129	0.728494	0.999811
FBXO8	14.6445	0.335488	0.981201	0.341915	0.732415	0.999811
FBXO9	10.9089	0.00884142	2.02511	0.0043659	0.996517	0.999811
FBXW11	6.92145	1.14492	1.87181	0.611666	0.540759	0.999811
FBXW2	15.7061	0.150984	0.981633	0.153809	0.87776	0.999811
FCF1	7.91506	0.280638	1.21774	0.230458	0.817736	0.999811
FCGRT	45.2409	-0.446048	0.495996	-0.899297	0.368494	0.999811
FDFT1	415.856	1.13771	0.195655	5.81489	6.06746e-09	1.07718e-05
FDPS	90.8664	1.26039	0.454971	2.77027	0.005601	0.266348
FDPSP1	73.2938	1.21352	0.425502	2.85198	0.00434482	0.24612
FDPSP5	38.0767	1.3133	0.603984	2.17439	0.0296755	0.629689
FDPSP8	22.0871	1.15812	0.795903	1.45511	0.14564	0.999811
FDX1	8.79753	-0.335123	1.08847	-0.307883	0.758171	0.999811
FECH	26.5838	0.871502	0.767589	1.13538	0.256218	0.999811
FERMT2	50.6827	0.195893	1.02632	0.190869	0.848628	0.999811
FEZ1	170.573	0.117422	0.291949	0.402201	0.687536	0.999811
FEZ2	8.78509	-3.45445	1.51607	-2.27855	0.0226938	0.53481
FGD5-AS1	7.85031	0.26828	1.18105	0.227154	0.820304	0.999811
FGF7	70.3841	-0.12126	0.471014	-0.257445	0.796835	0.999811
FGF7P2	13.8197	-0.0659837	0.893572	-0.0738426	0.941136	0.999811
FGF7P4	13.6232	0.164679	0.947029	0.173891	0.861951	0.999811
FGF7P7	10.5402	0.225921	1.03174	0.21897	0.826674	0.999811
FGFR1	35.5597	0.321843	0.711681	0.45223	0.651103	0.999811
FGFR1OP2	34.2021	-0.936159	0.660887	-1.41652	0.156624	0.999811
FGGY	26.5699	-1.98091	1.0539	-1.87959	0.0601633	0.857898
FH	72.2079	-0.357486	0.414132	-0.863218	0.388017	0.999811
FHL1	39.2818	0.561362	0.691265	0.812079	0.416746	0.999811
FHL2	146.492	-0.0343803	0.324327	-0.106005	0.915578	0.999811
FHL3	7.73166	-1.49118	1.26626	-1.17763	0.238945	0.999811
FIBIN	7.9711	-0.00926522	1.13161	-0.00818766	0.993467	0.999811
FIBP	53.37	0.247189	0.491067	0.50337	0.614704	0.999811
FIG4	51.7583	0.937911	0.589416	1.59126	0.111552	0.999811
FIP1L1	16.4984	0.6454	1.09479	0.58952	0.555513	0.999811
FIS1	13.7487	-1.03234	1.07165	-0.963324	0.335385	0.999811
FKBP10	30.9056	0.376978	0.601653	0.62657	0.530941	0.999811
FKBP11	7.88197	0.407352	1.3022	0.312819	0.754418	0.999811
FKBP14	11.6029	-0.162461	0.95728	-0.169711	0.865237	0.999811
FKBP15	21.4762	1.64866	1.47851	1.11508	0.264814	0.999811
FKBP1A	48.3314	-0.0162198	0.536459	-0.0302349	0.97588	0.999811
FKBP1AP1	9.00786	0.129881	1.12641	0.115305	0.908204	0.999811
FKBP1C	35.3565	0.00407777	0.578048	0.00705437	0.994371	0.999811
FKBP3	93.469	-0.192489	0.579298	-0.332281	0.739677	0.999811
FKBP5	17.1806	1.11752	1.2439	0.898401	0.368972	0.999811
FKBP7	55.611	-0.0953832	0.500448	-0.190596	0.848842	0.999811
FKBP8	18.5588	0.154778	0.738303	0.20964	0.833949	0.999811
FKBP9	248.172	-0.13766	0.287554	-0.478726	0.632133	0.999811
FKBP9P1	108.732	-0.209401	0.380961	-0.549666	0.582549	0.999811
FKTN	8.59645	0.0654676	1.64288	0.0398493	0.968213	0.999811
FLAD1	15.3084	-0.775524	0.855389	-0.906633	0.364601	0.999811
FLII	8.16448	-1.14687	1.45914	-0.785989	0.431874	0.999811
FLNA	18.9888	-0.995868	0.769328	-1.29446	0.195505	0.999811
FLNB	11.609	0.79841	1.38568	0.576187	0.564489	0.999811
FLOT2	10.5139	-0.73946	1.06274	-0.695803	0.486552	0.999811
FLYWCH2	9.69295	-2.60814	1.33157	-1.9587	0.0501483	0.774173
FMO1	16.6829	-0.0460531	1.09763	-0.0419567	0.966533	0.999811
FN1	6501.21	-0.147878	0.143865	-1.02789	0.304002	0.999811
FN3KRP	12.7328	0.296303	1.43077	0.207093	0.835937	0.999811
FNBP1L	21.1541	1.85782	1.15672	1.6061	0.108251	0.999811
FNBP4	13.3962	0.246456	1.78779	0.137855	0.890355	0.999811
FNDC3A	8.1045	0.847353	1.82426	0.464492	0.642295	0.999811
FNDC3B	33.1612	0.00944557	1.05181	0.00898029	0.992835	0.999811
FNTA	7.59949	-0.084794	1.19377	-0.0710305	0.943373	0.999811
FOCAD	12.3374	-1.11898	1.98965	-0.562401	0.573843	0.999811
FOPNL	43.7159	-0.143902	0.627952	-0.229161	0.818744	0.999811
FOS	23.6606	-0.106405	0.767695	-0.138603	0.889764	0.999811
FOSL1	9.96065	-0.84741	1.41836	-0.597458	0.550202	0.999811
FOSL2	7.50866	-1.43531	1.30039	-1.10375	0.269702	0.999811
FOXP1	8.10966	-4.29522	1.79795	-2.38895	0.0168966	0.476845
FOXRED1	7.90166	0.810039	1.12184	0.722063	0.470256	0.999811
FRA10AC1	66.2032	-0.754815	0.517506	-1.45856	0.144686	0.999811
FRG1	47.2879	0.00797369	0.680316	0.0117206	0.990649	0.999811
FRG1BP	16.2213	-0.0947523	0.830888	-0.114037	0.909208	0.999811
FRG1CP	16.1665	1.01922	1.08898	0.935941	0.349304	0.999811
FRG1FP	10.5	0.469977	1.03638	0.453478	0.650205	0.999811
FRG1HP	14.0623	0.0946038	0.968638	0.0976669	0.922197	0.999811
FRG1JP	8.40368	-0.31009	1.11852	-0.277232	0.781602	0.999811
FRMD6	65.4933	1.19571	0.548003	2.18194	0.0291141	0.622738
FSTL1	541.603	0.295498	0.202789	1.45717	0.14507	0.999811
FTH1	7.03216	0.0772389	1.23338	0.0626239	0.950066	0.999811
FTH1P12	134.588	-0.0817848	0.308684	-0.264946	0.791051	0.999811
FTH1P16	481.81	-0.070353	0.172695	-0.407383	0.683726	0.999811
FTH1P20	1846.65	-0.0437523	0.108064	-0.404874	0.68557	0.999811
FTH1P23	20.9822	0.423281	0.702819	0.602261	0.547	0.999811
FTH1P3	156.165	-0.0302668	0.271845	-0.111338	0.911348	0.999811
FTH1P4	23.4641	-0.0846434	0.677622	-0.124912	0.900593	0.999811
FTH1P5	12.479	-0.517954	0.95232	-0.543887	0.586519	0.999811
FTH1P7	1849.88	-0.0462358	0.108007	-0.428081	0.668592	0.999811
FTH1P8	912.58	-0.0625016	0.135778	-0.460321	0.645286	0.999811
FTL	2312.71	0.0681688	0.133507	0.510602	0.60963	0.999811
FTLP2	33.0802	0.102745	0.575157	0.178639	0.858221	0.999811
FTLP3	815.214	0.127576	0.177636	0.718187	0.472642	0.999811
FTO	53.932	0.229106	0.511872	0.447586	0.654452	0.999811
FTSJ1	40.755	-0.441154	0.580856	-0.75949	0.44756	0.999811
FUBP1	34.5365	-1.58415	0.690651	-2.29371	0.0218073	0.521247
FUBP3	42.7972	0.0929702	0.557268	0.166832	0.867502	0.999811
FUCA2	69.734	-0.228208	0.39728	-0.574427	0.565679	0.999811
FUNDC1	8.26552	-0.178786	1.62495	-0.110026	0.912389	0.999811
FUNDC2P1	19.1388	0.0310963	0.728265	0.0426992	0.965941	0.999811
FUT10	9.57819	1.16675	1.70071	0.686039	0.492689	0.999811
FUT8	42.3829	0.206115	0.733138	0.281142	0.778602	0.999811
FXR1	14.947	0.127779	0.934398	0.13675	0.891228	0.999811
FXYD5	177.269	-0.470723	0.338773	-1.3895	0.164682	0.999811
FYN	10.3765	1.40058	1.37212	1.02075	0.307375	0.999811
FYTTD1	55.4347	-0.228347	0.506385	-0.450936	0.652036	0.999811
G3BP1	31.5792	0.0304048	0.647092	0.0469868	0.962524	0.999811
G3BP2	45.1957	0.811108	0.543507	1.49236	0.135605	0.999811
G6PC3	39.2232	-0.49162	0.562887	-0.87339	0.382451	0.999811
G6PD	23.0936	0.611766	0.766484	0.798146	0.424786	0.999811
GAA	28.5349	-0.0194184	0.623645	-0.0311369	0.97516	0.999811
GABARAPL1	16.6098	0.11031	0.870856	0.126668	0.899203	0.999811
GABARAPL2	131.856	-0.576869	0.319702	-1.8044	0.0711689	0.917786
GABPB1	8.90594	-0.703587	1.20862	-0.582139	0.560473	0.999811
GABPB2	7.48416	4.20216	1.89431	2.21831	0.0265337	0.589404
GADD45A	8.82006	0.560375	1.05713	0.530093	0.596048	0.999811
GALC	18.9601	-0.464366	2.01154	-0.230851	0.81743	0.999811
GALK2	32.6175	-1.65212	0.697848	-2.36745	0.0179114	0.485068
GALM	44.6016	1.1994	0.694087	1.72803	0.0839824	0.963578
GALNS	54.6708	-0.198443	0.502803	-0.394674	0.693084	0.999811
GALNT1	12.9141	-0.389103	1.46227	-0.266095	0.790166	0.999811
GALNT11	37.1464	1.47816	0.637927	2.31713	0.0204964	0.505389
GALNT2	27.5757	2.48598	1.07922	2.30349	0.0212511	0.514469
GALNT5	9.0082	2.90003	1.2676	2.2878	0.0221489	0.52663
GAMT	17.8744	0.131856	0.874921	0.150707	0.880207	0.999811
GANAB	39.3953	0.00279964	0.537755	0.00520616	0.995846	0.999811
GAPDH	174.959	0.214327	0.300134	0.714105	0.475162	0.999811
GAPDHP1	147.833	0.089202	0.273663	0.325956	0.744457	0.999811
GAPDHP65	14.5039	-0.327425	0.887562	-0.368904	0.712199	0.999811
GAPVD1	9.07201	1.04431	1.44183	0.724297	0.468883	0.999811
GARS	685.723	-0.496391	0.227444	-2.18247	0.0290747	0.622738
GART	39.9588	-0.560681	1.4072	-0.398438	0.690308	0.999811
GAS6	15.836	0.0925045	0.913358	0.10128	0.919329	0.999811
GAS6-AS2	11.506	1.08193	1.0638	1.01705	0.30913	0.999811
GATB	55.6949	0.820541	0.480722	1.70689	0.0878421	0.984941
GBA	11.7658	0.0607833	1.03664	0.0586347	0.953243	0.999811
GBAS	66.385	-0.263104	0.427865	-0.614922	0.538606	0.999811
GBE1	227.301	0.206435	0.451688	0.457029	0.64765	0.999811
GBP1	15.3277	0.530637	0.866276	0.61255	0.540174	0.999811
GBP2	56.952	-0.637383	0.747671	-0.852491	0.393942	0.999811
GBP3	15.5482	-0.339912	1.29687	-0.262101	0.793244	0.999811
GCFC2	16.1772	2.05891	1.39784	1.47292	0.140773	0.999811
GCLC	6.63645	-5.39362	2.02752	-2.6602	0.00780941	0.327503
GCLM	6.78029	-0.515429	1.45119	-0.355177	0.722457	0.999811
GDAP2	8.9171	-4.40243	1.76897	-2.4887	0.012821	0.429463
GDE1	17.9495	-6.84651	1.64802	-4.15439	3.26156e-05	0.0133624
GDI1	29.0452	0.828498	0.719134	1.15208	0.24929	0.999811
GDI2	76.8898	-0.211186	0.444467	-0.475145	0.634684	0.999811
GDI2P1	48.6357	0.366187	0.486611	0.752526	0.451735	0.999811
GDI2P2	19.9212	-0.473483	0.721988	-0.655804	0.51195	0.999811
GEM	15.7328	-0.136284	0.961394	-0.141757	0.887272	0.999811
GEMIN8	14.7003	0.420896	1.03388	0.407102	0.683933	0.999811
GFM1	40.1817	-0.572518	0.547197	-1.04627	0.295434	0.999811
GFM2	23.9896	0.793494	1.2771	0.621324	0.534387	0.999811
GFPT1	91.1784	-0.0597993	0.467627	-0.127878	0.898245	0.999811
GFPT2	88.7027	0.737942	0.473158	1.55961	0.118852	0.999811
GGA1	26.8164	-1.28967	1.15583	-1.11579	0.264511	0.999811
GGA2	17.7447	1.77209	1.35229	1.31044	0.190048	0.999811
GGCT	8.1683	-0.256034	1.2914	-0.198261	0.842841	0.999811
GGCX	13.7296	-2.59993	1.31526	-1.97674	0.0480712	0.750069
GGH	15.1837	-1.75682	1.18082	-1.48779	0.136805	0.999811
GGNBP2	28.8958	-0.483402	0.753151	-0.64184	0.520977	0.999811
GGPS1	32.5712	0.0290372	0.717556	0.0404669	0.967721	0.999811
GGT7	13.0608	-0.851657	1.3283	-0.641165	0.521415	0.999811
GHITM	347.339	0.0102056	0.271968	0.0375251	0.970066	0.999811
GID8	11.2363	1.07176	1.14681	0.934562	0.350014	0.999811
GINM1	60.0654	0.107874	0.451191	0.239087	0.811038	0.999811
GJA1	19.143	-0.642641	0.783305	-0.820422	0.411976	0.999811
GK5	12.9	0.0197407	1.71994	0.0114776	0.990842	0.999811
GLA	16.0294	0.491904	0.888052	0.553913	0.579638	0.999811
GLB1	214.318	-0.04293	0.359517	-0.11941	0.90495	0.999811
GLE1	10.234	-6.03091	2.51308	-2.39981	0.0164038	0.469713
GLG1	100.734	-0.104712	0.433175	-0.241731	0.808988	0.999811
GLIPR1	12.1416	0.782147	1.04634	0.747504	0.454759	0.999811
GLIPR2	71.291	-0.554642	0.409573	-1.3542	0.175674	0.999811
GLMN	36.8747	0.548759	0.693868	0.79087	0.42902	0.999811
GLO1	87.1271	0.739074	0.3509	2.10622	0.0351848	0.657849
GLOD4	60.3949	0.801977	0.503014	1.59434	0.110859	0.999811
GLRB	39.5296	1.07494	0.691224	1.55513	0.119915	0.999811
GLRX	29.6699	0.0450673	0.670918	0.0671727	0.946444	0.999811
GLRX3P2	16.3184	0.550708	0.891251	0.617904	0.536638	0.999811
GLT8D1	28.8892	0.0900866	0.757511	0.118925	0.905335	0.999811
GLT8D2	199.698	-0.0157809	0.418159	-0.0377391	0.969896	0.999811
GLTP	29.7631	0.685537	0.669756	1.02356	0.306042	0.999811
GLUL	34.7757	0.596627	0.561469	1.06262	0.287955	0.999811
GLYR1	14.8814	1.54283	1.04436	1.47729	0.139598	0.999811
GM2A	6.95998	1.14072	1.59251	0.716301	0.473806	0.999811
GMFB	9.21499	0.0943139	1.16343	0.0810653	0.93539	0.999811
GMPPA	34.2314	-0.121618	0.843314	-0.144215	0.885331	0.999811
GMPR2	16.9648	-0.105593	0.900045	-0.11732	0.906607	0.999811
GMPS	105.358	-0.0238689	0.479276	-0.049802	0.96028	0.999811
GMPSP1	10.0672	0.0361022	0.998103	0.0361708	0.971146	0.999811
GNAI1	33.2057	0.703966	0.597725	1.17774	0.2389	0.999811
GNAI2	35.4015	-0.369281	0.56928	-0.64868	0.516545	0.999811
GNAI3	120.573	-0.437663	0.359895	-1.21609	0.223952	0.999811
GNAS	101.526	0.232544	0.354732	0.655549	0.512114	0.999811
GNB1	33.4744	0.216335	0.773471	0.279694	0.779712	0.999811
GNB4	12.8605	-0.06937	1.22359	-0.0566939	0.954789	0.999811
GNB5	11.3925	-0.335316	1.46852	-0.228336	0.819385	0.999811
GNE	15.8824	0.405608	1.6209	0.250237	0.802404	0.999811
GNG11	11.3021	0.110663	1.08704	0.101802	0.918914	0.999811
GNG12	21.5648	1.07263	0.859567	1.24787	0.212078	0.999811
GNG5	6.62896	0.393441	1.25049	0.31463	0.753043	0.999811
GNL2	72.764	-0.593511	0.424957	-1.39664	0.162523	0.999811
GNL3	47.8876	0.523522	0.476044	1.09973	0.271448	0.999811
GNPAT	103.959	0.27628	0.48104	0.574338	0.565739	0.999811
GNPDA1	45.496	-0.468124	0.925988	-0.50554	0.61318	0.999811
GNPDA2	18.7433	-2.24917	1.09386	-2.05617	0.0397663	0.696694
GNPTAB	7.04499	-5.48311	3.53915	-1.54927	0.121316	0.999811
GNPTG	16.6608	0.161061	0.830257	0.19399	0.846184	0.999811
GNS	40.0282	1.91533	0.844775	2.26727	0.0233738	0.547031
GOLGA1	9.82766	-0.982546	1.65579	-0.593398	0.552915	0.999811
GOLGA5	35.3132	0.338325	0.900915	0.375535	0.707263	0.999811
GOLGA7	119.728	0.0581912	0.365467	0.159224	0.873492	0.999811
GOLIM4	12.7323	-0.840393	1.90275	-0.441672	0.658726	0.999811
GOLM1	70.6193	0.370851	0.486508	0.762271	0.445898	0.999811
GOLPH3	21.1962	0.88436	0.686162	1.28885	0.19745	0.999811
GOLPH3L	21.5427	-0.0378667	0.846439	-0.0447365	0.964317	0.999811
GOLT1B	39.6435	0.166083	0.666215	0.249293	0.803134	0.999811
GON4L	12.4128	0.586155	0.988647	0.592886	0.553257	0.999811
GORAB	10.0707	2.24989	1.2783	1.76007	0.0783966	0.953288
GORASP2	108.719	-0.425607	0.601791	-0.707233	0.479421	0.999811
GOSR1	14.2768	0.402895	0.919262	0.438281	0.661183	0.999811
GOT1	57.2051	-0.746421	0.546697	-1.36533	0.17215	0.999811
GOT2	9.01348	-0.0293841	1.12897	-0.0260273	0.979236	0.999811
GPAA1	13.8316	0.511234	0.880179	0.58083	0.561355	0.999811
GPALPP1	15.3935	0.410406	1.0263	0.399891	0.689237	0.999811
GPATCH1	15.7427	-0.0120867	1.47467	-0.00819622	0.99346	0.999811
GPATCH2L	9.74442	0.555542	1.85997	0.298683	0.765182	0.999811
GPBP1	48.867	0.468525	0.843829	0.555237	0.578732	0.999811
GPBP1L1	52.796	1.1479	0.547623	2.09615	0.0360686	0.667108
GPC4	19.391	0.266251	0.943926	0.282068	0.777892	0.999811
GPC6	7.81436	0.536433	2.13082	0.25175	0.801234	0.999811
GPER1	6.94287	-1.09874	1.4748	-0.745012	0.456265	0.999811
GPHN	17.1161	0.126668	1.37918	0.0918435	0.926822	0.999811
GPI	143.621	0.0331541	0.350102	0.0946985	0.924554	0.999811
GPKOW	13.5672	-0.802746	1.33263	-0.602378	0.546923	0.999811
GPN1	34.093	-0.54773	0.649024	-0.843929	0.398709	0.999811
GPN3	21.5791	-1.04675	1.22254	-0.85621	0.391882	0.999811
GPNMB	664.455	-0.321656	0.213168	-1.50893	0.131316	0.999811
GPR1	19.9916	-0.391037	0.792893	-0.493177	0.621887	0.999811
GPR107	11.1526	0.905349	1.43047	0.632905	0.526796	0.999811
GPR108	31.2136	0.131536	0.654471	0.200981	0.840713	0.999811
GPR137B	11.3904	0.850026	1.64636	0.516306	0.605641	0.999811
GPR89A	7.30981	0.128748	1.22824	0.104823	0.916516	0.999811
GPR89B	7.15357	0.190895	1.23724	0.15429	0.877381	0.999811
GPR89P	7.29009	0.330475	1.20594	0.274039	0.784055	0.999811
GPS1	17.2981	0.360004	0.786395	0.45779	0.647104	0.999811
GPX1	79.3904	0.0448535	0.406906	0.110231	0.912226	0.999811
GPX3	20.2655	0.456829	0.760484	0.600708	0.548035	0.999811
GPX4	109.83	-0.215493	0.341717	-0.630619	0.528289	0.999811
GPX7	15.2335	-1.17807	1.85451	-0.635246	0.525268	0.999811
GPX8	66.2128	-0.618494	0.412314	-1.50006	0.1336	0.999811
GRAMD3	61.5931	0.292823	0.60097	0.487251	0.626081	0.999811
GRB2	33.1	0.460411	0.557811	0.82539	0.40915	0.999811
GREM1	15.8061	0.021345	0.900896	0.0236931	0.981097	0.999811
GRHPR	110.216	-0.645195	0.50602	-1.27504	0.202295	0.999811
GRIA3	12.3231	0.74963	1.48443	0.504994	0.613563	0.999811
GRINA	9.25469	0.486739	1.05345	0.462041	0.644052	0.999811
GRIPAP1	7.99837	-5.67077	1.87728	-3.02074	0.00252159	0.196192
GRN	90.8907	0.191374	0.390262	0.490374	0.623869	0.999811
GRPEL1	17.9875	0.603303	0.759171	0.794687	0.426795	0.999811
GRSF1	36.6304	0.262442	0.641689	0.408986	0.68255	0.999811
GS1-257G1.1	11.2574	-0.54426	0.95784	-0.568216	0.569888	0.999811
GS1-44D20.1	21.0219	-0.076449	0.739441	-0.103387	0.917655	0.999811
GS1-531I17.2	10.0894	0.643868	0.975266	0.660197	0.509128	0.999811
GSKIP	13.3828	-0.185395	0.94317	-0.196566	0.844167	0.999811
GSS	55.248	-0.233982	0.449782	-0.520211	0.602916	0.999811
GSTA4	50.0264	-0.46028	0.494995	-0.929868	0.352439	0.999811
GSTK1	79.5333	0.33436	0.437726	0.763857	0.444953	0.999811
GSTM1	31.659	0.562344	0.572786	0.981769	0.326214	0.999811
GSTM2	21.594	0.352949	0.875586	0.4031	0.686874	0.999811
GSTM2P1	30.5493	0.160779	0.608879	0.264058	0.791735	0.999811
GSTM4	18.7021	0.611122	0.82597	0.739883	0.459371	0.999811
GSTM5P1	12.0541	0.766349	0.95429	0.803057	0.421942	0.999811
GSTO1	18.5229	-0.389973	0.765889	-0.509177	0.610628	0.999811
GSTO3P	12.8807	-0.551003	0.909046	-0.606133	0.544427	0.999811
GSTP1	53.7762	-0.128168	0.550042	-0.233016	0.815749	0.999811
GTDC1	16.579	-0.677389	1.11257	-0.608853	0.542622	0.999811
GTF2A2	27.1667	0.480261	0.636523	0.754506	0.450546	0.999811
GTF2B	36.8413	-0.911496	0.765141	-1.19128	0.233544	0.999811
GTF2E1	8.61152	-0.940923	2.27495	-0.413602	0.679166	0.999811
GTF2E2	32.7242	1.058	1.23408	0.857317	0.39127	0.999811
GTF2F1	12.3678	0.0984083	0.945772	0.104051	0.917129	0.999811
GTF2F2	26.5741	-0.0385284	0.651033	-0.0591803	0.952808	0.999811
GTF2F2P1	7.21115	0.029958	1.20956	0.0247677	0.98024	0.999811
GTF2H1	8.4282	-0.352484	1.18167	-0.298293	0.76548	0.999811
GTF2H2	14.2542	0.0417697	0.923626	0.0452236	0.963929	0.999811
GTF2H2B	12.979	0.18307	1.01425	0.180498	0.856762	0.999811
GTF2H2C	12.3958	-0.385966	1.1225	-0.343844	0.730963	0.999811
GTF2H3	10.4019	-1.65916	1.18105	-1.40482	0.160075	0.999811
GTF2I	29.8378	0.450952	0.798983	0.564407	0.572477	0.999811
GTF2IP1	16.4231	0.355006	0.896532	0.395977	0.692122	0.999811
GTF2IP4	23.0898	0.0296175	0.773703	0.0382802	0.969464	0.999811
GTF2IRD1	8.36389	-5.72462	2.83096	-2.02215	0.0431607	0.721783
GTF3A	76.395	-0.489111	0.532812	-0.917982	0.358628	0.999811
GTF3C2	8.34765	0.850972	1.41364	0.60197	0.547194	0.999811
GTF3C3	31.0527	-1.25798	1.18926	-1.05778	0.290157	0.999811
GTF3C5	23.2399	-0.584281	0.900082	-0.649142	0.516247	0.999811
GTPBP10	17.7225	-0.921603	0.865116	-1.06529	0.286743	0.999811
GTPBP4	98.8617	0.952569	0.372428	2.55773	0.0105359	0.379151
GTPBP8	11.5057	-0.321187	1.01414	-0.316708	0.751465	0.999811
GUCY1B3	12.5059	-6.34143	1.90431	-3.33004	0.000868329	0.107042
GUF1	9.03804	-0.730413	2.23231	-0.3272	0.743516	0.999811
GUK1	156.063	0.223226	0.307398	0.726178	0.46773	0.999811
GUSB	41.6694	-0.241489	0.642451	-0.375887	0.707001	0.999811
GYG1	17.1298	0.893243	0.880926	1.01398	0.310591	0.999811
GYG1P3	10.3044	0.846479	0.993599	0.851932	0.394252	0.999811
GYG2	15.2676	2.21918	2.05333	1.08077	0.279799	0.999811
GYPC	74.5422	0.122629	0.44918	0.273007	0.784848	0.999811
GYS1	8.13637	-1.00867	1.95244	-0.51662	0.605421	0.999811
H1F0	8.82256	-0.162486	1.06769	-0.152185	0.879041	0.999811
H2AFY	72.6305	0.403604	0.434273	0.929378	0.352693	0.999811
H2AFZ	48.6484	-0.453036	0.54444	-0.832113	0.405345	0.999811
H3F3AP4	46.1964	-0.108862	0.571501	-0.190485	0.848929	0.999811
H3F3AP6	45.861	-0.0920551	0.5845	-0.157494	0.874856	0.999811
H3F3B	131.495	-0.362705	0.362646	-1.00016	0.317232	0.999811
HACD3	102.871	0.0856159	0.440549	0.194339	0.84591	0.999811
HACL1	30.425	-0.870462	0.631228	-1.379	0.167895	0.999811
HADH	67.8293	-0.250534	0.702256	-0.356756	0.721275	0.999811
HADHA	22.1368	0.109308	0.721563	0.151487	0.879591	0.999811
HADHAP1	27.9406	0.457551	0.617118	0.741432	0.458432	0.999811
HADHB	26.9374	0.488358	0.754537	0.647228	0.517484	0.999811
HAGH	11.0602	-1.01693	0.979968	-1.03772	0.299401	0.999811
HARS	31.2556	-0.0643769	0.685872	-0.0938614	0.925219	0.999811
HAT1	72.7084	-0.428158	0.568881	-0.752632	0.451671	0.999811
HAUS1P1	7.04305	0.171156	1.14737	0.149173	0.881417	0.999811
HAUS1P2	10.4368	-0.0937239	0.968372	-0.0967851	0.922897	0.999811
HAUS4	7.48293	0.347673	1.11122	0.312876	0.754375	0.999811
HAUS8	7.81476	-1.38381	1.61338	-0.857707	0.391054	0.999811
HAX1	30.4514	-0.305686	0.651235	-0.469395	0.638787	0.999811
HBP1	38.2624	-0.875089	1.17789	-0.742927	0.457526	0.999811
HBS1L	142.626	0.233643	0.364482	0.641029	0.521504	0.999811
HDAC1	19.51	-0.954681	0.916694	-1.04144	0.297672	0.999811
HDAC2	79.5601	0.34605	0.553464	0.625245	0.531811	0.999811
HDAC3	28.9454	0.0920043	0.683956	0.134518	0.892993	0.999811
HDAC6	11.7783	-0.0679111	1.44396	-0.047031	0.962489	0.999811
HDAC8	12.338	0.914416	1.33025	0.687401	0.49183	0.999811
HDDC2	29.338	-1.25098	0.806207	-1.55169	0.120736	0.999811
HDGF	8.3643	0.3007	1.26543	0.237627	0.812171	0.999811
HDHD2	10.3588	0.315741	1.14114	0.276689	0.782019	0.999811
HDLBP	404.769	-0.517448	0.20915	-2.47405	0.013359	0.432857
HEATR1	8.9057	-0.737552	1.12446	-0.655919	0.511877	0.999811
HEATR6	7.36785	-5.57958	2.5057	-2.22676	0.0259635	0.581015
HEBP1	29.4354	0.175309	0.679024	0.258178	0.796269	0.999811
HEBP2	8.43632	0.420635	1.07651	0.390739	0.69599	0.999811
[truncated: 3,327 more rows]
