# Supplementary material for: Enhanced biocompatibility of 3D printed resin parts via wet autoclave postprocessing: implications for stem cell organ-on-a-chip culture
Source: Royal Society of Chemistry journal article supplement (doi:10.1039/d4ma01191k), 2025-01-01
Supplement: d4ma01191k3.xlsx [file d4ma01191k3.xlsx]

## Sheet: Sheet2
BM													BM		D90
GeneID	Full name	Function	Base mean	log2(FC)	StdErr	Wald-Stats	P-value	P-adj					Count	Percent	Count	Percent
ACO1	aconitase 1(ACO1)	Carbon metabolism	150.648	1.06093	0.275821	3.84645	0.000119844	0.0335941	TCA			Carbon metabolism	1	0.0416667	7	0.0843373
BGN	biglycan(BGN)	ECM, related to decorin	145.378	-1.21857	0.309446	-3.93791	8.21942e-05	0.025751				ECM, Cell adhesion, Cell migration	10	0.416667	19	0.228916
COL1A1	collagen type I alpha 1 chain(COL1A1)	ECM	643.828	-1.08247	0.209753	-5.16068	2.4606e-07	0.000262103				Cholesterol	2	0.0833333	10	0.120482
DPT	dermatopontin(DPT)	ECM, related to decorin	176.222	-2.02581	0.47071	-4.30372	1.6795e-05	0.00900643				Lipid and fatty acid metabolism	3	0.125	10	0.120482
FABP3	fatty acid binding protein 3(FABP3)	Fatty acid metabolism	28.4092	3.71022	0.715444	5.18589	2.14981e-07	0.000262103				Other	8	0.333333	37	0.445783
FDFT1	farnesyl-diphosphate farnesyltransferase 1(FDFT1)	Sterol synthesis (cholesterol)	415.856	1.13771	0.195655	5.81489	6.06746e-09	1.07718e-05				Total	24		83
GDE1	glycerophosphodiester phosphodiesterase 1(GDE1)	glycerophospholipid metabolism	17.9495	-6.84651	1.64802	-4.15439	3.26156e-05	0.0133624
IGFBP3	insulin like growth factor binding protein 3(IGFBP3)	Secreted, limits proliferation	169.888	-1.36379	0.330862	-4.12194	3.75702e-05	0.0142928
ITGA4	integrin subunit alpha 4(ITGA4)	Cell adhesion	10.9126	7.6171	1.79845	4.23538	2.28165e-05	0.0101267	*
MFAP4	microfibril associated protein 4(MFAP4)	ECM	239.008	-0.912003	0.241043	-3.78357	0.000154596	0.0392084
NRDC	nardilysin convertase(NRDC)	Migration, proliferation	212.042	1.3064	0.3062	4.2665	1.98564e-05	0.0096141	*
OSBPL6	oxysterol binding protein like 6(OSBPL6)	lipid receptor, cholesterol trafficing regulator	16.1094	-6.67914	1.7193	-3.88479	0.000102418	0.0303045
PLD1	phospholipase D1(PLD1)	produce phosphatidic acid, possibly needed for endocytosis	10.6617	5.85581	1.44128	4.06291	4.84639e-05	0.0161324
POSTN	periostin(POSTN)	ECM, related to integrins	2860.24	-0.949138	0.19106	-4.96775	6.77336e-07	0.000601249
PTPRG	protein tyrosine phosphatase receptor type G(PTPRG)	Cell growth, differentiation	14.1319	3.73719	1.00171	3.7308	0.000190873	0.0441995
SCD	stearoyl-CoA desaturase(SCD)	Fatty acid synthesis	193.218	1.28708	0.299167	4.30221	1.69103e-05	0.00900643
SERPINF1	Serpin family F member 1	VEGF inhibiting, downregulated by hypoxia, suppresses migration and proliferation in endothelial cells	1200.65	-0.842623	0.141422	-5.95823	2.54985e-09	6.79026e-06
SKIV2L2	Ski2 like RNA helicase 2	located exosome	34.219	-7.7681	1.61567	-4.80799	1.52455e-06	0.00115997
SPARC	Secreted protein acidic and cystein rich	ECM synthesis, calcification of collagen	3060.06	-0.748277	0.111867	-6.68897	2.24742e-11	1.19697e-07
TGFBI	transforming growth factor beta induced(TGFBI)	ECM, cell-collagen interaction, bone formation	328.61	-1.28113	0.289453	-4.42605	9.59746e-06	0.00638951
TIMP3	TIMP metallopeptidase inhibitor 3(TIMP3)	ECM remodelling	69.0254	-2.11534	0.516397	-4.09634	4.19728e-05	0.0149031
TOP2B	DNA topoisomerase II beta(TOP2B)	Alters DNA topology	15.0505	-6.57104	1.74531	-3.76497	0.000166567	0.0403244
TXNRD1	thioredoxin reductase 1(TXNRD1)	Oxireductase	150.949	1.27107	0.334809	3.7964	0.000146813	0.0390963
USP4	ubiquitin specific peptidase 4(USP4)	Substrates involved in TGF-β and Wnt/β-catenin pathways	88.0198	1.30264	0.351047	3.71073	0.00020666	0.0458613
D90
GeneID	Full name	Function	Base mean	log2(FC)	StdErr	Wald-Stats	P-value	P-adj
ABI3BP	ABI family member 3 binding protein	ECM, cell adhesion	98.6163	2.00846	0.395961	5.07238	3.92877e-07	0.000167944	*
ACAT2	sterol O-acyltransferase 2	Lipid metabolism	246.107	1.213	0.255096	4.75508	1.98366e-06	0.000555563
ACSL4	acyl-CoA synthetase long chain family member 4	lipid synthesis, fatty acid degradation	31.5169	2.39773	0.589755	4.06564	4.79017e-05	0.00972644
AHNAK	AHNAK nucleoprotein	Cell structure, migration	93.7867	0.810347	0.229392	3.53259	0.000411514	0.0482348	*
AKR1C1	aldo-keto reductase family 1 member C1	Inactivates ketosteroid hormones, specific adipose	266.333	1.88597	0.327423	5.76005	8.40875e-09	5.69132e-06
AKR1C2	aldo-keto reductase family 1 member C2	Inactivates ketosteroid hormones, specific adipose	281.965	1.43893	0.22359	6.43557	1.2301e-10	1.24886e-07
AKR1C3	aldo-keto reductase family 1 member C3	Inactivates ketosteroid hormones, specific adipose	289.341	0.884605	0.165467	5.34611	8.98628e-08	4.29333e-05
AKR1C4	aldo-keto reductase family 1 member C4	Inactivates ketosteroid hormones, specific adipose	56.6913	1.55103	0.310505	4.99518	5.87822e-07	0.000207578
ANKRD28	ankyrin repeat domain 28	Cell migration, adhesion	9.34885	4.93407	1.2537	3.93559	8.2991e-05	0.014979	*
ANXA2	annexin A2	cell growth, osteoclast formation, cell motility, cell-cell/cell-ECM interaction	981.012	-0.506484	0.142517	-3.55384	0.000379645	0.0474381
ANXA2P2	annexin A2 pseudogene 2	endocytosis, cholesterol transport	1049.72	-0.506675	0.139464	-3.63301	0.000280135	0.0392286	phosphatidylserine
AP2M1	adaptor related protein complex 2 subunit mu 1	protonpumping in endosomes and lysosomes	266.852	-0.506463	0.135936	-3.72574	0.000194739	0.0310132
APOD	apolipoprotein D	upregulated by steroids, varied function, lipid metabolism, excreated	81.1408	-1.60833	0.380016	-4.23227	2.31347e-05	0.00521945
ATF4	activating transcription factor 4	Transcription	136.434	1.20609	0.343921	3.50687	0.000453417	0.0486683
CAPN7	calpain 7	unknown	10.7331	3.658	1.0524	3.47586	0.00050922	0.04983
CD44	CD44 molecule (IN blood group)	Cell-cell interaction, cell adhesion, migration	417.112	0.915509	0.257501	3.55536	0.000377459	0.0474381	*
CLU	clusterin	extracellular molecular chaperone, degradation of missfolded proteins	3773.21	-0.619355	0.0998562	-6.20247	5.55839e-10	5.01614e-07
COL3A1	collagen type III alpha 1 chain	ECM	2245.28	-1.63383	0.299139	-5.46178	4.71381e-08	2.39285e-05
COL6A3	collagen type VI alpha 3 chain	ECM	607.688	-0.888422	0.251742	-3.5291	0.000416982	0.0482348
DCN	decorin	ECM assembly	2119.3	-1.38768	0.171598	-8.08678	6.1262e-16	1.65857e-12
DHCR7	7-dehydrocholesterol reductase	Cholesterol synthesis	83.9338	1.17249	0.329477	3.55864	0.00037278	0.0474381
DPT	dermatopontin	ECM, related to decorin	161.042	-2.31086	0.249122	-9.27601	1.75949e-20	1.42905e-16
ERCC8	ERCC excision repair 8, CSA ubiquitin ligase complex subunit	DNA repair	34.9454	-2.22619	0.490978	-4.53418	5.78268e-06	0.00142324
ERP44	endoplasmic reticulum protein 44	ER protein	209.212	-0.666505	0.190309	-3.50222	0.000461396	0.0486683
FABP3	fatty acid binding protein 3	Fatty acid metabolism	54.3587	4.03076	0.452504	8.90767	5.21141e-19	2.11635e-15
FABP3P2	fatty acid binding protein 3 pseudogene 2	Fatty acid metabolism	5.73506	4.94165	1.38228	3.57499	0.000350246	0.0458823
FADS2	fatty acid desaturase 2	Fatty acid metabolism, Fatty acid desaturation	153.159	1.29437	0.25703	5.03587	4.75688e-07	0.000183978
FBLN5	fibulin 5	ECM, cell adhesion	288.754	-1.24232	0.224658	-5.5298	3.20592e-08	1.7359e-05
FDFT1	farnesyl-diphosphate farnesyltransferase 1	Sterol synthesis (cholesterol)	520.975	1.01962	0.139152	7.32741	2.34648e-13	4.76453e-10
FDPS	farnesyl diphosphate synthase	Sterol synthesis (cholesterol)	129.469	1.35285	0.33091	4.08827	4.34594e-05	0.0090507
FDPSP1	farnesyl diphosphate synthase pseudogene 1	Sterol synthesis (cholesterol)	104.461	1.31074	0.297292	4.40893	1.03883e-05	0.00248158
FTL	ferritin light chain	regulate iron storage	3874.08	0.859171	0.17512	4.90619	9.28642e-07	0.000301697
FTLP3	ferritin light chain pseudogene 3	regulate iron storage	1374.28	0.905984	0.19439	4.66065	3.15206e-06	0.000853367
GNL2	G protein nucleolar 2	RNA binding	68.0333	-1.11987	0.284215	-3.94021	8.1412e-05	0.014979
GOLGA7	golgin A7	Golgi protein	97.0564	-1.03268	0.287286	-3.59461	0.000324876	0.0439774
GPI	glucose-6-phosphate isomerase	carbon metabolism	236.273	0.783698	0.195428	4.01016	6.06783e-05	0.0114611	Glycolysis 2
HEBP1	heme binding protein 1	promotes calcium mobilization	59.5627	1.29695	0.347521	3.73201	0.000189957	0.0308566
HOOK3	hook microtubule tethering protein 3	microtubule-organell binding	12.4281	4.93988	1.31004	3.77078	0.000162736	0.0275363
IDI1	isopentenyl-diphosphate delta isomerase 1	Sterol synthesis (cholesterol)	118.441	0.892591	0.25589	3.48819	0.000486303	0.0487737
ISLR	immunoglobulin superfamily containing leucine rich repeat	Cell adhesion	138.084	-0.960432	0.198813	-4.83084	1.35962e-06	0.000394386
KDM3A	lysine demethylase 3A	splicing of cell-cycle genes following DNA damage	9.28339	-6.8187	1.351	-5.04714	4.48463e-07	0.000182121
KLF10	KLF transcription factor 10	transcriptional repressor	27.3665	-1.71368	0.466951	-3.66994	0.00024261	0.0351872
LASP1	LIM and SH3 protein 1	reorganization of cytoskeleton during cell motility	30.5398	1.61156	0.449334	3.58655	0.000335077	0.0446147
LSS	lanosterol synthase	Cholesterol synthesis	41.0143	1.95467	0.530177	3.68683	0.000227068	0.0341527
LUM	lumican	ECM assembly, decorin like	376.835	-0.637152	0.181258	-3.51517	0.00043947	0.0482348
MFAP2	microfibril associated protein 2	(ECM?),antigen of elastin-associated microfibrils	171.648	-0.885215	0.242183	-3.65515	0.00025703	0.0366246
MFAP4	microfibril associated protein 4	ECM, cell adhesion or intercellular interactions	232.181	-1.19982	0.260213	-4.61092	4.00893e-06	0.00101752
MMP3	matrix metallopeptidase 3	ECM remodelling	24.8159	-3.73509	0.651422	-5.73375	9.8235e-09	6.13742e-06
NQO1	NAD(P)H quinone dehydrogenase 1	ROS protection	311.699	1.66455	0.231274	7.19731	6.14129e-13	9.97592e-10
OGDH	oxoglutarate dehydrogenase	carbon metabolism	10.8916	5.29705	1.5164	3.49318	0.000477305	0.0487737	TCA
PAM	peptidylglycine alpha-amidating monooxygenase	biosynthesis of many signaling peptides and some fatty acid amides	122.512	1.47182	0.421951	3.48813	0.000486416	0.0487737
PCSK9	proprotein convertase subtilisin/kexin type 9	cholesterol and fatty acid metabolism	38.6905	2.37484	0.459087	5.17296	2.30414e-07	0.000103968
PDS5A	PDS5 cohesin associated factor A	Gene expression	11.8116	3.93952	1.00489	3.92037	8.84141e-05	0.0156109
PERP	p53 apoptosis effector related to PMP22	desmosome cell-cell junctions	68.5038	0.921544	0.250933	3.67247	0.000240213	0.0351872
PGD	phosphogluconate dehydrogenase	carbon metabolism	79.9444	1.30257	0.310063	4.20099	2.65752e-05	0.00583362	Pentose pathway 3
PGDP1	phosphogluconate dehydrogenase pseudogene 1	carbon metabolism	69.3583	1.25515	0.300987	4.17012	3.04435e-05	0.00650689	Pentose pathway 3
PGLS	6-phosphogluconolactonase	carbon metabolism	52.7379	1.40879	0.350467	4.01974	5.82613e-05	0.0112666	Pentose pathway 2
PHGDH	phosphoglycerate dehydrogenase	carbon metabolism	471.364	0.590928	0.117819	5.01554	5.2884e-07	0.000195238	Committed step for L-serine production
PI16	peptidase inhibitor 16	extracellular, not clearly defined	4.2895	-5.73853	1.63028	-3.51996	0.000431612	0.0482348
PLCD1	phospholipase C delta 1	intracellular signal transduction	32.4166	1.87097	0.405063	4.61897	3.85642e-06	0.00101038
POSTN	periostin	ECM, related to integrins	3014.77	-0.930257	0.257115	-3.61806	0.00029682	0.0408605
SAP30BP	SAP30 binding protein	transcriptional repressor	70.6791	-1.16454	0.328889	-3.54084	0.000398855	0.0482348
SARS	seryl-tRNA synthetase 1	protein translation	551.994	-0.505267	0.135823	-3.72004	0.00019919	0.0311119	transfers L-serine to tRNA
SCD	stearoyl-CoA desaturase	Fatty acid synthesis	297.909	1.52894	0.310983	4.91648	8.8112e-07	0.000298186
SERPINF1	serpin family F member 1	VEGF inhibiting, downregulated by hypoxia, suppresses migration and proliferation in endothelial cells	1228.84	-0.957563	0.144193	-6.64086	3.11856e-11	3.61842e-08	*
SFRP2	secreted frizzled related protein 2	modulates Wnt signaling	55.6932	-2.68899	0.442164	-6.08143	1.19113e-09	9.67434e-07
SGPL1	sphingosine-1-phosphate lyase 1	cholesterol and fatty acid metabolism, apoptosis	6.95072	-4.15066	1.17768	-3.52445	0.000424362	0.0482348
SIPA1L1	signal induced proliferation associated 1 like 1	reorganisation of actin cytoskeleton	9.477	5.70885	1.34301	4.25079	2.13021e-05	0.00494329
SOD2	superoxide dismutase 2	ROS protection	42.8679	1.48971	0.425838	3.4983	0.000468238	0.0487568
SPARC	secreted protein acidic and cysteine rich	ECM synthesis, calcification of collagen	3043.34	-0.999182	0.170738	-5.85213	4.85325e-09	3.58346e-06			DPT
STARD5	StAR related lipid transfer domain containing 5	cholesterol transporter	6.83935	4.54912	1.28771	3.53272	0.000411307	0.0482348			FABP3
STK4	serine/threonine kinase 4	apoptosis	8.04145	4.79834	1.27777	3.75525	0.000173171	0.0287039	serine		DCN
TEAD2	TEA domain transcription factor 2	transcription factor, apoptosis, YAP/TAZ	4.59501	-5.05935	1.44355	-3.5048	0.00045695	0.0486683			SERPINF1
TKT	transketolase	carbon metabolism	663.86	1.20095	0.246168	4.87857	1.06858e-06	0.000333809	Pentose pathway 5		CLU
TNC	tenascin C	ECM, adhesion, proliferation, migration	71.8113	-3.28791	0.58416	-5.62844	1.81845e-08	1.05496e-05			SPARC
TRIM22	tripartite motif containing 22	antiviral immunity	68.0086	1.24445	0.25577	4.8655	1.14168e-06	0.000343435			MMP3
TXNRD1	thioredoxin reductase 1	Oxireductase	216.03	1.38075	0.201699	6.84561	7.61529e-12	1.03086e-08			TNC
USO1	USO1 vesicle transport factor	vesicle transport factor	74.973	1.48825	0.427361	3.48242	0.000496903	0.0492177			FBLN5
USP14	ubiquitin specific peptidase 14	deubiquitinase, antiviral immunity	52.9936	1.31479	0.373708	3.51823	0.000434434	0.0482348			COL3A1
VIM	vimentin	cytoskeleton component	1432.8	1.06842	0.282167	3.78646	0.000152806	0.0264061			PCSK9
WDR78	dynein axonemal intermediate chain 4	not clear	4.45579	-5.75892	1.5566	-3.69968	0.000215874	0.0330817			ABI3BP
YTHDC1	YTH N6-methyladenosine RNA binding protein C1	mRNA splicing	4.52843	-5.05149	1.42924	-3.53439	0.00040871	0.0482348			FTL
ZNF581	coiled-coil domain containing 106	transcription	23.3341	2.06989	0.513684	4.0295	5.58966e-05	0.011073			ISLR
											MFAP4
											APOD
											GPI
											HOOK3
											HEBP1
											MFAP2
											POSTN
											GOLGA7
											ANXA2
											CD44
											COL6A3
											LUM
											ERP44
											PAM
