# Supplementary material for: Enhanced biocompatibility of 3D printed resin parts via wet autoclave postprocessing: implications for stem cell organ-on-a-chip culture
Source: Royal Society of Chemistry journal article supplement (doi:10.1039/d4ma01191k), 2025-01-01
Supplement: d4ma01191k4.xlsx [file d4ma01191k4.xlsx]

## Sheet: Figure 1
	Formlabs Biomed Clear
	Substracted control
		Integral(1.332,1.269)	Integral(1.482,1.455)	Integral(1.523,1.497)	Integral(2.058,2.038)	Integral(2.281,2.196)	Integral(2.353,2.301)	Integral(2.554,2.538)	Integral(3.799,3.769)	Integral(3.853,3.810)	Integral(4.051,3.965)	Integral(6.986,6.883)	Integral(7.301,7.256)	Integral(7.764,7.481)	Integral(7.998,7.971)	SUM
	D_SHORTIPA	0.0887236	0.00819598	0.0103277	0.00729929	0.208322	0.0170595	0.00575937	0.0126386	0.0202098	0.211974	0.0904614	0.0306229	0.155244	0.00955134	0.87639
	D_SHORTIPA	0.0894376	0.00890678	0.0100327	0.00386572	0.207604	0.0167687	0.00606458	0.0133131	0.0202346	0.248486	0.0999923	0.035804	0.175653	0.0114121	0.947576
	D_SHORTIPA	0.0933645	0.00926543	0.00962983	0.00725712	0.204986	0.0177963	0.0065607	0.0142185	0.0222375	0.297052	0.0683449	0.0222861	0.0993766	0.00346004	0.875836
	D_LONGIPA	0.0890268	0.0303786	0.048588	0.00282387	0.183467	0.0256683	0.00602042	0.0125149	0.0234627	0.303498	0.0721987	0.0213093	0.150126	0.00710489	0.976187
	D_LONGIPA	0.0897513	0.0329615	0.0530049	0.00287877	0.20001	0.0262629	0.00580822	0.0145257	0.0270758	0.267942	0.0551238	0.0152222	0.111935	0.00348551	0.905988
	D_LONGIPA	0.0762504	0.029019	0.0473693	0.00237018	0.181732	0.0249095	0.00559362	0.0139296	0.0234341	0.177387	0.0490177	0.014563	0.0975535	0.00354109	0.74667
	W_SHORTIPA	0.0411252	0.00275535	0.00282828	0.00404846	0.0481685	0.0132736	0.00709396	0.00763849	0.00597953	0.123141	0.0191474	0.0082766	0.0189542	0.000405898	0.302836
	W_SHORTIPA	0.0434516	0.00337324	0.00263097	0.00624288	0.0482705	0.0154347	0.00790122	0.00794458	0.00650375	0.149372	0.043534	0.0178755	0.0769578	0.0054867	0.434979
	W_SHORTIPA	0.0483857	0.00474431	0.00436482	0.00836903	0.055542	0.0165202	0.00775793	0.00805331	0.00681016	0.174312	0.0236545	0.0113745	0.0278551	0.00117742	0.398921
	W_LONGIPA	0.0499428	0.00691475	0.00698555	0.00187748	0.0503807	0.0148311	0.00731976	0.00795767	0.00579977	0.182761	0.0128353	0.00516588	0.012148	0.000184118	0.365104
	W_LONGIPA	0.0470601	0.00574661	0.00553441	0.00109186	0.048713	0.0139007	0.00649415	0.0081473	0.00614113	0.175474	0.0103031	0.00433838	0.00880489	0.000476841	0.342226
	W_LONGIPA	0.0467863	0.00648472	0.00742901	0.00204264	0.0488094	0.0150419	0.00668882	0.00876168	0.0065723	0.149016	0.0101247	0.00371871	0.00682894	0.000339808	0.318645
		MEAN	SD
	D_SHORTIPA	0.899934	0.0412599
	D_LONGIPA	0.876282	0.117607
	W_SHORTIPA	0.378912	0.0683062
	W_LONGIPA	0.341992	0.0232301
	3DResyns Biotough D90 MF
	Substracted control
		Integral(1.300,1.270)	Integral(2.057,2.040)	Integral(2.283,2.197)	Integral(2.447,2.397)	Integral(3.464,3.403)	Integral(3.564,3.504)	Integral(3.678,3.606)	Integral(3.909,3.827)	Integral(4.042,3.975)	Integral(6.039,5.947)	Integral(6.259,6.100)	Integral(6.487,6.377)	Integral(6.951,6.881)	Integral(7.601,7.462)	Integral(7.770,7.638)	SUM
	D_CS	0.0283091	0	0.119799	0.00549095	0.955781	0.826138	0.731539	0.0772092	-0.0130027	0	0	0	0.0244458	0.0112456	0	2.76696
	D_CS	0.0326904	0.00378585	0.194456	0.02733	1.0482	0.919881	0.819696	0.130294	0.00581484	0.013597	0.00960047	0.0394227	0.0881814	0.0629998	0.00940941	3.40536
	D_CS	0.0329667	0.00196565	0.0971373	0.0123295	0.790951	0.685375	0.612288	0.114359	0.00472749	0.0120761	0.00858194	0.0214016	0.0476247	0.0351155	0.00620171	2.4831
	D_CSTS	0.0367207	0.00614565	0.067424	0.0119198	0.111206	0.10125	0.101909	0.199995	0.00429259	0.01619	0.0103047	0.0133569	0.020614	0.0150251	0.0031296	0.719483
	D_CSTS	0.0382214	0.00307357	0.0596475	0.00710316	0.0902264	0.0822589	0.0798745	0.189518	0.00336205	0.013295	0.00996982	0.0114361	0.0148141	0.0115388	0.00358148	0.617921
	D_CSTS	0.0418462	0.00518447	0.0654189	0.00899481	0.0945827	0.0888119	0.088115	0.22737	0.00632763	0.0145236	0.0105808	0.0113364	0.0137834	0.0131016	0.00456811	0.694545
	D_SHORTIPA	0.0380488	0.00697965	0.15858	0.0102949	0.0295178	0.00924851	0.0184346	0.207114	0.0449428	0.0546008	0.0520817	0.0340638	0.0361655	0.0305129	0.00571445	0.7363
	D_SHORTIPA	0.0383171	0.0102182	0.219773	0.0138595	0.0312456	0.0102462	0.0257752	0.196563	0.0434463	0.0548025	0.050472	0.0493618	0.0694774	0.0518258	0.00880533	0.874189
	D_SHORTIPA	0.0337222	0.00948559	0.195483	0.0097412	0.0358666	0.0110114	0.0240484	0.115104	0.0499225	0.0608897	0.0575097	0.0430023	0.0609931	0.0492035	0.00841633	0.7644
	D_LONGIPA	0.0339406	0.00100169	0.197842	0.00965191	0.00492389	0.00522856	0.0145465	0.146305	0.00748397	0.0148549	0.0110043	0.0415006	0.0576087	0.04478	0.00883537	0.599508
	D_LONGIPA	0.0360018	0.00148905	0.185215	0.0149014	0.00485496	0.00665539	0.0146835	0.165464	0.00912324	0.0173436	0.0119234	0.0401563	0.0578226	0.0416343	0.0081334	0.615401
	W_CS	0.025009	0.00296503	0.0445785	0.0034461	0.0216706	0.0224864	0.0186924	0.101507	0.00689862	0.0154966	0.0128087	0.0114648	0.00833148	0.0128224	0.0031258	0.311304
	W_CS	0.0224891	0.00316192	0.0400223	0.00441554	0.00687722	0.00919566	0.00768802	0.119499	0.00236748	0.00945744	0.00838608	0.00687852	0.00732475	0.00794859	0.000732331	0.256444
	W_CSTS	0.0249208	0.00167002	0.0335531	0.00348881	0.013738	0.0153904	0.0116921	0.136536	0.00426666	0.0129424	0.00710414	0.00656789	0.0105953	0.00540296	0.00236238	0.290231
	W_CSTS	0.0257003	0.00166469	0.0358802	0.00400654	0.00717691	0.00936718	0.00961582	0.189552	0.00126513	0.00612939	0.00512913	0.00628573	0.0055501	0.00382134	0.00190203	0.313046
	W_CSTS	0.0308234	0.00147754	0.0384044	0.00437832	0.0055472	0.00717853	0.00567735	0.213559	0.0040771	0.0123061	0.00828866	0.00726087	0.00517864	0.00548357	0.00345443	0.353096
	W_SHORTIPA	0.0350009	0.00852757	0.0423576	0.00420566	0.00392994	0.00247305	0.00235833	0.237155	0.012055	0.0235344	0.0183383	0.00983757	0.0120892	0.0100947	0.00189698	0.423854
	W_SHORTIPA	0.0337771	0.00620844	0.0379854	0.00343638	0.00486415	0.00215105	0.00380071	0.223943	0.0104991	0.0214266	0.015458	0.00958712	0.00980602	0.0096559	0.00232083	0.39492
	W_SHORTIPA	0.0328827	0.00511765	0.0411534	0.00428971	0.00403148	0.00210989	0.00247474	0.179275	0.0109167	0.0210138	0.0157371	0.00984589	0.0109557	0.00781984	0.00381599	0.35144
	W_LONGIPA	0.0222251	0.00113455	0.0277408	0.00427442	0	0.00124937	0	0	0.00470427	0.0108003	0.00816168	0.00589273	0.00403377	0.00726739	0.00195587	0.0994403
	W_LONGIPA	0.0198038	0.000984675	0.0295461	0.00448214	0	0.00294709	0.00117942	0.0954262	0.00466303	0.0111633	0.0083465	0.00764357	0.00583169	0.0081143	0.00203019	0.202162
		MEAN	SD
	D_CS	2.88514	0.472353
	D_CSTS	0.677316	0.052928
	D_SHORTIPA	0.791629	0.0728656
	D_LONGIPA	0.607455	0.0112381
	W_CS	0.283874	0.0387917
	W_CSTS	0.318791	0.0318238
	W_SHORTIPA	0.390071	0.0307452
	W_LONGIPA	0.150801	0.0726351

## Sheet: Figure 2
	BM									D90
	MEAN									MEAN
		(1.64,1.63)	(2.05,2.04)	(2.25,2.24)	(6.95,6.94)	(6.91,6.89)	(6.97,6.96)	(7.28,7.26)			(2.05,2.04)	(2.21,2.20)	(2.220,2.21)	(2.25,2.24)	(6.01,5.99)	(6.43,6.42)	(6.47,6.45)
	DRY	0.0335768	0.00438001	0.0565226	0.0117346	0.0340817	0.0118513	0.0111992		DRY	0.00682171	0.0974381	0.0146946	0.0474295	0.0181621	0.0164453	0.0105461
	WET 1X20	0.01193	0.00535959	0.0100578	0.00459983	0.00621607	0.00452443	0.00447014		WET 1X20	0.00865834	0.0250825	0.00811898	0.0134052	0.00297813	0.00333184	0.00133052
	WET 3X20	0.0093732	0.00349337	0.00552484	0.00260856	0.00402171	0.00236295	0.00330032		WET 3X20	0.00230269	0.0254295	9.2821e-05	0.00216376	0	0	0.000118373
	WET 1X60	0.00581558	0.00439788	0.00491961	0.00312757	0.00291431	0.00272842	0.00280132		WET 1X60	0.00326665	0.00316356	0	0.00122469	0.000759997	0.000717596	0.000206885
	SDEV									SDEV
	DRY	0.00412713	0.002204	0.00110071	0.000610534	0.0006091	0.000527752	0.00101724		DRY	0.00222585	0.0188698	0.00033869	0.0093119	0.00143038	0.00121425	0.00128905
	WET 1X20	0.00429451	0.00228299	0.00223437	0.000987841	0.000954956	0.000887996	0.00128707		WET 1X20	0.0021325	0.0119477	0.00158038	0.0062219	0.000512423	0.000704051	0.0007292
	WET 3X20	0.0016907	0.00127567	0.0013798	0.000619503	0.00116409	0.000447554	0.000731421		WET 3X20	0.000448399	0.00665718	0.000123793	4.43337e-05	0	0	0.000118373
	WET 1X60	0.000852938	0.00119075	0.000387149	0.000173307	0.000389542	0.000493975	0.000561363		WET 1X60	0.00217449	0.000162863	0	0.000345447	0.000535619	0.000486805	0.000110224

## Sheet: Figure 3
	BM				MEAN	SD
	Dry	22558.8	25919.2	28517.8	25665.2	2987.61
	Wet 3X20	15853.8	36748.8	28634.8	27079.1	10534
	Wet 1X60	26274.2	42981.8	38364.8	35873.6	8627.84
	D90
	Dry	2295.75	2064.25	3485.75	2615.25	762.709
	Wet 3X20	16170.2	18758.8	16969.8	17299.6	1325.4
	Wet 1X60		29583.8	31398.8	30491.2	1283.4
	CONTROL	30721.8	23336.8	20639.8	24899.4	5219.49

## Sheet: Figure 5
Presto Blue												Mean	SD
PS
7902.5	5057.5	6016.5	6087.5	5237.5	5896.5	5539.5	5726.5	6455.5	5730.5	5941.5	5296.5	5907.33	742.852
BM
7193.5	8841.5	7536.5	5265.5	7169.5	8123.5	7160.5	4671.5	7809.5	7440.5	5990.5	7974.5	7098.08	1212.29
D90
9222.5	8115.5	8560.5	4511.5	9281.5	6944.5	5536.5	6702.5	7516.5	5142.5	5349.5	7749.5	7052.75	1629.83
Oil Red				Mean	SD			Ratio			Ratio * 10^5
PS								PS			PS
0.222233	0.209333	0.209733	0.212833	0.213533	0.00600722			3.61471e-05	±	4.65789e-06	3.61471	±	0.465789
BM								BM			BM
0.187033	0.161733	0.166333	0.179033	0.173533	0.0115986			2.44479e-05	±	4.48384e-06	2.44479	±	0.448384
D90								D90			D90
0.188533	0.217033	0.175733	0.192833	0.193533	0.0172683			2.74408e-05	±	6.79761e-06	2.74408	±	0.679761

## Sheet: Figure 6
Corrected for reference (MA)
		Leu	Ile	Val	Lac	Ala	Pyr	Met	Lys	Cys	Gly	Ser	Glc	MA	His	Tyr	Phe	Trp	Form
PS	D0	-0.220924	-0.0691671	0.0936264	7.83615	0.473325	-0.340662	-0.0108079	0.0310053	0.0622448	0.178243	1.23295	-0.527625	0	0.00966716	0.00696041	9.43921e-05	-0.0208121	0.0181741
		-0.250524	-0.074127	0.0751098	7.65857	0.374758	-0.36166	-0.013315	0.0330103	0.0694433	0.185912	1.17914	-0.540283	0	0.00660855	0.00230271	0.00452171	-0.0219714	0.0170995
		-0.220924	-0.0691671	0.0936264	7.83615	0.473325	-0.340662	-0.0108079	0.0310053	0.0622448	0.178243	1.23295	-0.527625	0	0.00966716	0.00696041	9.43921e-05	-0.0208121	0.0181741
		-0.641535	-0.162791	-0.10246	6.91149	-1.29198	-0.404755	-0.0220565	-0.0470817	0.0245966	0.0171985	0.385903	-0.780568	0	-0.012663	-0.0518887	-0.0185464	-0.0302519	0.0154317
	D7	-1.88287	-0.521534	-0.881309	5.99034	-2.17543	-0.962609	-0.0712876	-0.439082	-0.128965	0.188505	-0.621292	-4.85005	0	-0.0627836	-0.264803	-0.143113	-0.0629698	0.00620041
		-1.94837	-0.542161	-0.943849	7.10196	-3.39121	-1.03449	-0.0120361	-0.430347	-0.126024	0.102946	-1.07213	-4.77329	0	-0.066756	-0.273028	-0.129888	-0.0632293	0.0113195
		-1.54298	-0.424944	-0.675765	7.24406	-1.69886	-0.909897	-0.0536583	-0.306933	-0.0642855	0.253372	-0.427305	-4.13022	0	-0.0313418	-0.190639	-0.0864273	-0.0448537	0.0169491
		-1.9652	-0.514372	-0.91136	6.09421	-3.2877	-1.03698	-0.0588607	-0.422219	-0.125042	0.0871356	-0.974823	-4.62828	0	-0.0711498	-0.271183	-0.117231	-0.0611364	0.0124788
	D14	-0.416486	-0.140683	-0.0850149	11.7048	-0.103435	-0.701783	0.136357	-0.0030271	0.0253727	0.148794	-0.264433	-1.35333	0	-0.0293774	-0.0534898	-0.000304584	-0.0479297	-0.000179165
		-0.858142	-0.238815	-0.320616	8.80598	-1.00374	-0.775471	0.039418	-0.110414	-0.0131727	0.042516	-0.355956	-1.89568	0	-0.0327	-0.101108	-0.0363868	-0.0398963	0.00464781
		-0.635339	-0.124154	-0.0803222	9.8213	0.122299	-0.693487	0.00224784	0.00671462	0.0267267	0.197411	0.156757	-1.05467	0	-0.00217927	-0.0275883	-0.00870332	-0.025791	0.00937965
		-0.812933	-0.175252	-0.189093	9.86481	-0.364876	-0.745079	-0.0246575	-0.0315117	0.00556576	0.128118	0.0296764	-1.38842	0	-0.00702506	-0.0450105	-0.0263325	-0.0195062	0.0188625
BM	D0	-0.231978	-0.0475668	0.0205119	14.2337	0.172852	-0.306709	-0.0234363	0.022177	0.0755094	0.128662	0.470766	-1.01515	0	0.00618859	-0.00392676	-0.00969163	0.0115617	0.0425306
		-0.354547	-0.0890688	-0.0172334	12.0459	-0.411466	-0.372286	-0.0249733	-0.00903352	0.0460612	0.0959596	0.386114	-0.99594	0	-0.00285271	-0.0249041	-0.00841887	0.0103927	0.0371338
		-0.231978	-0.0475668	0.0205119	14.2337	0.172852	-0.306709	-0.0234363	0.022177	0.0755094	0.128662	0.470766	-1.01515	0	0.00618859	-0.00392676	-0.00969163	0.0115617	0.0425306
		-0.305443	-0.0797993	0.0606066	13.0006	0.347423	-0.358236	-0.00647948	0.0396144	0.0704158	0.156382	1.74503	-0.925645	0	0.00759182	-0.00263269	0.0116717	0.0178076	0.0363297
	D7	-1.53294	-0.434736	-0.733476	11.2936	-1.79286	-1.12466	-0.0688212	-0.406873	-0.143672	0.341115	-0.600414	-4.68886	0	-0.0462852	-0.226461	-0.126646	-0.0298805	0.0469056
		-1.73166	-0.478284	-0.836049	11.0395	-2.63735	-1.18184	-0.0140223	-0.440203	-0.15151	0.241986	-1.03888	-4.92098	0	-0.068293	-0.259665	-0.130895	-0.047255	0.047771
		-2.1855	-0.551071	-1.06008	10.0852	-3.51187	-1.25968	0.0694122	-0.463646	-0.128262	0.122567	-1.17612	-5.20286	0	-0.0810745	-0.302284	-0.139792	-0.0547202	0.0458799
		-1.59694	-0.429597	-0.720312	12.5025	-1.57073	-1.16335	-0.120873	-0.284047	-0.0344	0.270745	-0.527223	-4.58323	0	-0.0261372	-0.191059	-0.0798809	-0.0249673	0.0585855
	D14	-0.290417	-0.098311	-0.0410431	13.3897	0.187023	-0.795527	0.180962	0.0435447	0.0857433	0.170556	-0.230589	-1.23958	0	-0.0103243	-0.0154621	0.0190723	-0.0248277	0.0398674
		-0.728855	-0.215898	-0.249219	13.556	-0.694941	-0.885376	0.0179532	-0.0876587	-0.022553	0.111773	-0.223944	-1.86632	0	-0.0226177	-0.0743524	-0.025773	-0.0201307	0.0271706
		-0.653768	-0.151446	-0.146938	12.6012	-0.0530281	-0.862425	0.01204	-0.00493012	0.0297596	0.199422	-0.00821162	-1.47036	0	-0.00832062	-0.0390617	0.00809178	-0.0165946	0.044029
		-0.924774	-0.199991	-0.246881	11.5592	-0.752315	-0.884618	0.0118095	-0.111445	-0.0274877	0.156584	-0.242019	-1.74943	0	-0.0247505	-0.0816568	-0.0163077	-0.0274768	0.0377444
D90	D0	-0.291993	-0.0760576	0.063083	7.94257	-0.11963	-0.337376	-0.0156425	0.0307375	0.0935838	0.141142	0.84712	-0.679491	0	-0.00450311	-0.0159056	-0.00574503	-0.0144437	0.0296209
		-0.279391	-0.0721182	0.0713601	9.12537	0.0948249	-0.321493	-0.0144201	0.0326602	0.0880025	0.147189	0.910173	-0.710704	0	0.00252406	-0.00717972	0.00380905	-0.0124469	0.0301408
		-0.29689	-0.0795787	0.0737208	8.11138	0.201075	-0.319207	-0.00489293	0.0456054	0.0924639	0.177948	1.12274	-0.594703	0	0.0080539	-0.000912089	0.0108999	-0.014718	0.0309153
		-0.203265	-0.0536682	0.184542	9.2821	0.683676	-0.31956	-0.00296515	0.0821951	0.123732	0.229939	1.54976	-0.631277	0	0.00714863	0.012084	0.0192924	-0.0127952	0.0322816
	D7	-1.74406	-0.476805	-0.815649	8.47794	-1.73947	-1.01991	-0.0517775	-0.343819	-0.0267046	0.286959	-0.751182	-4.7586	0	-0.0381641	-0.223655	-0.111634	-0.0526043	0.0297412
		-1.83885	-0.504014	-0.869526	10.0276	-2.07474	-1.09304	-0.0997908	-0.424348	-0.117053	0.253394	-0.790045	-4.98442	0	-0.0665109	-0.266054	-0.132998	-0.0628813	0.0330536
		-1.9632	-0.506505	-0.902431	7.95825	-2.84981	-1.06654	-0.0835587	-0.422139	-0.111187	0.138925	-0.937937	-4.82022	0	-0.0666382	-0.269405	-0.126281	-0.0613462	0.0253767
		-1.80736	-0.479883	-0.78726	7.84248	-1.87281	-1.00171	-0.0415822	-0.371285	-0.0676319	0.241177	-0.862715	-4.65011	0	-0.0494429	-0.235785	-0.109946	-0.0577056	0.0233604
	D14	-0.308102	-0.117424	-0.029581	15.0407	0.308514	-0.751369	0.0901229	0.0328034	0.0469755	0.222983	0.032755	-1.33877	0	0.00159711	-0.0044537	0.0147037	-0.0149649	0.03099
		-0.834106	-0.226408	-0.281996	12.7185	-0.77575	-0.801483	0.101741	-0.082315	0.0289659	0.0980128	-0.502706	-2.00409	0	-0.0266853	-0.0859816	-0.0221449	-0.0389521	0.0101001
		-0.558821	-0.125432	-0.0746995	13.3977	0.240529	-0.705155	0.064006	0.0449092	0.0639049	0.155525	0.192553	-1.26385	0	-0.00204008	-0.0173124	0.027833	-0.0247424	0.0208675
		-0.992465	-0.22703	-0.287198	12.5228	-0.893238	-0.825512	0.0211285	-0.135726	-0.0479261	0.0870006	-0.318094	-2.02341	0	-0.0266679	-0.0906494	-0.0332333	-0.032033	0.0142418

## Sheet: Figure S2
	Formlabs Clear
	MEAN	(2.25,2.23)	(2.40,2.35)	(5.73,5.71)	(6.14,6.13)	(6.17,6.15)	(6.91,6.89)	(7.52,7.50)	(7.53,7.49)	(7.61,7.60)	(7.63,7.61)	(7.64,7.63)	(7.90,7.89)	(7.918,7.907)
	DRY	0.0587614	0.0139434	0.0805146	0.0282793	0.0847131	0.0323831	0.0379666	0.0843529	0.0121878	0.0170128	0.00564805	0.0401418	0.0358458
	WET 1X20	0.00517341	0.00906866	0.00482632	0.00101579	0.004091	0.00255081	0.0271283	0.0596525	0.00800661	0.0118945	0.00421788	0.0299148	0.026662
	WET 2X20	0.00634877	0.00892455	0.00367495	0.000465538	0.00228809	0.00291905	0.0317815	0.0698852	0.00898538	0.0137588	0.00497967	0.0345104	0.0309084
	WET 3X20	0.00517727	0.00698721	0.0021327	-0.000159974	0.0013123	0.00215243	0.0258776	0.056363	0.00743778	0.0111771	0.00378973	0.0284229	0.0252255
	SD	Integral(2.249,2.236)	(2.403,2.354)	Integral(5.736,5.717)	(6.145,6.134)	Integral(6.170,6.150)	Integral(6.909,6.893)	Integral(7.517,7.506)	Integral(7.534,7.488)	Integral(7.613,7.603)	Integral(7.628,7.617)	Integral(7.642,7.635)	Integral(7.903,7.890)	Integral(7.918,7.907)
	DRY	0.00135279	0.00753305	0.00108103	5.18819e-05	0.000728169	0.000403528	0.000436338	9.40604e-05	0.000179952	0.000113391	0.000355838	0.000464504	3.10811e-05
	WET 1X20	0.000361708	0.0029548	0.00306177	0.000561103	0.00401154	0.00053652	0.00319052	0.00849582	0.00108336	0.00154397	0.000768526	0.00387561	0.00381748
	WET 2X20	0.00076674	0.000831801	0.00355411	0.000882846	0.0025418	0.000223308	0.0011145	0.00187469	0.000257095	0.000490394	0.000303369	0.0010961	0.000903519
	WET 3X20	0.0010144	0.00314623	0.000721929	0.000276189	0.00104357	0.00070046	0.00269808	0.00547908	0.000760784	0.00115664	0.000307547	0.00286751	0.00293204
	Formlabs Dental LT
	MEAN	(1.48,1.46)	(1.50,1.49)	(2.22,2.20)	(2.24,2.23)	(2.27,2.26)	(2.41,2.36)	(2.83,2.8)	(5.73,5.71)	(6.17,6.15)	(6.91,6.89)	(7.03,7.010)	(7.3,7.25)	(7.78,7.46)
	DRY	1.38349	0.341975	0.419801	0.225336	0.0695276	0.426175	0.268115	0.0866045	0.0638166	0.124158	0.0168093	0.0120218	0.32775
	WET 1X20	0.137356	0.012315	0.0186698	0.0118474	0.0269989	0.0412002	0.0322923	0.0101225	0.00568889	0.0050001	0.0078484	0.000859159	0.0159908
	WET 2X20	0.0416432	0.00274427	0.0150639	0.00800214	0.0171571	0.0142355	0.0112593	0.0124368	0.010016	0.00360614	0.00515932	7.83959e-05	0.00755312
	WET 3X20	0.0253623	0.00112522	0.00726795	0.0038167	0.012656	0.00755619	0.00566481	0.0036706	0.00092043	0.002289	0.0038118	6.2728e-05	0.00391911
	SD	(1.485,1.460)	(1.505,1.496)	(2.216,2.206)	(2.247,2.237)	(2.270,2.264)	(2.408,2.360)	(2.833,2.798)	(5.735,5.716)	(6.169,6.154)	(6.911,6.891)	(7.026,7.010)	(7.298,7.254)	(7.784,7.455)
	DRY	0.206814	0.0856664	0.0986241	0.0491248	0.00708255	0.0694922	0.0284194	0.0163525	0.0132289	0.0292569	0.00219473	0.00409139	0.082242
	WET 1X20	0.0287033	0.000824818	0.00124068	0.00120252	0.000984748	0.00856877	0.00863596	0.00490662	0.00500007	0.000577876	0.00110087	0.000746981	0.00278903
	WET 2X20	0.0147485	0.000789512	0.00250201	0.00177566	0.00172678	0.00435239	0.0033386	0.00442255	0.00408411	0.00129439	0.000408729	0.000135786	0.00581154
	WET 3X20	0.00555774	0.000664966	0.000797992	0.000444391	0.00115198	0.00120435	0.000865262	0.00162248	0.000971671	0.00055867	0.000608001	0.000108648	0.00225588
